# Supplementary material for: Bioinformatics Analysis Reveals FOXM1/BUB1B Signaling Pathway as a Key Target of Neosetophomone B in Human Leukemic Cells: A Gene Network-Based Microarray Analysis
Source: Front Oncol. 2022 Jul 1;12:929996. doi: 10.3389/fonc.2022.929996 (PMC9283897; doi:10.3389/fonc.2022.929996)
Supplement: Supplementary file 5 [file Table_1.xlsx]

## Sheet: Filtered
PROBEID	SYMBOL	GENENAME	logFC	AveExpr	t	P.Value	adj.P.Val	B	Status	TSG/Oncogene	Degrees
TC1000007748.hg.1	CDK1	cyclin dependent kinase 1	-1.57301	8.23586	-5.09265	0.00114677	0.0100289	-0.674521	Down		396
TC1700010763.hg.1	BRCA1	BRCA1 DNA repair associated	-1.90487	3.14125	-6.87853	0.000172674	0.0033971	1.30423	Down	TSG	372
TC0500007665.hg.1	CCNB1	cyclin B1	-1.66317	6.81421	-4.87514	0.00148564	0.0118235	-0.946841	Down		344
TC0500008664.hg.1	HSPA4	heat shock protein family A (Hsp70) member 4	-1.81824	7.37772	-8.7294	3.46241e-05	0.00193699	2.944	Down		318
TC1500006965.hg.1	RAD51	RAD51 recombinase	-1.93811	5.36797	-9.54473	1.86332e-05	0.00174206	3.56045	Down		304
TC1100013111.hg.1	CHEK1	checkpoint kinase 1	-1.72534	7.44	-8.58783	3.87485e-05	0.00198133	2.83094	Down		294
TC1700010618.hg.1	TOP2A	DNA topoisomerase II alpha	-2.01942	7.99493	-8.30601	4.8707e-05	0.00209884	2.60023	Down		294
TC0100007678.hg.1	HDAC1	histone deacetylase 1	-1.83815	8.07796	-6.89117	0.000170602	0.00337565	1.31672	Down		292
TC2000008279.hg.1	PCNA	proliferating cell nuclear antigen	-1.79627	7.82554	-8.29266	4.92455e-05	0.00210546	2.5891	Down		290
TC0400011748.hg.1	CCNA2	cyclin A2	-1.54526	10.0574	-6.78339	0.000189203	0.0035465	1.20955	Down		286
TC1000008471.hg.1	KIF11	kinesin family member 11	-1.90838	7.0753	-9.37659	2.10923e-05	0.00176109	3.43797	Down		274
TC0100012172.hg.1	EXO1	exonuclease 1	-2.10199	6.57653	-9.44559	2.00416e-05	0.00174206	3.48851	Down		270
TC1100013021.hg.1	FEN1	flap structure-specific endonuclease 1	-1.52342	7.37447	-6.03134	0.000403783	0.00533813	0.42039	Down	TSG	266
TC0400007617.hg.1	POLR2B	RNA polymerase II subunit B	-1.67954	8.56747	-7.6187	8.7495e-05	0.00256377	2.00413	Down		264
TC1500010715.hg.1	BUB1B	BUB1 mitotic checkpoint serine/threonine kinase B	-2.59545	6.71159	-9.83425	1.51175e-05	0.00174206	3.766	Down	TSG/oncogene	258
TC2200008367.hg.1	CHEK2	checkpoint kinase 2	-1.83386	4.70583	-8.21198	5.26451e-05	0.00213526	2.52153	Down	TSG	250
TC0400011721.hg.1	MAD2L1	mitotic arrest deficient 2 like 1	-2.25448	6.08662	-10.8113	7.75224e-06	0.00174206	4.4131	Down		238
TC0300009337.hg.1	SMC4	structural maintenance of chromosomes 4	-1.98422	8.7803	-9.85496	1.48962e-05	0.00174206	3.78045	Down		236
TC1800006484.hg.1	NDC80	NDC80 kinetochore complex component	-1.76134	7.56655	-8.70382	3.53313e-05	0.00193732	2.92371	Down		236
TC1500007699.hg.1	KIF23	kinesin family member 23	-1.55767	6.82866	-5.86214	0.000483294	0.00595199	0.232376	Down		232
TC0300014041.hg.1	RUVBL1	RuvB like AAA ATPase 1	-1.53158	5.57926	-6.341	0.00029321	0.00445423	0.754323	Down		228
TC0200014404.hg.1	MCM6	minichromosome maintenance complex component 6	-3.02761	5.50659	-5.79898	0.000517305	0.00619461	0.161169	Down		226
TC1100006644.hg.1	RRM1	ribonucleotide reductase catalytic subunit M1	-1.6846	9.89453	-7.4719	9.97012e-05	0.00270345	1.87029	Down		222
TC1700012437.hg.1	SRSF1	serine and arginine rich splicing factor 1	-1.57504	7.00243	-6.47716	0.000255628	0.00415008	0.897122	Down		220
TC0200010480.hg.1	NOP58	NOP58 ribonucleoprotein	-2.24551	6.39472	-11.3541	5.47287e-06	0.00174206	4.74419	Down		216
TC0400008664.hg.1	PLK4	polo like kinase 4	-1.8943	5.62847	-8.29249	4.92522e-05	0.00210546	2.58897	Down		214
TC0400011477.hg.1	CENPE	centromere protein E	-1.51154	5.66391	-7.17838	0.000130251	0.00302701	1.59543	Down		214
TC0600008630.hg.1	TTK	TTK protein kinase	-2.19683	6.88959	-9.36599	2.12591e-05	0.00176109	3.43017	Down		212
TC0900008286.hg.1	SMC2	structural maintenance of chromosomes 2	-2.21914	5.26211	-6.72021	0.000201154	0.00364704	1.14606	Down		212
TC1000007846.hg.1	SIRT1	sirtuin 1	-2.07302	6.43455	-9.54325	1.86533e-05	0.00174206	3.55938	Down		208
TC1000008896.hg.1	SMC3	structural maintenance of chromosomes 3	-1.52722	8.36924	-7.52976	9.46764e-05	0.00264996	1.92332	Down		208
TC0X00006823.hg.1	POLA1	DNA polymerase alpha 1, catalytic subunit	-1.78456	5.72301	-7.09046	0.000141343	0.00311768	1.51115	Down		208
TC0200012742.hg.1	XPO1	exportin 1	-1.536	7.33621	-7.12988	0.000136244	0.00307574	1.54905	Down	oncogene	206
TC2100008000.hg.1	GART	phosphoribosylglycinamide formyltransferase, phosphoribosylglycinamide synthetase, phosphoribosylaminoimidazole synthetase	-2.14187	7.66099	-10.3471	1.05731e-05	0.00174206	4.11429	Down		204
TC0100008101.hg.1	KIF2C	kinesin family member 2C	-2.12673	7.52868	-10.188	1.17934e-05	0.00174206	4.00833	Down		204
TC0400006994.hg.1	NCAPG	non-SMC condensin I complex subunit G	-2.11118	7.69586	-8.85661	3.13344e-05	0.00191291	3.04402	Down		202
TC1000006464.hg.1	GTPBP4	GTP binding protein 4	-1.5531	6.261	-7.43248	0.000103295	0.00275444	1.83395	Down		202
TC1200012804.hg.1	PRIM1	DNA primase subunit 1	-1.67506	7.09569	-8.30545	4.87297e-05	0.00209884	2.59976	Down		200
TC0500008777.hg.1	KIF20A	kinesin family member 20A	-1.67014	5.82288	-6.93448	0.00016371	0.00331886	1.35938	Down		200
TC0400008902.hg.1	ABCE1	ATP binding cassette subfamily E member 1	-2.42095	7.86374	-12.0702	3.53508e-06	0.00174206	5.15308	Down		198
TC1400009242.hg.1	WDHD1	WD repeat and HMG-box DNA binding protein 1	-1.89789	5.82096	-6.42287	0.000269931	0.00425351	0.840471	Down		198
TC1900007688.hg.1	CCNE1	cyclin E1	-1.77433	6.61333	-5.56482	0.000668619	0.00722704	-0.107794	Down	oncogene	196
TC0X00007031.hg.1	DDX3X	DEAD-box helicase 3 X-linked	-1.89572	5.72395	-8.05583	5.99979e-05	0.00224471	2.38889	Down	TSG	194
TC0200015463.hg.1	WDR12	WD repeat domain 12	-2.99621	5.26515	-9.49091	1.93834e-05	0.00174206	3.5215	Down		192
TC0300013727.hg.1	NCBP2	nuclear cap binding protein subunit 2	-1.65466	7.26299	-8.08162	5.87081e-05	0.00222007	2.41096	Down		192
TC0200009041.hg.1	DDX18	DEAD-box helicase 18	-2.17743	6.35333	-7.55815	9.23148e-05	0.00261591	1.94921	Down		190
TC1500010463.hg.1	PRC1	protein regulator of cytokinesis 1	-1.69338	7.57154	-7.16219	0.000132218	0.00304664	1.57998	Down		190
TC0X00009160.hg.1	RBBP7	RB binding protein 7, chromatin remodeling factor	-1.66654	7.86099	-6.64852	0.00021574	0.00379486	1.07342	Down		190
TC0100008150.hg.1	RAD54L	RAD54 like	-1.57448	4.95076	-4.82881	0.00157123	0.0122402	-1.00577	Down		190
TC1400007494.hg.1	EIF2S1	eukaryotic translation initiation factor 2 subunit alpha	-2.45349	6.18107	-11.707	4.39896e-06	0.00174206	4.94951	Down		188
TC2000006899.hg.1	XRN2	5'-3' exoribonuclease 2	-2.1766	6.51986	-10.5662	9.11846e-06	0.00174206	4.25723	Down		188
TC1100011030.hg.1	DDB1	damage specific DNA binding protein 1	-2.0091	8.17694	-7.34452	0.000111848	0.00283373	1.75222	Down		188
TC1500008252.hg.1	FANCI	FA complementation group I	-2.43152	4.57333	-9.15225	2.49611e-05	0.00181206	3.27087	Down		186
TC0200016445.hg.1	MSH6	mutS homolog 6	-2.42984	6.47656	-7.80189	7.45453e-05	0.00241865	2.16783	Down	TSG	186
TC1200010650.hg.1	RACGAP1	Rac GTPase activating protein 1	-1.95508	6.65148	-7.03411	0.000149004	0.00319119	1.45666	Down		186
TC0400008882.hg.1	SMARCA5	SWI/SNF related, matrix associated, actin dependent regulator of chromatin, subfamily a, member 5	-1.74451	7.59397	-6.9223	0.000165617	0.00333214	1.3474	Down		186
TC0400012618.hg.1	CASP3	caspase 3	-2.82107	5.26485	-10.1422	1.21732e-05	0.00174206	3.97751	Down	TSG	184
TC1700010721.hg.1	STAT3	signal transducer and activator of transcription 3	-1.75293	6.48828	-8.2195	5.23172e-05	0.00213526	2.52786	Down	oncogene	184
TC2200007486.hg.1	XRCC6	X-ray repair cross complementing 6	-1.73556	9.21851	-7.33704	0.000112611	0.00284392	1.74523	Down		182
TC0500007122.hg.1	BRIX1	biogenesis of ribosomes BRX1	-1.73054	7.43909	-6.74859	0.000195684	0.00360723	1.17464	Down		182
TC0700010538.hg.1	HNRNPA2B1	heterogeneous nuclear ribonucleoprotein A2/B1	-2.07623	8.74663	-10.1358	1.22277e-05	0.00174206	3.97316	Down	oncogene, fusion	180
TC0300012665.hg.1	XRN1	5'-3' exoribonuclease 1	-1.72951	4.78702	-5.60664	0.000638337	0.00706011	-0.0591767	Down		180
TC0100011581.hg.1	CENPF	centromere protein F	-2.19001	6.54703	-9.99285	1.35119e-05	0.00174206	3.87582	Down		178
TC0200008502.hg.1	NCAPH	non-SMC condensin I complex subunit H	-1.69219	7.05086	-7.88863	6.91737e-05	0.00234878	2.24409	Down		178
TC0100017528.hg.1	PARP1	poly(ADP-ribose) polymerase 1	-1.84807	7.20793	-7.30516	0.00011593	0.00288244	1.71536	Down		178
TC1000011499.hg.1	ALDH18A1	aldehyde dehydrogenase 18 family member A1	-1.5309	7.22067	-7.0651	0.000144734	0.00314044	1.48668	Down		178
TC0800007209.hg.1	WRN	WRN RecQ like helicase	-2.53725	4.33347	-9.10723	2.58301e-05	0.0018291	3.23682	Down	TSG	176
TC0X00007537.hg.1	KIF4A	kinesin family member 4A	-1.87513	5.38421	-8.86078	3.12327e-05	0.00191291	3.04727	Down		176
TC1100012984.hg.1	NAT10	N-acetyltransferase 10	-2.33891	6.42765	-11.6612	4.52407e-06	0.00174206	4.92326	Down		174
TC0100010397.hg.1	NUF2	NUF2 component of NDC80 kinetochore complex	-2.16751	6.25459	-10.1484	1.21209e-05	0.00174206	3.9817	Down		174
TC0700007630.hg.1	CCT6A	chaperonin containing TCP1 subunit 6A	-1.87793	8.66008	-8.25287	5.08901e-05	0.00212427	2.55586	Down		174
TC0100015994.hg.1	CCT3	chaperonin containing TCP1 subunit 3	-1.5733	8.83652	-7.28567	0.000118012	0.00290382	1.69704	Down		174
TC1200011916.hg.1	PPP1CC	protein phosphatase 1 catalytic subunit gamma	-2.04561	9.45057	-9.1052	2.587e-05	0.0018291	3.23528	Down		170
TC0600007207.hg.1	GMNN	geminin DNA replication inhibitor	-1.58524	6.99065	-8.04928	6.03304e-05	0.00224471	2.38327	Down		170
TC2100007854.hg.1	CCT8	chaperonin containing TCP1 subunit 8	-1.63046	9.18131	-7.70548	8.10713e-05	0.0025175	2.08212	Down		170
TC0800008484.hg.1	DCAF13	DDB1 and CUL4 associated factor 13	-1.63326	7.13558	-6.79062	0.000187887	0.00353097	1.21679	Down		170
TC0300006575.hg.1	FANCD2	FA complementation group D2	-2.07829	6.37927	-5.41096	0.000794494	0.00797285	-0.288845	Down	TSG	170
TC1400007300.hg.1	PSMA3	proteasome 20S subunit alpha 3	-2.32351	5.76545	-10.7607	8.01411e-06	0.00174206	4.38127	Down		168
TC0800011148.hg.1	CCNE2	cyclin E2	-1.57848	5.50568	-7.96542	6.47775e-05	0.00227915	2.31095	Down		168
TC1100007833.hg.1	INCENP	inner centromere protein	-1.52374	7.30957	-6.86828	0.000174375	0.00340503	1.29408	Down		168
TC0100013455.hg.1	RPA2	replication protein A2	-2.02756	6.55316	-6.01009	0.000412921	0.00541726	0.396998	Down		168
TC0300007223.hg.1	KIF15	kinesin family member 15	-1.65886	5.34323	-5.78256	0.000526578	0.00625853	0.142559	Down		168
TC0400012934.hg.1	SDAD1	SDA1 domain containing 1	-2.00961	5.20482	-5.13588	0.00109012	0.00972725	-0.621259	Down		168
TC0300009357.hg.1	NMD3	NMD3 ribosome export adaptor	-1.80621	7.08585	-8.76495	3.36672e-05	0.00193361	2.9721	Down		166
TC1100010887.hg.1	SSRP1	structure specific recognition protein 1	-1.74913	8.59789	-7.94815	6.57381e-05	0.00229303	2.29597	Down		166
TC0500006472.hg.1	TRIP13	thyroid hormone receptor interactor 13	-2.04544	6.08996	-7.07867	0.000142908	0.0031333	1.49978	Down		166
TC0300006791.hg.1	KAT2B	lysine acetyltransferase 2B	-1.66389	5.98916	-6.65237	0.000214928	0.00379133	1.07733	Down		166
TC0100009020.hg.1	CDC7	cell division cycle 7	-1.88188	5.68944	-5.83858	0.000495684	0.00605122	0.205877	Down		166
TC1700010328.hg.1	UTP6	UTP6 small subunit processome component	-2.10154	4.80793	-10.4657	9.75573e-06	0.00174206	4.19208	Down		164
TC1200009209.hg.1	KNTC1	kinetochore associated 1	-2.03162	5.87052	-7.67848	8.30118e-05	0.00252707	2.05794	Down		164
TC1000007396.hg.1	BMS1	BMS1 ribosome biogenesis factor	-1.50586	5.84283	-7.43575	0.000102992	0.00274973	1.83697	Down		164
TC0700013290.hg.1	NCAPG2	non-SMC condensin II complex subunit G2	-1.55499	6.92107	-7.14726	0.000134062	0.00305552	1.5657	Down		164
TC0100017216.hg.1	NEK2	NIMA related kinase 2	-1.90004	7.28235	-7.12698	0.000136612	0.00307752	1.54627	Down		164
TC2000007633.hg.1	DDX27	DEAD-box helicase 27	-1.53917	5.75983	-7.01209	0.000152122	0.003222	1.43526	Down		164
TC1000008482.hg.1	CEP55	centrosomal protein 55	-1.80921	4.19286	-6.35761	0.000288311	0.00441513	0.771876	Down		164
TC1100010418.hg.1	KIF18A	kinesin family member 18A	-2.12445	5.42346	-10.0286	1.3177e-05	0.00174206	3.90032	Down		162
TC1000007876.hg.1	DDX21	DExD-box helicase 21	-1.9196	8.56417	-8.09659	5.79732e-05	0.00221261	2.42375	Down		162
TC0700006549.hg.1	EIF3B	eukaryotic translation initiation factor 3 subunit B	-1.55285	6.88564	-6.98083	0.000156676	0.00326061	1.40479	Down		162
TC1200010917.hg.1	TIMELESS	timeless circadian regulator	-1.63917	6.11601	-6.45635	0.000261007	0.00419817	0.875455	Down		162
TC0700011510.hg.1	RFC2	replication factor C subunit 2	-1.70939	7.118	-5.98501	0.000424005	0.00548748	0.369303	Down		162
TC0300009524.hg.1	ECT2	epithelial cell transforming 2	-1.99276	4.28035	-9.11322	2.57126e-05	0.0018291	3.24136	Down		160
TC1400009248.hg.1	DLGAP5	DLG associated protein 5	-1.94179	7.63651	-6.94473	0.000162125	0.00331151	1.36944	Down		160
TC0500008308.hg.1	WDR36	WD repeat domain 36	-2.71871	5.11652	-6.88289	0.000171957	0.00338912	1.30854	Down		160
TC0300009597.hg.1	PIK3CA	phosphatidylinositol-4,5-bisphosphate 3-kinase catalytic subunit alpha	-1.59541	6.66215	-6.51243	0.000246791	0.00406438	0.93371	Down	oncogene	160
TC1200006627.hg.1	NCAPD2	non-SMC condensin I complex subunit D2	-1.97742	5.8565	-9.35838	2.13798e-05	0.00176109	3.42457	Down		158
TC0900007129.hg.1	MELK	maternal embryonic leucine zipper kinase	-1.54228	6.4882	-6.28868	0.000309251	0.00459071	0.698814	Down		158
TC0100014344.hg.1	MYSM1	Myb like, SWIRM and MPN domains 1	-1.56567	6.30864	-7.07798	0.000143001	0.00313375	1.49911	Down		156
TC0100017860.hg.1	HEATR1	HEAT repeat containing 1	-1.66091	6.49512	-6.1949	0.000340509	0.00485936	0.598385	Down		156
TC0100016891.hg.1	KIF14	kinesin family member 14	-2.57297	5.19969	-4.85373	0.00152454	0.012005	-0.974032	Down		156
TC0800011679.hg.1	ATAD2	ATPase family AAA domain containing 2	-2.58237	6.42146	-9.58605	1.80793e-05	0.00174206	3.5902	Down		154
TC0600014322.hg.1	SYNCRIP	synaptotagmin binding cytoplasmic RNA interacting protein	-1.87787	7.00123	-9.26363	2.2949e-05	0.00178222	3.35436	Down		154
TC0100010858.hg.1	DHX9	DExH-box helicase 9	-1.84851	4.61495	-8.71401	3.50476e-05	0.00193732	2.9318	Down		154
TC0500008544.hg.1	LMNB1	lamin B1	-1.69839	7.10924	-8.32266	4.80446e-05	0.00209619	2.61407	Down		154
TC1000008684.hg.1	BTRC	beta-transducin repeat containing E3 ubiquitin protein ligase	-1.75935	5.0391	-5.51029	0.000710509	0.00748837	-0.171557	Down		154
TC1300007137.hg.1	RB1	RB transcriptional corepressor 1	-2.11837	6.63156	-9.50414	1.9196e-05	0.00174206	3.53109	Down	TSG	152
TC0300012475.hg.1	TOPBP1	DNA topoisomerase II binding protein 1	-2.07476	6.11053	-8.87403	3.0912e-05	0.00191291	3.0576	Down		152
TC1800007155.hg.1	PIK3C3	phosphatidylinositol 3-kinase catalytic subunit type 3	-2.3912	3.58298	-8.45162	4.32437e-05	0.00203346	2.72038	Down		152
TC0600013602.hg.1	FBXO5	F-box protein 5	-2.18582	7.14768	-6.55604	0.000236329	0.00397974	0.97874	Down		152
TC1000010847.hg.1	DNA2	DNA replication helicase/nuclease 2	-2.02085	4.94504	-9.74186	1.61511e-05	0.00174206	3.70113	Down		150
TC0800007554.hg.1	UBE2V2	ubiquitin conjugating enzyme E2 V2	-1.88169	6.95022	-9.0601	2.67764e-05	0.00186656	3.20099	Down		150
TC0700009585.hg.1	CUL1	cullin 1	-2.23967	5.59138	-8.73676	3.44234e-05	0.00193574	2.94983	Down		150
TC0300006784.hg.1	RAB5A	RAB5A, member RAS oncogene family	-1.59304	9.19851	-7.65436	8.4789e-05	0.00253678	2.03627	Down		150
TC0300009701.hg.1	PSMD2	proteasome 26S subunit ubiquitin receptor, non-ATPase 2	-1.85809	6.46651	-7.29266	0.00011726	0.00289298	1.70362	Down		150
TC1700008283.hg.1	UTP18	UTP18 small subunit processome component	-2.81079	4.53773	-10.2596	1.12258e-05	0.00174206	4.05623	Down		148
TC0200015887.hg.1	CUL3	cullin 3	-2.0522	6.12189	-8.56408	3.9493e-05	0.00198747	2.81179	Down	TSG	148
TC0400006591.hg.1	HTT	huntingtin	-1.53128	5.87131	-7.12993	0.000136238	0.00307574	1.5491	Down		148
TC0200007886.hg.1	PNO1	partner of NOB1 homolog	-1.54748	5.36501	-6.7438	0.000196596	0.00361272	1.16983	Down		148
TC0900006473.hg.1	SMARCA2	SWI/SNF related, matrix associated, actin dependent regulator of chromatin, subfamily a, member 2	-1.95134	3.83643	-4.75039	0.00172872	0.0130177	-1.10627	Down		148
TC1100007874.hg.1	POLR2G	RNA polymerase II subunit G	-1.59946	5.29383	-4.65699	0.00193927	0.0140641	-1.22719	Down		148
TC0500008349.hg.1	YTHDC2	YTH domain containing 2	-1.91775	4.90415	-8.19642	5.33305e-05	0.00214856	2.50842	Down		146
TC1500010757.hg.1	RAB11A	RAB11A, member RAS oncogene family	-1.99551	8.00225	-8.19174	5.35385e-05	0.00214962	2.50447	Down		146
TC2000008439.hg.1	ESF1	ESF1 nucleolar pre-rRNA processing protein homolog	-1.51445	5.55997	-7.38824	0.000107502	0.00279511	1.79295	Down		146
TC0500012179.hg.1	ETF1	eukaryotic translation termination factor 1	-2.34206	6.54431	-11.0576	6.60651e-06	0.00174206	4.56574	Down		144
TC1700008465.hg.1	CLTC	clathrin heavy chain	-1.78651	8.90988	-7.54505	9.33959e-05	0.00263452	1.93728	Down	TSG, fusion	144
TC1100010551.hg.1	TRAF6	TNF receptor associated factor 6	-2.06268	4.81645	-7.38385	0.00010793	0.00279626	1.78887	Down		142
TC1600008275.hg.1	SF3B3	splicing factor 3b subunit 3	-1.80491	6.72939	-6.39951	0.000276355	0.00431397	0.815982	Down		142
TC0500009320.hg.1	HMMR	hyaluronan mediated motility receptor	-2.02256	5.64802	-6.24351	0.00032389	0.00471774	0.650586	Down		142
TC1200008748.hg.1	PWP1	PWP1 homolog, endonuclein	-1.58653	5.99279	-7.65881	8.44579e-05	0.00253335	2.04028	Down		140
TC0400012143.hg.1	FBXW7	F-box and WD repeat domain containing 7	-1.61282	3.78258	-7.04862	0.000146988	0.00316302	1.47073	Down	TSG	140
TC1500008751.hg.1	UBE3A	ubiquitin protein ligase E3A	-2.0596	5.50034	-6.70911	0.000203338	0.00365505	1.13485	Down		140
TC1000011469.hg.1	NOC3L	NOC3 like DNA replication regulator	-1.51447	3.73687	-6.47365	0.000256528	0.00415882	0.893465	Down		140
TC1500007616.hg.1	ZWILCH	zwilch kinetochore protein	-2.05957	4.13566	-5.71942	0.000563982	0.00652027	0.0706623	Down		140
TC1200011301.hg.1	KRR1	KRR1 small subunit processome component homolog	-1.89914	6.07692	-9.56322	1.83831e-05	0.00174206	3.57377	Down		138
TC0200012260.hg.1	CEBPZ	CCAAT enhancer binding protein zeta	-1.64295	5.50684	-8.27861	4.98192e-05	0.00211003	2.57739	Down		138
TC0400009746.hg.1	SLBP	stem-loop binding protein	-1.5762	7.00931	-6.71583	0.000202013	0.00364704	1.14164	Down		138
TC1500010880.hg.1	TIPIN	TIMELESS interacting protein	-2.07241	4.16839	-9.54998	1.85618e-05	0.00174206	3.56424	Down		136
TC0500007641.hg.1	PIK3R1	phosphoinositide-3-kinase regulatory subunit 1	-2.35175	4.69416	-8.49278	4.18266e-05	0.00200215	2.75398	Down	TSG	136
TC0500007673.hg.1	RAD17	RAD17 checkpoint clamp loader component	-3.05766	5.74024	-8.21216	5.2637e-05	0.00213526	2.52168	Down	TSG	136
TC1000009244.hg.1	BCCIP	BRCA2 and CDKN1A interacting protein	-1.64701	6.61051	-6.09988	0.000375804	0.00513032	0.495419	Down		136
TC0600007700.hg.1	KIFC1	kinesin family member C1	-1.6271	7.2189	-5.28482	0.000917343	0.00870083	-0.439874	Down		136
TC0200006788.hg.1	DDX1	DEAD-box helicase 1	-2.19959	6.5026	-6.95912	0.000159927	0.00329041	1.38355	Down		134
TC2000008310.hg.1	TRMT6	tRNA methyltransferase 6	-1.83331	5.16875	-5.99339	0.000420265	0.0054593	0.378568	Down		134
TC0300009609.hg.1	ACTL6A	actin like 6A	-1.95298	5.5723	-9.83907	1.50656e-05	0.00174206	3.76937	Down		132
TC0600014139.hg.1	PRIM2	DNA primase subunit 2	-2.28389	5.17621	-7.62757	8.68127e-05	0.00255679	2.01214	Down		132
TC0200008587.hg.1	EIF5B	eukaryotic translation initiation factor 5B	-1.91339	6.80641	-6.98309	0.000156342	0.00325811	1.40699	Down		132
TC0300009313.hg.1	GFM1	G elongation factor mitochondrial 1	-1.57078	5.79764	-5.59511	0.000646529	0.00710975	-0.0725514	Down		132
TC1900006896.hg.1	HNRNPM	heterogeneous nuclear ribonucleoprotein M	-2.29094	8.02648	-10.6446	8.65414e-06	0.00174206	4.30752	Down		130
TC0X00008392.hg.1	UTP14A	UTP14A small subunit processome component	-1.78505	4.4889	-8.75083	3.40437e-05	0.00193574	2.96095	Down		130
TC1500007979.hg.1	PSMA4	proteasome 20S subunit alpha 4	-1.72985	7.57039	-7.64747	8.5304e-05	0.00254517	2.03008	Down		130
TC0400008443.hg.1	LARP7	La ribonucleoprotein 7, transcriptional regulator	-2.51223	5.31521	-7.06043	0.000145369	0.00314551	1.48216	Down		130
TC1400007625.hg.1	RBM25	RNA binding motif protein 25	-1.52269	5.85692	-6.91356	0.000166999	0.00334399	1.33881	Down		130
TC2100008508.hg.1	CHAF1B	chromatin assembly factor 1 subunit B	-1.53973	6.54913	-6.33895	0.000293819	0.00445832	0.752162	Down		130
TC0100018068.hg.1	TFB2M	transcription factor B2, mitochondrial	-1.84237	6.38478	-5.38315	0.000819926	0.00812343	-0.321935	Down		130
TC0200011051.hg.1	PSMD1	proteasome 26S subunit, non-ATPase 1	-2.02236	7.02049	-10.1225	1.23408e-05	0.00174206	3.9642	Down		128
TC0500009996.hg.1	NSUN2	NOP2/Sun RNA methyltransferase 2	-1.95785	5.10145	-8.80086	3.27308e-05	0.00192546	3.00037	Down		128
TC0700013619.hg.1	RBM28	RNA binding motif protein 28	-2.1509	4.65747	-5.13274	0.00109412	0.0097432	-0.62511	Down		128
TC0600012863.hg.1	REV3L	REV3 like, DNA directed polymerase zeta catalytic subunit	-2.24539	3.40324	-9.99558	1.3486e-05	0.00174206	3.87769	Down		126
TC2000007857.hg.1	RAE1	ribonucleic acid export 1	-1.84341	6.36442	-8.94992	2.91443e-05	0.00188708	3.11645	Down		126
TC0300007033.hg.1	MLH1	mutL homolog 1	-1.97051	6.24159	-8.48088	4.22308e-05	0.00200629	2.74428	Down	TSG	126
TC1000011988.hg.1	EIF3A	eukaryotic translation initiation factor 3 subunit A	-1.58686	8.24243	-7.69915	8.15213e-05	0.00252283	2.07646	Down		126
TC0100018569.hg.1	HNRNPU	heterogeneous nuclear ribonucleoprotein U	-1.52697	10.2988	-7.51579	9.58628e-05	0.00266475	1.91056	Down		126
TC0700008263.hg.1	DBF4	DBF4 zinc finger	-2.01495	5.64567	-10.2274	1.14775e-05	0.00174206	4.03471	Down		124
TC0100017059.hg.1	RBBP5	RB binding protein 5, histone lysine methyltransferase complex subunit	-1.70237	6.40836	-8.57404	3.9179e-05	0.00198378	2.81983	Down		124
TC1400010596.hg.1	PSMA6	proteasome 20S subunit alpha 6	-2.05539	8.05291	-7.34446	0.000111854	0.00283373	1.75217	Down		124
TC1700008575.hg.1	PSMC5	proteasome 26S subunit, ATPase 5	-1.93151	7.14737	-7.09227	0.000141104	0.00311768	1.5129	Down		124
TC0100007786.hg.1	AGO1	argonaute RISC component 1	-2.07037	6.3042	-8.21045	5.27119e-05	0.00213526	2.52024	Down		122
TC0200016422.hg.1	PPP1CB	protein phosphatase 1 catalytic subunit beta	-1.61512	7.40366	-8.02397	6.16357e-05	0.00225559	2.36152	Down		122
TC0500012282.hg.1	HDAC3	histone deacetylase 3	-1.92013	7.60996	-7.62509	8.70029e-05	0.00255719	2.0099	Down		122
TC0200014167.hg.1	ERCC3	ERCC excision repair 3, TFIIH core complex helicase subunit	-1.83999	5.38686	-6.05574	0.000393564	0.00525546	0.447178	Down	TSG	122
TC1700012342.hg.1	DHX33	DEAH-box helicase 33	-1.59214	4.00421	-5.04433	0.00121395	0.0104171	-0.734396	Down		122
TC0200016637.hg.1	SMC6	structural maintenance of chromosomes 6	-2.02905	5.59399	-9.91414	1.42834e-05	0.00174206	3.82156	Down		120
TC1600010168.hg.1	SHCBP1	SHC binding and spindle associated 1	-2.80583	5.74712	-8.82488	3.21207e-05	0.00191652	3.01921	Down		120
TC1000012164.hg.1	DHX32	DEAH-box helicase 32 (putative)	-2.24253	4.93762	-7.83884	7.22017e-05	0.00239635	2.20042	Down		120
TC1200008916.hg.1	PTPN11	protein tyrosine phosphatase non-receptor type 11	-1.66278	7.80747	-7.23668	0.000123434	0.00296326	1.65081	Down	oncogene	120
TC0300013684.hg.1	TFRC	transferrin receptor	-1.5189	10.3204	-7.15869	0.000132648	0.00304704	1.57664	Down		120
TC2000009959.hg.1	CSNK2A1	casein kinase 2 alpha 1	-1.58722	9.39134	-6.97038	0.000158233	0.00327215	1.39457	Down		120
TC1700007478.hg.1	NF1	neurofibromin 1	-2.91487	4.98537	-12.0438	3.59104e-06	0.00174206	5.13852	Down	TSG, fusion	118
TC0400010484.hg.1	PDS5A	PDS5 cohesin associated factor A	-2.29818	7.33456	-10.1709	1.19338e-05	0.00174206	3.99682	Down		118
TC1200010105.hg.1	RECQL	RecQ like helicase	-2.35831	4.72161	-7.814	7.37682e-05	0.00241328	2.17852	Down		118
TC0300013908.hg.1	FXR1	FMR1 autosomal homolog 1	-1.50005	9.2003	-7.27669	0.000118986	0.00290609	1.68859	Down		118
TC2000006628.hg.1	MCM8	minichromosome maintenance 8 homologous recombination repair factor	-1.59898	8.14666	-6.71756	0.000201672	0.00364704	1.14339	Down		118
TC0100016709.hg.1	TPR	translocated promoter region, nuclear basket protein	-1.51336	7.37125	-6.04085	0.000399766	0.00530629	0.430839	Down		118
TC0700013162.hg.1	PAXIP1	PAX interacting protein 1	-1.65577	6.97274	-4.64872	0.00195923	0.0141416	-1.23796	Down		118
TC0300010299.hg.1	RAF1	Raf-1 proto-oncogene, serine/threonine kinase	-1.60884	5.99812	-8.15845	5.50454e-05	0.00217042	2.47633	Down	oncogene, fusion	116
TC0600012764.hg.1	SEC63	SEC63 homolog, protein translocation regulator	-1.67807	7.46296	-8.1461	5.56163e-05	0.00217561	2.46587	Down		116
TC0100006840.hg.1	TARDBP	TAR DNA binding protein	-2.03287	7.54428	-7.38603	0.000107717	0.00279511	1.7909	Down		116
TC0900010578.hg.1	UBQLN1	ubiquilin 1	-1.61988	8.03113	-6.37682	0.000282761	0.00436929	0.792122	Down		116
TC0300007739.hg.1	PSMC1	proteasome 26S subunit, ATPase 1	-1.64991	5.82142	-5.94319	0.000443228	0.0056245	0.322932	Down		116
TC0900006538.hg.1	JAK2	Janus kinase 2	-1.74722	5.49542	-5.46736	0.000745538	0.00771337	-0.22207	Down	oncogene, fusion	116
TC0100014543.hg.1	DEPDC1	DEP domain containing 1	-2.12211	5.55366	-10.4367	9.9489e-06	0.00174206	4.17314	Down		114
TC1700011523.hg.1	PSMD12	proteasome 26S subunit, non-ATPase 12	-1.77698	7.19629	-7.4155	0.000104888	0.00276899	1.81824	Down		114
TC1200011720.hg.1	NUP37	nucleoporin 37	-1.55964	6.00521	-6.75824	0.000193864	0.00359385	1.18433	Down		114
TC0600014189.hg.1	LTV1	LTV1 ribosome biogenesis factor	-2.0576	5.68727	-5.81629	0.000507725	0.00614307	0.180745	Down		114
TC0900011021.hg.1	TEX10	testis expressed 10	-1.57554	6.24341	-5.80165	0.000515815	0.00619162	0.164189	Down		114
TC0X00010675.hg.1	CUL4B	cullin 4B	-2.36449	6.67161	-8.80271	3.26834e-05	0.00192546	3.00182	Down		112
TC0200014845.hg.1	SPC25	SPC25 component of NDC80 kinetochore complex	-1.91871	6.12713	-8.12419	5.66458e-05	0.00219172	2.44726	Down		112
TC1000008056.hg.1	VCL	vinculin	-1.85936	8.30983	-7.45406	0.00010131	0.00272495	1.85387	Down		112
TC0100015196.hg.1	PSMA5	proteasome 20S subunit alpha 5	-1.78916	7.65693	-6.50579	0.000248428	0.00407429	0.926837	Down		112
TC1800007316.hg.1	SKA1	spindle and kinetochore associated complex subunit 1	-1.60773	6.38349	-5.83165	0.000499394	0.00607445	0.198068	Down		112
TC0100018440.hg.1	STIL	STIL centriolar assembly protein	-1.84746	6.62394	-5.75905	0.000540175	0.00636193	0.115855	Down	oncogene, fusion	112
TC0200011726.hg.1	NOL10	nucleolar protein 10	-2.25458	4.54094	-10.2911	1.09861e-05	0.00174206	4.07717	Down		110
TC0500008641.hg.1	RAD50	RAD50 double strand break repair protein	-1.79984	7.63319	-8.85686	3.13284e-05	0.00191291	3.04421	Down		110
TC0900011803.hg.1	SETX	senataxin	-1.9067	3.35008	-8.8155	3.23576e-05	0.001919	3.01185	Down		110
TC1600007521.hg.1	FUS	FUS RNA binding protein	-1.82392	8.09102	-8.34166	4.73013e-05	0.00208896	2.62983	Down	TSG, fusion	110
TC1000007564.hg.1	MAPK8	mitogen-activated protein kinase 8	-1.89933	7.25779	-8.22279	5.21745e-05	0.00213526	2.53062	Down		110
TC0400009856.hg.1	LYAR	Ly1 antibody reactive	-1.89388	6.20112	-8.01585	6.2061e-05	0.00226213	2.35453	Down		110
TC0100013760.hg.1	SF3A3	splicing factor 3a subunit 3	-1.9161	8.04887	-7.99751	6.3034e-05	0.00227246	2.33871	Down		110
TC1300009232.hg.1	DIS3	DIS3 homolog, exosome endoribonuclease and 3'-5' exoribonuclease	-1.79168	7.00627	-7.63526	8.62269e-05	0.00255107	2.01907	Down		110
TC2000007627.hg.1	CSE1L	chromosome segregation 1 like	-1.55723	8.52674	-7.60155	8.88308e-05	0.00257431	1.98862	Down		110
TC0400008388.hg.1	GAR1	GAR1 ribonucleoprotein	-1.91885	6.10402	-7.22755	0.000124474	0.00296376	1.64217	Down		110
TC0100010903.hg.1	RNF2	ring finger protein 2	-1.61626	7.4478	-4.9052	0.00143286	0.0115705	-0.908781	Down		110
TC2000007386.hg.1	PLCG1	phospholipase C gamma 1	-2.47032	4.56018	-10.0975	1.25577e-05	0.00174206	3.94724	Down	oncogene, fusion	108
TC0300012764.hg.1	HLTF	helicase like transcription factor	-1.91898	6.41441	-9.48883	1.9413e-05	0.00174206	3.51999	Down		108
TC0X00008330.hg.1	XIAP	X-linked inhibitor of apoptosis	-2.23088	3.76956	-9.3281	2.18678e-05	0.00176109	3.40221	Down		108
TC1200008113.hg.1	NUP107	nucleoporin 107	-1.81417	5.67929	-8.67356	3.61889e-05	0.00195402	2.89963	Down		108
TC1200008642.hg.1	PARPBP	PARP1 binding protein	-1.50318	5.60096	-7.01714	0.0001514	0.00321241	1.44018	Down		108
TC0500010515.hg.1	NUP155	nucleoporin 155	-1.77047	8.03302	-6.81243	0.000183979	0.00349477	1.23856	Down		108
TC0X00008668.hg.1	FMR1	FMRP translational regulator 1	-2.45511	5.48555	-6.63617	0.000218371	0.00382256	1.06083	Down		108
TC0800010043.hg.1	PPP2CB	protein phosphatase 2 catalytic subunit beta	-2.43656	6.27786	-6.15842	0.000353603	0.00496309	0.559004	Down		108
TC1300008125.hg.1	LAMP1	lysosomal associated membrane protein 1	-1.8392	5.35475	-5.35389	0.000847664	0.00826382	-0.35688	Down		108
TC0600007825.hg.1	MAPK14	mitogen-activated protein kinase 14	-3.06357	5.50601	-9.18764	2.4301e-05	0.0018017	3.29752	Down		106
TC0200012642.hg.1	MTIF2	mitochondrial translational initiation factor 2	-1.88435	7.0137	-8.82668	3.20755e-05	0.00191652	3.02062	Down		106
TC0400007293.hg.1	UBE2K	ubiquitin conjugating enzyme E2 K	-1.71327	7.49865	-8.11501	5.70839e-05	0.00219692	2.43944	Down		106
TC0900012124.hg.1	POLR1E	RNA polymerase I subunit E	-1.6183	6.58107	-6.25525	0.000320014	0.00468232	0.663142	Down		106
TC1000007875.hg.1	DDX50	DExD-box helicase 50	-1.53925	6.8592	-6.07595	0.00038532	0.0052062	0.469297	Down		106
TC0100008554.hg.1	USP1	ubiquitin specific peptidase 1	-2.4148	6.39043	-10.9287	7.18026e-06	0.00174206	4.48637	Down		104
TC0200010624.hg.1	PIKFYVE	phosphoinositide kinase, FYVE-type zinc finger containing	-2.27999	6.01197	-9.86634	1.4776e-05	0.00174206	3.78838	Down		104
TC0400008170.hg.1	SMARCAD1	SWI/SNF-related, matrix-associated actin-dependent regulator of chromatin, subfamily a, containing DEAD/H box 1	-2.40533	4.04109	-9.37309	2.11473e-05	0.00176109	3.43539	Down		104
TC1400008007.hg.1	CPSF2	cleavage and polyadenylation specific factor 2	-2.11576	5.86637	-9.23183	2.35043e-05	0.0017916	3.33063	Down		104
TC0200006647.hg.1	CPSF3	cleavage and polyadenylation specific factor 3	-1.76708	6.76263	-8.85059	3.14819e-05	0.00191489	3.03932	Down		104
TC0300011158.hg.1	WDR82	WD repeat domain 82	-1.84596	5.83605	-8.16549	5.47229e-05	0.00216313	2.48229	Down		104
TC0400009936.hg.1	GRPEL1	GrpE like 1, mitochondrial	-1.62091	7.01833	-7.92553	6.70208e-05	0.0023073	2.2763	Down		104
TC1100007210.hg.1	EIF3M	eukaryotic translation initiation factor 3 subunit M	-1.69345	8.80882	-7.41608	0.000104833	0.00276899	1.81877	Down		104
TC0900007740.hg.1	RMI1	RecQ mediated genome instability 1	-3.14294	4.55555	-12.9648	2.11469e-06	0.00174206	5.62336	Down		102
TC0200015099.hg.1	CWC22	CWC22 spliceosome associated protein homolog	-2.15928	7.128	-10.1492	1.21144e-05	0.00174206	3.98222	Down		102
TC0100016685.hg.1	TRMT1L	tRNA methyltransferase 1 like	-2.01261	5.45479	-9.82328	1.52363e-05	0.00174206	3.75833	Down		102
TC1100010290.hg.1	E2F8	E2F transcription factor 8	-2.1838	3.90383	-9.69444	1.67123e-05	0.00174206	3.66757	Down		102
TC0400012179.hg.1	PLRG1	pleiotropic regulator 1	-2.02603	5.83583	-9.26659	2.2898e-05	0.00178211	3.35657	Down		102
TC1200008003.hg.1	TBK1	TANK binding kinase 1	-2.74204	4.00335	-9.02634	2.74782e-05	0.00187856	3.1752	Down		102
TC0100009428.hg.1	DDX20	DEAD-box helicase 20	-1.75232	4.59908	-8.62875	3.75025e-05	0.00197512	2.86381	Down		102
TC0400007879.hg.1	USO1	USO1 vesicle transport factor	-1.6986	9.4495	-8.22018	5.22877e-05	0.00213526	2.52843	Down		102
TC1300007248.hg.1	CKAP2	cytoskeleton associated protein 2	-1.53426	6.40019	-7.59141	8.96313e-05	0.00258443	1.97943	Down		102
TC1700006775.hg.1	CHD3	chromodomain helicase DNA binding protein 3	-2.06097	5.71931	-5.55414	0.000676605	0.00727352	-0.120251	Down		102
TC0400007923.hg.1	MRPL1	mitochondrial ribosomal protein L1	-2.0071	5.37007	-4.91373	0.00141825	0.0114926	-0.898003	Down		102
TC1300006810.hg.1	PDS5B	PDS5 cohesin associated factor B	-1.55443	5.21969	-4.75525	0.00171848	0.0129688	-1.10002	Down		102
TC0600014362.hg.1	TFB1M	transcription factor B1, mitochondrial	-2.06533	3.72639	-10.0503	1.29786e-05	0.00174206	3.91511	Down		100
TC0200015578.hg.1	IDH1	isocitrate dehydrogenase (NADP(+)) 1	-1.91705	7.03464	-9.31493	2.2084e-05	0.00176109	3.39246	Down	oncogene	100
TC0100011027.hg.1	CDC73	cell division cycle 73	-2.00051	5.98812	-9.31378	2.21029e-05	0.00176109	3.39162	Down	TSG	100
TC1000010249.hg.1	KIF5B	kinesin family member 5B	-1.70887	7.95375	-7.9258	6.70054e-05	0.0023073	2.27653	Down		100
TC0900007167.hg.1	DCAF10	DDB1 and CUL4 associated factor 10	-2.22845	5.7011	-7.09385	0.000140895	0.00311768	1.51442	Down		100
TC0600011375.hg.1	DHX16	DEAH-box helicase 16	-1.76307	5.74376	-6.00931	0.000413261	0.00542008	0.396138	Down		100
TC2100007597.hg.1	HSPA13	heat shock protein family A (Hsp70) member 13	-2.0515	6.37034	-9.3254	2.19119e-05	0.00176109	3.40021	Down		98
TC1000012528.hg.1	NSUN6	NOP2/Sun RNA methyltransferase 6	-1.8421	3.23789	-9.26998	2.28398e-05	0.00178211	3.35909	Down		98
TC0100018484.hg.1	MCL1	MCL1 apoptosis regulator, BCL2 family member	-2.27154	7.87378	-9.20271	2.40259e-05	0.00180035	3.30883	Down		98
TC0800007949.hg.1	TERF1	telomeric repeat binding factor 1	-2.32968	7.00074	-9.0454	2.70794e-05	0.00187491	3.18977	Down		98
TC1400007688.hg.1	FCF1	FCF1 rRNA-processing protein	-1.78329	5.42637	-7.76582	7.69155e-05	0.00245345	2.13588	Down		98
TC1600007718.hg.1	ORC6	origin recognition complex subunit 6	-1.57338	5.13313	-7.16408	0.000131987	0.00304458	1.58178	Down		98
TC0100016597.hg.1	STX6	syntaxin 6	-1.90174	6.12417	-6.86874	0.000174299	0.00340503	1.29453	Down		98
TC1500009446.hg.1	LEO1	LEO1 homolog, Paf1/RNA polymerase II complex component	-1.59271	7.16382	-5.84697	0.000491228	0.00601277	0.215329	Down		98
TC0200016684.hg.1	TIA1	TIA1 cytotoxic granule associated RNA binding protein	-1.90342	5.57434	-5.23672	0.000969588	0.00904368	-0.498083	Down		98
TC0200011901.hg.1	PUM2	pumilio RNA binding family member 2	-2.26627	5.52436	-11.5108	4.96324e-06	0.00174206	4.8363	Down		96
TC0100018236.hg.1	ACADM	acyl-CoA dehydrogenase medium chain	-2.238	6.75625	-11.3437	5.50869e-06	0.00174206	4.73803	Down		96
TC1400006890.hg.1	SRP54	signal recognition particle 54	-2.76015	4.51897	-10.6571	8.58224e-06	0.00174206	4.31554	Down		96
TC2000007184.hg.1	ITCH	itchy E3 ubiquitin protein ligase	-2.19768	5.70683	-9.50859	1.91333e-05	0.00174206	3.53432	Down		96
TC0600008735.hg.1	ORC3	origin recognition complex subunit 3	-1.53532	7.69049	-7.79127	7.52346e-05	0.00243408	2.15844	Down		96
TC0300011436.hg.1	SUCLG2	succinate-CoA ligase GDP-forming subunit beta	-1.62554	5.96265	-6.87474	0.000173302	0.00339813	1.30047	Down		96
TC1100013145.hg.1	COPB1	COPI coat complex subunit beta 1	-1.55525	7.16653	-6.62393	0.000221012	0.00385038	1.04835	Down		96
TC1100012303.hg.1	PPP2R1B	protein phosphatase 2 scaffold subunit Abeta	-2.86065	5.48846	-13.1448	1.91459e-06	0.00174206	5.71295	Down		94
TC0200015401.hg.1	ORC2	origin recognition complex subunit 2	-1.96464	6.31241	-8.67359	3.61881e-05	0.00195402	2.89965	Down		94
TC0500013228.hg.1	DDX46	DEAD-box helicase 46	-2.7016	4.97292	-8.53112	4.05531e-05	0.00198916	2.78513	Down		94
TC0100014846.hg.1	GTF2B	general transcription factor IIB	-1.61274	7.2124	-8.0952	5.8041e-05	0.00221261	2.42256	Down		94
TC0200011965.hg.1	ATAD2B	ATPase family AAA domain containing 2B	-2.15146	4.65679	-7.85488	7.12105e-05	0.00238307	2.21451	Down		94
TC0800007653.hg.1	MRPL15	mitochondrial ribosomal protein L15	-1.71104	5.19126	-7.74343	7.84288e-05	0.00248008	2.11598	Down		94
TC0700006980.hg.1	CBX3	chromobox 3	-1.66575	8.4559	-7.5612	9.20648e-05	0.00261053	1.95199	Down		94
TC0300010990.hg.1	SMARCC1	SWI/SNF related, matrix associated, actin dependent regulator of chromatin subfamily c member 1	-2.08097	8.12659	-7.48804	9.82697e-05	0.00269154	1.88513	Down		94
TC0600014127.hg.1	RPL7L1	ribosomal protein L7 like 1	-1.57504	6.08648	-7.09176	0.000141171	0.00311768	1.51241	Down		94
TC0600009112.hg.1	CDC40	cell division cycle 40	-2.03777	5.36422	-6.89987	0.000169193	0.00336772	1.3253	Down		94
TC0300006477.hg.1	ITPR1	inositol 1,4,5-trisphosphate receptor type 1	-1.8178	3.58615	-6.89627	0.000169775	0.00337312	1.32175	Down		94
TC1700007498.hg.1	SUZ12	SUZ12 polycomb repressive complex 2 subunit	-1.82838	6.00821	-6.18665	0.000343422	0.00487848	0.589496	Down	oncogene, TSG, fusion	94
TC1700006556.hg.1	PAFAH1B1	platelet activating factor acetylhydrolase 1b regulatory subunit 1	-1.97461	6.20433	-5.3802	0.000822675	0.00812808	-0.32545	Down		94
TC0200013610.hg.1	REV1	REV1 DNA directed polymerase	-2.21684	4.38194	-9.55195	1.8535e-05	0.00174206	3.56566	Down		92
TC0300007242.hg.1	SACM1L	SAC1 like phosphatidylinositide phosphatase	-1.95133	6.27489	-9.43906	2.01384e-05	0.00174206	3.48375	Down		92
TC0800011314.hg.1	UBR5	ubiquitin protein ligase E3 component n-recognin 5	-3.14762	5.3934	-9.2893	2.25114e-05	0.00177362	3.37346	Down	oncogene	92
TC0100018472.hg.1	SEC22B	SEC22 homolog B, vesicle trafficking protein	-1.99899	6.94705	-8.79748	3.28177e-05	0.00192546	2.99771	Down		92
TC0800011061.hg.1	NBN	nibrin	-1.94022	4.84494	-8.02376	6.16468e-05	0.00225559	2.36133	Down	TSG	92
TC2200007114.hg.1	YWHAH	tyrosine 3-monooxygenase/tryptophan 5-monooxygenase activation protein eta	-1.95009	9.07788	-7.92769	6.68973e-05	0.00230671	2.27818	Down		92
TC1600011292.hg.1	FANCA	FA complementation group A	-1.51317	5.69548	-7.38359	0.000107955	0.00279626	1.78863	Down	TSG	92
TC0900012229.hg.1	EXOSC3	exosome component 3	-1.6083	4.76516	-6.89216	0.000170442	0.00337556	1.31769	Down		92
TC1700007772.hg.1	PSMD3	proteasome 26S subunit, non-ATPase 3	-1.61873	7.66167	-6.83031	0.000180841	0.00346762	1.25638	Down		92
TC0100017664.hg.1	NUP133	nucleoporin 133	-2.9224	4.12852	-6.45575	0.000261165	0.00419914	0.874827	Down		92
TC1700012244.hg.1	CDK12	cyclin dependent kinase 12	-1.62305	5.87899	-5.67361	0.000592957	0.0067175	0.0181501	Down	TSG	92
TC1500008312.hg.1	IQGAP1	IQ motif containing GTPase activating protein 1	-1.70312	8.21984	-5.30389	0.000897491	0.00858045	-0.416886	Down		92
TC0600008099.hg.1	POLH	DNA polymerase eta	-1.5674	5.78786	-7.2821	0.000118399	0.00290555	1.69368	Down		90
TC1500009182.hg.1	VPS39	VPS39 subunit of HOPS complex	-1.62636	5.23139	-6.52985	0.00024255	0.00403587	0.951732	Down		90
TC1400010649.hg.1	VRK1	VRK serine/threonine kinase 1	-1.96204	7.06668	-4.81935	0.00158937	0.0123416	-1.01784	Down		90
TC1700011364.hg.1	BRIP1	BRCA1 interacting helicase 1	-1.8282	4.30547	-4.79671	0.00163371	0.012544	-1.04679	Down	TSG	90
TC1800008231.hg.1	ESCO1	establishment of sister chromatid cohesion N-acetyltransferase 1	-2.45224	5.45269	-11.6246	4.62658e-06	0.00174206	4.90226	Down		88
TC0X00009215.hg.1	EIF1AX	eukaryotic translation initiation factor 1A X-linked	-2.19194	6.56641	-10.4547	9.82871e-06	0.00174206	4.18489	Down		88
TC0800007321.hg.1	ASH2L	ASH2 like, histone lysine methyltransferase complex subunit	-1.81773	7.71902	-7.31364	0.000115037	0.00287838	1.72331	Down		88
TC1700008895.hg.1	NUP85	nucleoporin 85	-1.59736	5.93443	-7.26226	0.000120569	0.00292575	1.67498	Down		88
TC0800007077.hg.1	PPP2R2A	protein phosphatase 2 regulatory subunit Balpha	-1.54768	8.03162	-6.58646	0.000229324	0.003921	1.01001	Down		88
TC0700012159.hg.1	PUS7	pseudouridine synthase 7	-2.32404	3.9384	-6.46923	0.000257663	0.00416289	0.888871	Down		88
TC0600007868.hg.1	RNF8	ring finger protein 8	-1.52461	6.91801	-6.12915	0.000364516	0.00505849	0.52727	Down		88
TC1700010693.hg.1	ACLY	ATP citrate lyase	-1.67535	7.97666	-5.98077	0.000425911	0.00550124	0.364612	Down		88
TC0300013822.hg.1	EXOSC7	exosome component 7	-1.6551	6.07951	-4.87259	0.00149021	0.0118496	-0.950071	Down		88
TC0700008318.hg.1	AKAP9	A-kinase anchoring protein 9	-1.82588	5.44971	-4.66246	0.00192619	0.0140268	-1.22007	Down		88
TC1200010264.hg.1	IPO8	importin 8	-2.09664	5.63723	-9.15688	2.48736e-05	0.00180873	3.27436	Down		86
TC0200009428.hg.1	CCNT2	cyclin T2	-1.80374	6.24089	-8.87663	3.08493e-05	0.00191291	3.05963	Down		86
TC1400008333.hg.1	PPP2R5C	protein phosphatase 2 regulatory subunit B'gamma	-1.71855	8.45162	-8.41985	4.43745e-05	0.00204066	2.69434	Down		86
TC0X00010671.hg.1	LAMP2	lysosomal associated membrane protein 2	-1.61954	6.94509	-7.99548	6.31424e-05	0.00227254	2.33696	Down		86
TC0100018284.hg.1	CHD1L	chromodomain helicase DNA binding protein 1 like	-1.81439	6.42266	-7.72787	7.95006e-05	0.0024955	2.10211	Down		86
TC1200011367.hg.1	PPP1R12A	protein phosphatase 1 regulatory subunit 12A	-1.5083	5.78893	-7.28262	0.000118342	0.00290555	1.69417	Down		86
TC1200006787.hg.1	GABARAPL1	GABA type A receptor associated protein like 1	-1.57488	6.38343	-6.76785	0.000192068	0.00358626	1.19398	Down		86
TC1400006823.hg.1	SCFD1	sec1 family domain containing 1	-1.642	6.09975	-6.10929	0.000372131	0.00510265	0.505677	Down		86
TC0600012731.hg.1	ATG5	autophagy related 5	-1.73835	5.75122	-6.09067	0.000379436	0.00515236	0.485372	Down		86
TC0700008765.hg.1	DLD	dihydrolipoamide dehydrogenase	-2.09538	7.40322	-10.52	9.40561e-06	0.00174206	4.22735	Down		84
TC0100011648.hg.1	IARS2	isoleucyl-tRNA synthetase 2, mitochondrial	-2.51385	7.004	-10.401	1.01924e-05	0.00174206	4.14977	Down		84
TC1400008341.hg.1	DYNC1H1	dynein cytoplasmic 1 heavy chain 1	-2.32162	7.23076	-9.33416	2.17692e-05	0.00176109	3.40669	Down		84
TC2000009026.hg.1	RBL1	RB transcriptional corepressor like 1	-1.80365	5.66735	-9.16957	2.46357e-05	0.00180714	3.28392	Down		84
TC1400009388.hg.1	PPP2R5E	protein phosphatase 2 regulatory subunit B'epsilon	-1.8913	6.82863	-9.04738	2.70384e-05	0.00187491	3.19128	Down		84
TC0500012023.hg.1	KIF3A	kinesin family member 3A	-1.70246	4.01164	-7.9925	6.33027e-05	0.00227303	2.33438	Down		84
TC0X00010346.hg.1	TRMT2B	tRNA methyltransferase 2 homolog B	-1.71444	5.21511	-7.88055	6.9655e-05	0.00235421	2.23702	Down		84
TC0400008663.hg.1	HSPA4L	heat shock protein family A (Hsp70) member 4 like	-1.92499	7.16561	-7.63682	8.61079e-05	0.00255107	2.02048	Down		84
TC0500011219.hg.1	AP3B1	adaptor related protein complex 3 subunit beta 1	-1.56737	7.1191	-7.6071	8.83962e-05	0.00257207	1.99364	Down		84
TC1300006890.hg.1	EXOSC8	exosome component 8	-1.58707	6.31028	-6.88517	0.000171583	0.00338734	1.31079	Down		84
TC0600007138.hg.1	E2F3	E2F transcription factor 3	-1.53624	5.12413	-6.85094	0.000177295	0.0034288	1.27689	Down		84
TC0900008257.hg.1	RNF20	ring finger protein 20	-1.57446	6.37871	-6.36012	0.00028758	0.00441281	0.774521	Down		84
TC0400010077.hg.1	RAB28	RAB28, member RAS oncogene family	-2.13467	4.52961	-6.31888	0.000299876	0.00451238	0.730899	Down		84
TC1400007298.hg.1	ACTR10	actin related protein 10	-2.46949	6.01803	-5.74853	0.000546384	0.00640685	0.103879	Down		84
TC0500010865.hg.1	DEPDC1B	DEP domain containing 1B	-1.6746	6.29598	-5.6142	0.000633025	0.0070158	-0.050412	Down		84
TC1200011519.hg.1	EEA1	early endosome antigen 1	-2.17954	5.19032	-5.09027	0.00114998	0.0100408	-0.677461	Down		84
TC1600007887.hg.1	RBL2	RB transcriptional corepressor like 2	-2.76111	5.39084	-11.6503	4.55442e-06	0.00174206	4.91699	Down		82
TC0800012001.hg.1	PTK2	protein tyrosine kinase 2	-1.94612	4.81281	-9.3108	2.21522e-05	0.00176109	3.38941	Down		82
TC0200014550.hg.1	ORC4	origin recognition complex subunit 4	-2.04658	6.83919	-9.18853	2.42847e-05	0.0018017	3.29819	Down		82
TC0400008620.hg.1	SPATA5	spermatogenesis associated 5	-1.75414	5.54341	-8.54712	4.00347e-05	0.00198916	2.79808	Down		82
TC0500008794.hg.1	CTNNA1	catenin alpha 1	-1.66199	7.88127	-8.37365	4.60783e-05	0.00206555	2.6563	Down		82
TC1000007888.hg.1	VPS26A	VPS26, retromer complex component A	-1.65142	8.33961	-8.24673	5.11496e-05	0.00213121	2.55071	Down		82
TC1200008002.hg.1	XPOT	exportin for tRNA	-1.76358	8.66777	-8.13459	5.61545e-05	0.00218047	2.4561	Down		82
TC1400008631.hg.1	CHD8	chromodomain helicase DNA binding protein 8	-1.74732	5.77633	-8.02076	6.18032e-05	0.00225842	2.35876	Down		82
TC0500007919.hg.1	MSH3	mutS homolog 3	-1.5711	5.90646	-7.50032	9.71965e-05	0.00267924	1.89639	Down		82
TC1100009048.hg.1	DLAT	dihydrolipoamide S-acetyltransferase	-1.93821	5.31174	-6.65405	0.000214574	0.00378781	1.07905	Down		82
TC0700012798.hg.1	KDM7A	lysine demethylase 7A	-2.04938	5.62569	-6.385	0.000280431	0.00435299	0.800739	Down		82
TC1500008840.hg.1	TJP1	tight junction protein 1	-1.73433	5.80547	-5.40274	0.000801915	0.00801214	-0.298609	Down		82
TC1600009422.hg.1	GSPT1	G1 to S phase transition 1	-2.22851	8.29509	-9.16247	2.47685e-05	0.00180714	3.27858	Down		80
TC1800008116.hg.1	AFG3L2	AFG3 like matrix AAA peptidase subunit 2	-1.8368	7.11174	-8.77105	3.35062e-05	0.00193361	2.97691	Down		80
TC1300008171.hg.1	CDC16	cell division cycle 16	-2.20565	5.54564	-8.76479	3.36716e-05	0.00193361	2.97197	Down		80
TC1100006840.hg.1	CTR9	CTR9 homolog, Paf1/RNA polymerase II complex component	-1.71922	6.74172	-8.70385	3.53306e-05	0.00193732	2.92373	Down		80
TC0200016574.hg.1	DNAJC10	DnaJ heat shock protein family (Hsp40) member C10	-3.24035	4.77168	-8.64217	3.71036e-05	0.00197512	2.87456	Down		80
TC2200007607.hg.1	NUP50	nucleoporin 50	-2.03573	6.20835	-7.99471	6.31842e-05	0.00227254	2.33629	Down		80
TC1200007277.hg.1	DNM1L	dynamin 1 like	-1.52934	5.68518	-7.69051	8.21404e-05	0.00252707	2.06873	Down		80
TC1100008979.hg.1	CUL5	cullin 5	-2.81239	6.43207	-7.62931	8.66798e-05	0.00255635	2.01371	Down	TSG	80
TC1100012353.hg.1	ZW10	zw10 kinetochore protein	-1.68143	5.14555	-7.40493	0.000105893	0.00277496	1.80844	Down		80
TC0900011519.hg.1	PPP6C	protein phosphatase 6 catalytic subunit	-1.55042	8.07015	-7.07139	0.000143884	0.00314044	1.49276	Down	TSG	80
TC0700008743.hg.1	PIK3CG	phosphatidylinositol-4,5-bisphosphate 3-kinase catalytic subunit gamma	-1.70759	6.49407	-6.98144	0.000156586	0.00326029	1.40538	Down		80
TC1200011454.hg.1	CEP290	centrosomal protein 290	-1.81902	4.74701	-6.87694	0.000172938	0.0033971	1.30265	Down		80
TC0100006806.hg.1	UBE4B	ubiquitination factor E4B	-1.59769	7.12587	-6.43703	0.000266115	0.00423713	0.855286	Down		80
TC2000007343.hg.1	DHX35	DEAH-box helicase 35	-1.6122	5.23549	-5.97703	0.000427599	0.00551319	0.360478	Down		80
TC0500013211.hg.1	APC	APC regulator of WNT signaling pathway	-2.02965	4.21794	-9.11859	2.56076e-05	0.00182842	3.24543	Down	TSG	78
TC0300012970.hg.1	KPNA4	karyopherin subunit alpha 4	-2.07759	7.00456	-8.80642	3.25886e-05	0.00192546	3.00473	Down		78
TC0400010886.hg.1	UBA6	ubiquitin like modifier activating enzyme 6	-1.79274	5.28033	-8.48852	4.19709e-05	0.00200215	2.75051	Down		78
TC0100011520.hg.1	PPP2R5A	protein phosphatase 2 regulatory subunit B'alpha	-2.43559	6.8501	-8.28796	4.94367e-05	0.00210546	2.58518	Down		78
TC1100013148.hg.1	PIK3C2A	phosphatidylinositol-4-phosphate 3-kinase catalytic subunit type 2 alpha	-1.9003	5.52649	-8.14911	5.54767e-05	0.00217437	2.46842	Down		78
TC0200007015.hg.1	RAB10	RAB10, member RAS oncogene family	-1.72854	8.75962	-7.56651	9.16321e-05	0.00260581	1.95682	Down		78
TC1400009649.hg.1	NUMB	NUMB endocytic adaptor protein	-1.57354	6.63062	-7.14741	0.000134043	0.00305552	1.56585	Down		78
TC0700009253.hg.1	NUP205	nucleoporin 205	-1.63981	5.46479	-6.87433	0.000173369	0.00339813	1.30007	Down		78
TC1700012340.hg.1	NUP88	nucleoporin 88	-1.72898	5.31966	-6.63146	0.000219383	0.00383254	1.05603	Down		78
TC0800010154.hg.1	LSM1	LSM1 homolog, mRNA degradation associated	-2.28457	5.96176	-6.04132	0.000399571	0.00530629	0.431349	Down		78
TC0100006812.hg.1	KIF1B	kinesin family member 1B	-2.41687	5.4265	-10.844	7.58798e-06	0.00174206	4.4336	Down		76
TC1400009002.hg.1	SEC23A	SEC23 homolog A, COPII coat complex component	-2.2539	5.49536	-10.6206	8.79317e-06	0.00174206	4.29219	Down		76
TC0100007789.hg.1	AGO3	argonaute RISC catalytic component 3	-2.13615	6.06374	-10.2137	1.15857e-05	0.00174206	4.0256	Down		76
TC0300009468.hg.1	PRKCI	protein kinase C iota	-1.96564	7.76303	-9.73068	1.62815e-05	0.00174206	3.69323	Down		76
TC0300014053.hg.1	PIK3CB	phosphatidylinositol-4,5-bisphosphate 3-kinase catalytic subunit beta	-2.0766	6.44502	-9.71687	1.64442e-05	0.00174206	3.68346	Down	oncogene	76
TC0200007174.hg.1	SPAST	spastin	-2.19109	5.52796	-9.39098	2.08681e-05	0.00176109	3.44855	Down		76
TC1000006796.hg.1	SEC61A2	SEC61 translocon subunit alpha 2	-1.81622	3.44561	-8.94888	2.91677e-05	0.00188708	3.11565	Down		76
TC0100012601.hg.1	LRRC47	leucine rich repeat containing 47	-1.97491	6.38084	-8.70237	3.53718e-05	0.00193732	2.92256	Down		76
TC1500007004.hg.1	RTF1	RTF1 homolog, Paf1/RNA polymerase II complex component	-2.46872	8.11065	-8.04246	6.06793e-05	0.00224471	2.37741	Down		76
TC0300012857.hg.1	DHX36	DEAH-box helicase 36	-2.06823	5.82131	-7.69752	8.16377e-05	0.00252426	2.075	Down		76
TC0100014514.hg.1	SERBP1	SERPINE1 mRNA binding protein 1	-1.61453	10.0665	-7.69125	8.20873e-05	0.00252707	2.06939	Down		76
TC0500008540.hg.1	PHAX	phosphorylated adaptor for RNA export	-1.57711	6.77667	-7.38153	0.000108157	0.00279913	1.78671	Down		76
TC2000008104.hg.1	PRPF6	pre-mRNA processing factor 6	-1.53584	5.61016	-7.14435	0.000134424	0.00305769	1.56292	Down		76
TC0100014457.hg.1	JAK1	Janus kinase 1	-2.07449	6.80339	-7.12061	0.000137425	0.00308173	1.54015	Down	oncogene, TSG	76
TC0600010962.hg.1	DEK	DEK proto-oncogene	-1.50008	10.3607	-7.04802	0.00014707	0.00316302	1.47014	Down	oncogene, fusion	76
TC2000009949.hg.1	STX16	syntaxin 16	-1.62058	6.39145	-6.96864	0.000158493	0.00327331	1.39287	Down		76
TC0900008222.hg.1	STX17	syntaxin 17	-1.54985	5.43582	-6.29124	0.000308443	0.00458724	0.701538	Down		76
TC0200007775.hg.1	MDH1	malate dehydrogenase 1	-1.51759	6.36223	-6.08581	0.000381365	0.00516885	0.480075	Down		76
TC1000010310.hg.1	CUL2	cullin 2	-2.44684	5.80319	-12.1694	3.33376e-06	0.00174206	5.20733	Down		74
TC1700008703.hg.1	NOL11	nucleolar protein 11	-2.37662	6.17552	-11.1643	6.17063e-06	0.00174206	4.6306	Down		74
TC0300012426.hg.1	PIK3R4	phosphoinositide-3-kinase regulatory subunit 4	-1.9359	4.21365	-9.59038	1.80224e-05	0.00174206	3.5933	Down		74
TC0300011383.hg.1	PSMD6	proteasome 26S subunit, non-ATPase 6	-2.03444	6.69844	-9.45633	1.98834e-05	0.00174206	3.49634	Down		74
TC0500007804.hg.1	HMGCR	3-hydroxy-3-methylglutaryl-CoA reductase	-2.04333	7.47809	-8.11323	5.7169e-05	0.00219825	2.43793	Down		74
TC0300010033.hg.1	PAK2	p21 (RAC1) activated kinase 2	-1.56746	7.25915	-7.90997	6.79194e-05	0.00232533	2.26273	Down		74
TC1100008983.hg.1	ACAT1	acetyl-CoA acetyltransferase 1	-1.72886	6.55631	-7.81064	7.39831e-05	0.00241511	2.17556	Down		74
TC0200008996.hg.1	ACTR3	actin related protein 3	-2.07845	8.42203	-7.52796	9.48281e-05	0.00265079	1.92168	Down		74
TC1600010500.hg.1	GOT2	glutamic-oxaloacetic transaminase 2	-1.84502	7.52377	-7.52495	9.50827e-05	0.00265455	1.91894	Down		74
TC0600013727.hg.1	EZR	ezrin	-1.62304	8.15268	-7.40295	0.000106082	0.00277591	1.80661	Down		74
TC0600013251.hg.1	HBS1L	HBS1 like translational GTPase	-1.66673	8.42228	-7.25258	0.000121644	0.00294196	1.66585	Down		74
TC0100009418.hg.1	RAP1A	RAP1A, member of RAS oncogene family	-2.08092	6.96946	-7.24683	0.000122288	0.00295096	1.66041	Down		74
TC1600009482.hg.1	PARN	poly(A)-specific ribonuclease	-1.85231	6.66367	-6.72824	0.000199588	0.00364055	1.15416	Down		74
TC1100010990.hg.1	MRPL16	mitochondrial ribosomal protein L16	-1.66496	6.35229	-6.65838	0.000213666	0.00377519	1.08345	Down		74
TC0200011745.hg.1	ROCK2	Rho associated coiled-coil containing protein kinase 2	-2.45667	5.46334	-6.63719	0.000218152	0.00382026	1.06188	Down		74
TC1500009508.hg.1	NEDD4	NEDD4 E3 ubiquitin protein ligase	-1.77425	4.21252	-5.81028	0.000511028	0.00616916	0.173953	Down		74
TC0900009844.hg.1	SMU1	SMU1 DNA replication regulator and spliceosomal factor	-2.12983	6.19231	-5.39213	0.000811615	0.00807337	-0.311235	Down		74
TC1600011557.hg.1	TERF2	telomeric repeat binding factor 2	-2.29553	6.17441	-11.3163	5.60452e-06	0.00174206	4.72173	Down		72
TC1100013088.hg.1	BIRC2	baculoviral IAP repeat containing 2	-2.74971	5.23208	-11.1467	6.24028e-06	0.00174206	4.61994	Down		72
TC0900008202.hg.1	TGFBR1	transforming growth factor beta receptor 1	-2.27179	6.26374	-10.144	1.21587e-05	0.00174206	3.97867	Down		72
TC0500007966.hg.1	XRCC4	X-ray repair cross complementing 4	-2.20236	6.07247	-9.91128	1.43124e-05	0.00174206	3.81958	Down		72
TC1100007050.hg.1	PRMT3	protein arginine methyltransferase 3	-2.44935	5.4097	-9.67418	1.69588e-05	0.00174206	3.65317	Down		72
TC0200012252.hg.1	STRN	striatin	-2.14802	6.96066	-9.44222	2.00915e-05	0.00174206	3.48605	Down		72
TC1300008533.hg.1	HSPH1	heat shock protein family H (Hsp110) member 1	-1.84283	6.64849	-9.2661	2.29065e-05	0.00178211	3.3562	Down		72
TC1300006930.hg.1	COG6	component of oligomeric golgi complex 6	-1.69862	4.20247	-8.38607	4.56132e-05	0.00206107	2.66655	Down		72
TC0100010793.hg.1	CEP350	centrosomal protein 350	-1.87593	5.24267	-8.22262	5.21818e-05	0.00213526	2.53048	Down		72
TC1500010707.hg.1	ARHGAP11B	Rho GTPase activating protein 11B	-2.12941	4.83501	-8.16548	5.47233e-05	0.00216313	2.48228	Down		72
TC1300008873.hg.1	SUCLA2	succinate-CoA ligase ADP-forming subunit beta	-1.70019	6.55319	-7.81521	7.36912e-05	0.00241328	2.17959	Down		72
TC1000010115.hg.1	YME1L1	YME1 like 1 ATPase	-1.6029	8.00497	-7.64776	8.52828e-05	0.00254517	2.03033	Down		72
TC0700012203.hg.1	COG5	component of oligomeric golgi complex 5	-1.52249	8.13732	-7.57867	9.06492e-05	0.0025963	1.96786	Down		72
TC0600012551.hg.1	MDN1	midasin AAA ATPase 1	-1.95013	4.4697	-6.81689	0.000183191	0.0034865	1.24301	Down		72
TC0X00010356.hg.1	BTK	Bruton tyrosine kinase	-1.5045	6.38007	-6.44161	0.000264895	0.00422625	0.86007	Down	oncogene, TSG	72
TC1900009824.hg.1	DNAJB1	DnaJ heat shock protein family (Hsp40) member B1	-1.61423	6.92096	-5.36329	0.000838643	0.00821504	-0.345641	Down		72
TC0100016366.hg.1	KIFAP3	kinesin associated protein 3	-2.47834	5.87378	-10.7312	8.17159e-06	0.00174206	4.36261	Down		70
TC1400008397.hg.1	MARK3	microtubule affinity regulating kinase 3	-2.0886	5.43589	-10.0677	1.28212e-05	0.00174206	3.927	Down		70
TC0700011876.hg.1	ASNS	asparagine synthetase (glutamine-hydrolyzing)	-1.90793	9.29059	-9.60349	1.78511e-05	0.00174206	3.60271	Down		70
TC0400007580.hg.1	CEP135	centrosomal protein 135	-2.05266	5.47493	-9.39636	2.0785e-05	0.00176109	3.45249	Down		70
TC0800008786.hg.1	NSMCE2	NSE2 (MMS21) homolog, SMC5-SMC6 complex SUMO ligase	-2.0801	6.63676	-8.78244	3.32074e-05	0.00192727	2.98588	Down		70
TC0300012189.hg.1	KPNA1	karyopherin subunit alpha 1	-1.74767	5.83308	-8.01307	6.22074e-05	0.00226556	2.35213	Down		70
TC0100010661.hg.1	DARS2	aspartyl-tRNA synthetase 2, mitochondrial	-2.04888	5.52348	-7.77082	7.65816e-05	0.00244813	2.14032	Down		70
TC0500007591.hg.1	CWC27	CWC27 spliceosome associated cyclophilin	-1.67734	7.21893	-7.72641	7.96018e-05	0.00249591	2.10082	Down		70
TC0200011086.hg.1	DIS3L2	DIS3 like 3'-5' exoribonuclease 2	-1.72974	4.3084	-7.71559	8.03573e-05	0.00250249	2.09116	Down		70
TC0100016447.hg.1	RC3H1	ring finger and CCCH-type domains 1	-1.56789	5.66177	-7.64152	8.57526e-05	0.00255049	2.02471	Down		70
TC0500007452.hg.1	MAP3K1	mitogen-activated protein kinase kinase kinase 1	-2.12794	5.16513	-7.50652	9.66593e-05	0.00267102	1.90207	Down	oncogene, TSG	70
TC0100008336.hg.1	SCP2	sterol carrier protein 2	-1.98936	8.36806	-6.90169	0.0001689	0.00336651	1.3271	Down		70
TC1000008045.hg.1	SEC24C	SEC24 homolog C, COPII coat complex component	-1.67904	7.3436	-6.73062	0.000199128	0.00363521	1.15656	Down		70
TC1000011885.hg.1	DCLRE1A	DNA cross-link repair 1A	-1.76679	5.13294	-6.61092	0.000223861	0.00387572	1.03505	Down		70
TC0300011047.hg.1	IMPDH2	inosine monophosphate dehydrogenase 2	-1.5847	7.82902	-6.6107	0.000223908	0.00387572	1.03483	Down		70
TC1000009387.hg.1	PPP2R2D	protein phosphatase 2 regulatory subunit Bdelta	-1.58586	5.56101	-6.56414	0.000234441	0.0039663	0.987078	Down		70
TC0500010549.hg.1	RICTOR	RPTOR independent companion of MTOR complex 2	-1.52758	5.81483	-6.49816	0.000250324	0.00409305	0.91893	Down		70
TC1600009620.hg.1	SMG1	SMG1 nonsense mediated mRNA decay associated PI3K related kinase	-1.50857	5.42711	-6.4646	0.000258861	0.00417292	0.884047	Down		70
TC0700012761.hg.1	ZC3HAV1	zinc finger CCCH-type containing, antiviral 1	-1.50173	6.81393	-5.51636	0.00070571	0.00746135	-0.164445	Down		70
TC0900006937.hg.1	ACO1	aconitase 1	-1.99074	5.82672	-5.21656	0.00099246	0.0091611	-0.522588	Down		70
TC1000011025.hg.1	PPP3CB	protein phosphatase 3 catalytic subunit beta	-1.73508	4.69734	-5.0809	0.00116272	0.0100967	-0.689048	Down		70
TC0600013193.hg.1	STX7	syntaxin 7	-1.80401	5.8498	-4.7126	0.00181073	0.0134555	-1.15503	Down		70
TC1000009802.hg.1	UPF2	UPF2 regulator of nonsense mediated mRNA decay	-2.03995	5.36645	-9.80845	1.53985e-05	0.00174206	3.74795	Down		68
TC1200012643.hg.1	ERBB3	erb-b2 receptor tyrosine kinase 3	-2.02262	5.02753	-9.56762	1.83241e-05	0.00174206	3.57694	Down	oncogene	68
TC1000008452.hg.1	BTAF1	B-TFIID TATA-box binding protein associated factor 1	-2.43864	5.57076	-8.88339	3.06874e-05	0.00191291	3.06489	Down		68
TC0300007083.hg.1	WDR48	WD repeat domain 48	-1.87124	5.61727	-8.33926	4.73943e-05	0.00209094	2.62785	Down		68
TC1500010140.hg.1	WDR61	WD repeat domain 61	-1.91023	3.29878	-7.47839	9.91229e-05	0.00269563	1.87626	Down		68
TC1100009210.hg.1	ARCN1	archain 1	-1.50851	8.47297	-7.46348	0.000100457	0.00271377	1.86255	Down		68
TC0100010369.hg.1	ATF6	activating transcription factor 6	-1.94374	7.37168	-6.67294	0.000210643	0.00373853	1.09823	Down		68
TC0100009902.hg.1	PRPF3	pre-mRNA processing factor 3	-1.67938	6.56489	-6.16742	0.000350322	0.00493773	0.568735	Down		68
TC2000006833.hg.1	SEC23B	SEC23 homolog B, COPII coat complex component	-2.00988	6.92634	-6.134	0.000362682	0.0050464	0.532535	Down		68
TC0200013607.hg.1	TXNDC9	thioredoxin domain containing 9	-1.79498	4.46386	-5.48185	0.000733504	0.00765086	-0.204987	Down		68
TC0500011433.hg.1	CETN3	centrin 3	-1.6735	5.13069	-5.45538	0.000755649	0.00777536	-0.236212	Down		68
TC0600012671.hg.1	ASCC3	activating signal cointegrator 1 complex subunit 3	-1.72123	4.84589	-5.38285	0.000820202	0.00812343	-0.322289	Down		68
TC0400007096.hg.1	ANAPC4	anaphase promoting complex subunit 4	-1.5504	5.15625	-5.19563	0.00101683	0.00929319	-0.548088	Down		68
TC0200016682.hg.1	PPP3R1	protein phosphatase 3 regulatory subunit B, alpha	-2.8017	6.00419	-11.1138	6.37293e-06	0.00174206	4.59997	Down		66
TC2100006618.hg.1	USP25	ubiquitin specific peptidase 25	-2.13278	6.66743	-10.7858	7.88272e-06	0.00174206	4.39711	Down		66
TC0300012596.hg.1	COPB2	COPI coat complex subunit beta 2	-2.19683	7.60676	-10.3831	1.03173e-05	0.00174206	4.13799	Down		66
TC0500013219.hg.1	HSD17B4	hydroxysteroid 17-beta dehydrogenase 4	-2.03066	6.80643	-9.56798	1.83192e-05	0.00174206	3.57721	Down		66
TC0800011312.hg.1	RRM2B	ribonucleotide reductase regulatory TP53 inducible subunit M2B	-2.58622	5.33765	-9.32511	2.19166e-05	0.00176109	3.4	Down		66
TC1200007425.hg.1	ARID2	AT-rich interaction domain 2	-2.28659	5.01141	-9.13836	2.52257e-05	0.00181608	3.26038	Down	TSG	66
TC0200012804.hg.1	VPS54	VPS54 subunit of GARP complex	-2.11011	3.86681	-8.60643	3.81763e-05	0.0019789	2.8459	Down		66
TC1800009289.hg.1	ACAA2	acetyl-CoA acyltransferase 2	-1.73323	6.3489	-8.43869	4.37e-05	0.00203801	2.7098	Down		66
TC1600007112.hg.1	CCP110	centriolar coiled-coil protein 110	-2.0524	4.7176	-8.40567	4.48899e-05	0.00205349	2.68269	Down		66
TC0200007184.hg.1	BIRC6	baculoviral IAP repeat containing 6	-1.74755	5.17269	-8.15259	5.53157e-05	0.00217437	2.47137	Down	oncogene, fusion	66
TC1000012399.hg.1	ECHS1	enoyl-CoA hydratase, short chain 1	-1.54885	7.17373	-7.71919	8.01055e-05	0.00249783	2.09437	Down		66
TC1000012564.hg.1	DNAJC9	DnaJ heat shock protein family (Hsp40) member C9	-1.91301	6.63635	-7.62013	8.73848e-05	0.00256321	2.00542	Down		66
TC0100009331.hg.1	STXBP3	syntaxin binding protein 3	-1.60111	6.05129	-7.60464	8.85884e-05	0.00257207	1.99141	Down		66
TC1600009200.hg.1	TRAP1	TNF receptor associated protein 1	-1.7095	8.32006	-7.35765	0.000110523	0.00282237	1.76447	Down		66
TC0400007399.hg.1	GUF1	GTP binding elongation factor GUF1	-1.61106	6.05036	-7.21883	0.000125478	0.00297014	1.6339	Down		66
TC0800007766.hg.1	RAB2A	RAB2A, member RAS oncogene family	-1.52284	7.5211	-6.97749	0.000157171	0.00326605	1.40152	Down		66
TC0300013703.hg.1	RNF168	ring finger protein 168	-1.56141	6.70932	-6.86469	0.000174976	0.00340503	1.29052	Down		66
TC0100009040.hg.1	RPAP2	RNA polymerase II associated protein 2	-1.76929	4.30708	-6.78711	0.000188526	0.00353689	1.21327	Down		66
TC0600014193.hg.1	SCAF8	SR-related CTD associated factor 8	-1.59861	6.87282	-6.75067	0.000195291	0.00360605	1.17673	Down		66
TC0700007285.hg.1	CDK13	cyclin dependent kinase 13	-1.59925	6.48284	-6.50457	0.000248729	0.00407619	0.925577	Down		66
TC0500011759.hg.1	ATG12	autophagy related 12	-1.56478	6.32658	-6.44361	0.000264362	0.00422085	0.862164	Down		66
TC1000007889.hg.1	SUPV3L1	Suv3 like RNA helicase	-1.5887	6.45009	-5.99996	0.000417358	0.00544321	0.385824	Down		66
TC0100016893.hg.1	DDX59	DEAD-box helicase 59	-2.12382	5.6179	-5.6883	0.000583493	0.00666045	0.0350168	Down		66
TC0900009770.hg.1	PLAA	phospholipase A2 activating protein	-2.3355	5.55713	-11.2003	6.0311e-06	0.00174206	4.65229	Down		64
TC0800010427.hg.1	RB1CC1	RB1 inducible coiled-coil 1	-2.58667	5.37605	-9.92713	1.41527e-05	0.00174206	3.83055	Down		64
TC1300009992.hg.1	BIVM-ERCC5	BIVM-ERCC5 readthrough	-2.19832	3.77689	-9.4971	1.92954e-05	0.00174206	3.52599	Down		64
TC1800007849.hg.1	THOC1	THO complex 1	-2.31342	4.3222	-9.44377	2.00685e-05	0.00174206	3.48719	Down		64
TC0700010472.hg.1	TRA2A	transformer 2 alpha homolog	-2.20663	6.94474	-9.01977	2.76172e-05	0.00187929	3.17017	Down		64
TC0600006793.hg.1	CDYL	chromodomain Y like	-2.16119	6.44146	-8.00474	6.26486e-05	0.0022721	2.34495	Down		64
TC1800009277.hg.1	PIAS2	protein inhibitor of activated STAT 2	-1.63192	6.12617	-7.86578	7.05452e-05	0.00237335	2.22408	Down		64
TC0900012181.hg.1	NUP188	nucleoporin 188	-1.59698	5.75634	-7.73298	7.9147e-05	0.00248918	2.10667	Down		64
TC0300012029.hg.1	NAA50	N-alpha-acetyltransferase 50, NatE catalytic subunit	-2.37432	7.26869	-7.65825	8.44994e-05	0.00253335	2.03977	Down		64
TC0100013303.hg.1	HMGCL	3-hydroxy-3-methylglutaryl-CoA lyase	-1.91827	5.03639	-7.17071	0.000131179	0.00303294	1.58812	Down		64
TC0400010884.hg.1	CENPC	centromere protein C	-1.60908	6.70062	-7.12207	0.000137237	0.00308053	1.54156	Down		64
TC1100006441.hg.1	PSMD13	proteasome 26S subunit, non-ATPase 13	-1.68611	8.26577	-6.84173	0.000178869	0.00344655	1.26774	Down		64
TC0900006564.hg.1	RIC1	RIC1 homolog, RAB6A GEF complex partner 1	-1.90352	5.40332	-6.78157	0.000189537	0.00354882	1.20773	Down		64
TC1200011909.hg.1	VPS29	VPS29 retromer complex component	-1.93047	7.81247	-6.25689	0.000319477	0.00467826	0.664893	Down		64
TC1400008395.hg.1	EIF5	eukaryotic translation initiation factor 5	-1.65124	7.7703	-5.58752	0.00065199	0.00714932	-0.081373	Down		64
TC1000008908.hg.1	SHOC2	SHOC2 leucine rich repeat scaffold protein	-1.85609	6.52441	-5.1762	0.00104004	0.00942597	-0.571817	Down		64
TC0900010878.hg.1	FANCC	FA complementation group C	-1.66014	5.61198	-4.83914	0.00155169	0.0121373	-0.992605	Down	TSG	64
TC0300012170.hg.1	GOLGB1	golgin B1	-1.9663	3.94285	-9.99578	1.34842e-05	0.00174206	3.87783	Down		62
TC0600013272.hg.1	BCLAF1	BCL2 associated transcription factor 1	-2.03495	6.61381	-9.95834	1.38443e-05	0.00174206	3.85209	Down		62
TC1900007795.hg.1	LSM14A	LSM14A mRNA processing body assembly factor	-2.03493	6.63085	-9.90092	1.44179e-05	0.00174206	3.81239	Down		62
TC2000008666.hg.1	NAPB	NSF attachment protein beta	-2.49288	4.1941	-9.76853	1.58448e-05	0.00174206	3.71992	Down		62
TC0600012658.hg.1	CCNC	cyclin C	-2.19721	7.26645	-9.67194	1.69863e-05	0.00174206	3.65158	Down	TSG	62
TC0100018568.hg.1	ARID4B	AT-rich interaction domain 4B	-2.64781	4.70689	-9.61391	1.77164e-05	0.00174206	3.61017	Down		62
TC1200008574.hg.1	APAF1	apoptotic peptidase activating factor 1	-2.1619	5.40365	-9.33409	2.17703e-05	0.00176109	3.40664	Down		62
TC1300007755.hg.1	DNAJC3	DnaJ heat shock protein family (Hsp40) member C3	-2.31387	6.28189	-9.01486	2.77216e-05	0.0018833	3.1664	Down		62
TC0300013330.hg.1	DCUN1D1	defective in cullin neddylation 1 domain containing 1	-1.78685	4.86067	-8.18812	5.37003e-05	0.00214962	2.50142	Down		62
TC1600010179.hg.1	DNAJA2	DnaJ heat shock protein family (Hsp40) member A2	-1.75671	6.68055	-8.08743	5.84217e-05	0.0022189	2.41593	Down		62
TC0X00008533.hg.1	HTATSF1	HIV-1 Tat specific factor 1	-1.71542	6.33378	-7.65249	8.49282e-05	0.00253919	2.0346	Down		62
TC0300012252.hg.1	SNX4	sorting nexin 4	-1.61508	5.96014	-7.62604	8.69305e-05	0.00255719	2.01075	Down		62
TC1200012657.hg.1	CAND1	cullin associated and neddylation dissociated 1	-2.00409	5.8898	-7.57662	9.08135e-05	0.0025963	1.96601	Down		62
TC1400007036.hg.1	PRPF39	pre-mRNA processing factor 39	-1.88848	4.18298	-6.16585	0.000350894	0.00494096	0.567032	Down		62
TC0200013894.hg.1	ANAPC1	anaphase promoting complex subunit 1	-1.61297	5.72142	-6.12244	0.00036707	0.00507427	0.519978	Down		62
TC0200012925.hg.1	C1D	C1D nuclear receptor corepressor	-1.67822	6.76044	-6.12214	0.000367184	0.00507427	0.519655	Down		62
TC1800008219.hg.1	ROCK1	Rho associated coiled-coil containing protein kinase 1	-1.9744	4.81253	-5.77213	0.000532561	0.00629446	0.130725	Down		62
TC1700010717.hg.1	STAT5B	signal transducer and activator of transcription 5B	-1.67084	6.7936	-4.6912	0.00185906	0.0136942	-1.18275	Down	oncogene, TSG, fusion	62
TC0500007725.hg.1	BDP1	B double prime 1, subunit of RNA polymerase III transcription initiation factor IIIB	-2.38703	5.28224	-11.6617	4.52255e-06	0.00174206	4.92357	Down		60
TC0800006983.hg.1	PPP3CC	protein phosphatase 3 catalytic subunit gamma	-2.11308	5.81719	-10.065	1.2846e-05	0.00174206	3.92512	Down		60
TC0400006987.hg.1	LAP3	leucine aminopeptidase 3	-2.28111	7.58976	-9.85731	1.48712e-05	0.00174206	3.78209	Down		60
TC0600008050.hg.1	UBR2	ubiquitin protein ligase E3 component n-recognin 2	-2.0598	6.46579	-9.82864	1.51782e-05	0.00174206	3.76207	Down		60
TC0200008803.hg.1	GCC2	GRIP and coiled-coil domain containing 2	-2.18263	4.64518	-9.75881	1.59557e-05	0.00174206	3.71308	Down		60
TC0600006864.hg.1	RIOK1	RIO kinase 1	-2.19447	6.87086	-9.1657	2.4708e-05	0.00180714	3.28101	Down		60
TC0100016963.hg.1	KDM5B	lysine demethylase 5B	-1.89549	7.60936	-8.87067	3.0993e-05	0.00191291	3.05498	Down		60
TC1400010780.hg.1	ATXN3	ataxin 3	-2.08034	5.09329	-8.54642	4.00571e-05	0.00198916	2.79752	Down		60
TC0200012030.hg.1	HADHA	hydroxyacyl-CoA dehydrogenase trifunctional multienzyme complex subunit alpha	-1.84611	8.95773	-8.31693	4.82715e-05	0.00209634	2.60931	Down		60
TC1500010041.hg.1	EDC3	enhancer of mRNA decapping 3	-1.88191	6.67659	-8.20261	5.30564e-05	0.0021406	2.51364	Down		60
TC1800007066.hg.1	MAPRE2	microtubule associated protein RP/EB family member 2	-1.65056	8.26198	-7.74675	7.82025e-05	0.00247986	2.11893	Down		60
TC1600007874.hg.1	CHD9	chromodomain helicase DNA binding protein 9	-1.52925	6.21858	-7.67693	8.31244e-05	0.00252707	2.05655	Down		60
TC0600010066.hg.1	IGF2R	insulin like growth factor 2 receptor	-1.66702	5.07662	-7.58347	9.0264e-05	0.00259506	1.97223	Down		60
TC1700007599.hg.1	AP2B1	adaptor related protein complex 2 subunit beta 1	-1.58717	7.93697	-7.56945	9.13933e-05	0.002603	1.95949	Down		60
TC1200010250.hg.1	ERGIC2	ERGIC and golgi 2	-1.76577	5.93764	-7.13346	0.000135792	0.0030719	1.55248	Down		60
TC1700008418.hg.1	DYNLL2	dynein light chain LC8-type 2	-1.56914	6.09782	-6.82396	0.000181949	0.00347351	1.25006	Down		60
TC1700008573.hg.1	DDX42	DEAD-box helicase 42	-2.08335	6.63794	-6.23948	0.000325233	0.00472743	0.64627	Down		60
TC2200009275.hg.1	ADSL	adenylosuccinate lyase	-1.87473	6.69734	-6.05515	0.000393808	0.00525546	0.446531	Down		60
TC0100011940.hg.1	COG2	component of oligomeric golgi complex 2	-1.57382	4.72628	-5.7991	0.000517236	0.00619461	0.161309	Down		60
TC0200015225.hg.1	HIBCH	3-hydroxyisobutyryl-CoA hydrolase	-1.74653	4.9038	-5.56132	0.000671221	0.00723592	-0.111869	Down		60
TC0100014660.hg.1	FUBP1	far upstream element binding protein 1	-1.53034	7.25283	-4.68509	0.0018731	0.0137658	-1.19066	Down	oncogene	60
TC2000007300.hg.1	RPRD1B	regulation of nuclear pre-mRNA domain containing 1B	-2.5003	6.72408	-11.4305	5.21751e-06	0.00174206	4.78926	Down		58
TC1700009694.hg.1	MYH10	myosin heavy chain 10	-2.59324	7.65991	-10.0779	1.27309e-05	0.00174206	3.93389	Down		58
TC2000009447.hg.1	DPM1	dolichyl-phosphate mannosyltransferase subunit 1, catalytic	-2.03813	6.29778	-9.89351	1.44937e-05	0.00174206	3.80726	Down		58
TC1300007344.hg.1	TDRD3	tudor domain containing 3	-2.0282	5.33761	-8.95941	2.89314e-05	0.00188708	3.12377	Down		58
TC0700013383.hg.1	RABGEF1	RAB guanine nucleotide exchange factor 1	-2.15445	6.19014	-8.73099	3.45805e-05	0.00193699	2.94526	Down		58
TC1700010571.hg.1	MED1	mediator complex subunit 1	-1.77666	5.62022	-8.58282	3.89043e-05	0.00198229	2.82691	Down		58
TC0200008351.hg.1	RPIA	ribose 5-phosphate isomerase A	-1.84796	5.15963	-8.19448	5.34166e-05	0.00214914	2.50678	Down		58
TC0100010553.hg.1	C1orf112	chromosome 1 open reading frame 112	-1.63044	4.33573	-8.09211	5.81924e-05	0.00221407	2.41992	Down		58
TC1000011323.hg.1	GLUD1	glutamate dehydrogenase 1	-2.05027	7.56762	-7.96273	6.49263e-05	0.0022804	2.30862	Down		58
TC0200012307.hg.1	SOS1	SOS Ras/Rac guanine nucleotide exchange factor 1	-1.60841	5.70623	-7.8749	6.99938e-05	0.00236011	2.23208	Down		58
TC2000009986.hg.1	SNX5	sorting nexin 5	-1.60797	8.20216	-7.41964	0.000104497	0.00276779	1.82207	Down		58
TC0300008782.hg.1	IFT122	intraflagellar transport 122	-2.08102	5.53314	-7.18726	0.000129186	0.00301517	1.60389	Down		58
TC0300013736.hg.1	DLG1	discs large MAGUK scaffold protein 1	-2.04276	5.89354	-7.12345	0.000137062	0.00307893	1.54288	Down		58
TC0500009009.hg.1	TCERG1	transcription elongation regulator 1	-1.57041	7.20676	-6.855	0.000176607	0.00342729	1.28092	Down		58
TC0900011378.hg.1	CDK5RAP2	CDK5 regulatory subunit associated protein 2	-1.98651	5.58331	-6.8255	0.000181679	0.00347067	1.2516	Down		58
TC1700007399.hg.1	ERAL1	Era like 12S mitochondrial rRNA chaperone 1	-1.71469	6.66029	-6.75025	0.00019537	0.00360605	1.17631	Down		58
TC1600010407.hg.1	NUDT21	nudix hydrolase 21	-1.85089	7.67861	-6.50542	0.000248519	0.00407429	0.926455	Down		58
TC1600008141.hg.1	CBFB	core-binding factor subunit beta	-1.6745	8.8642	-6.43163	0.000267564	0.00423922	0.849638	Down	TSG, fusion	58
TC0X00008866.hg.1	VBP1	VHL binding protein 1	-1.99962	7.76656	-6.3795	0.000281995	0.00436628	0.794947	Down		58
TC0300009202.hg.1	MBNL1	muscleblind like splicing regulator 1	-1.58906	9.3069	-6.34525	0.000291948	0.00444547	0.758816	Down		58
TC1700008463.hg.1	DHX40	DEAH-box helicase 40	-1.53885	5.9505	-6.26372	0.000317247	0.0046675	0.672199	Down		58
TC1100012140.hg.1	DCUN1D5	defective in cullin neddylation 1 domain containing 5	-2.1994	7.49976	-6.21869	0.00033226	0.00478252	0.623972	Down		58
TC0200010713.hg.1	ATIC	5-aminoimidazole-4-carboxamide ribonucleotide formyltransferase/IMP cyclohydrolase	-1.79317	7.74745	-6.1953	0.000340368	0.00485936	0.598819	Down		58
TC0800008726.hg.1	TBC1D31	TBC1 domain family member 31	-1.57331	6.68357	-6.00124	0.000416796	0.00544015	0.387234	Down		58
TC0300011452.hg.1	UBA3	ubiquitin like modifier activating enzyme 3	-1.64249	6.60957	-5.65732	0.00060366	0.00679795	-0.000604177	Down		58
TC1700007700.hg.1	MRPL45	mitochondrial ribosomal protein L45	-1.6102	6.64459	-5.37485	0.000827692	0.00815962	-0.331835	Down		58
TC0600008531.hg.1	MTO1	mitochondrial tRNA translation optimization 1	-1.83945	6.12253	-4.91283	0.00141978	0.011497	-0.899138	Down		58
TC0600010008.hg.1	GTF2H5	general transcription factor IIH subunit 5	-1.73278	6.27507	-4.81156	0.00160446	0.0124004	-1.02779	Down		58
TC0X00011325.hg.1	MCTS1	MCTS1 re-initiation and release factor	-2.13005	5.47902	-4.76947	0.00168886	0.0128198	-1.08172	Down		58
TC1200012862.hg.1	VPS33A	VPS33A core subunit of CORVET and HOPS complexes	-2.43322	5.12066	-10.2521	1.1284e-05	0.00174206	4.05122	Down		56
TC0800010749.hg.1	NCOA2	nuclear receptor coactivator 2	-2.09366	5.92456	-10.0782	1.27275e-05	0.00174206	3.93415	Down	oncogene, fusion	56
TC1700011448.hg.1	POLG2	DNA polymerase gamma 2, accessory subunit	-2.02598	3.73828	-9.93846	1.40399e-05	0.00174206	3.83837	Down		56
TC0700012479.hg.1	POT1	protection of telomeres 1	-2.37399	6.39784	-9.85125	1.49355e-05	0.00174206	3.77786	Down	TSG	56
TC0500013217.hg.1	COMMD10	COMM domain containing 10	-2.0679	4.94844	-9.46835	1.9708e-05	0.00174206	3.50509	Down		56
TC0700011813.hg.1	BET1	Bet1 golgi vesicular membrane trafficking protein	-2.81171	6.21735	-9.40594	2.06381e-05	0.00176109	3.45951	Down		56
TC0100014152.hg.1	FAF1	Fas associated factor 1	-2.70604	8.91766	-9.22645	2.35996e-05	0.00179423	3.32661	Down		56
TC0900011385.hg.1	PSMD5	proteasome 26S subunit, non-ATPase 5	-1.78292	6.60499	-8.79734	3.28213e-05	0.00192546	2.9976	Down		56
TC2000008860.hg.1	COMMD7	COMM domain containing 7	-1.82571	7.20984	-8.28043	4.97447e-05	0.00211003	2.5789	Down		56
TC1500007975.hg.1	IREB2	iron responsive element binding protein 2	-1.74147	6.22217	-8.09414	5.80927e-05	0.00221261	2.42166	Down		56
TC1500007121.hg.1	SPATA5L1	spermatogenesis associated 5 like 1	-1.78603	5.07514	-7.96112	6.50154e-05	0.00228169	2.30722	Down		56
TC1000011993.hg.1	PRDX3	peroxiredoxin 3	-1.62667	7.62718	-7.89797	6.86211e-05	0.00234451	2.25226	Down		56
TC0100007570.hg.1	YTHDF2	YTH N6-methyladenosine RNA binding protein 2	-1.57306	7.21735	-7.80215	7.45283e-05	0.00241865	2.16806	Down		56
TC0700010581.hg.1	HIBADH	3-hydroxyisobutyrate dehydrogenase	-1.82359	7.42402	-7.65483	8.47537e-05	0.00253678	2.0367	Down		56
TC2000009016.hg.1	DSN1	DSN1 component of MIS12 kinetochore complex	-1.86029	6.323	-7.62288	8.71733e-05	0.00256046	2.0079	Down		56
TC0100010518.hg.1	DCAF6	DDB1 and CUL4 associated factor 6	-2.31795	6.48096	-7.13858	0.000135146	0.0030637	1.55739	Down		56
TC0100014428.hg.1	ITGB3BP	integrin subunit beta 3 binding protein	-1.76454	7.62405	-6.97491	0.000157556	0.00326848	1.399	Down		56
TC0800010258.hg.1	KAT6A	lysine acetyltransferase 6A	-2.14792	4.66999	-6.94291	0.000162406	0.00331313	1.36765	Down	oncogene, fusion	56
TC0100007784.hg.1	AGO4	argonaute RISC component 4	-1.90456	4.03774	-6.54297	0.000239412	0.00400978	0.965269	Down		56
TC0400012621.hg.1	ACSL1	acyl-CoA synthetase long chain family member 1	-1.67207	5.33717	-6.42102	0.000270432	0.0042567	0.83854	Down		56
TC0200006977.hg.1	CENPO	centromere protein O	-1.62629	5.78459	-6.32126	0.00029915	0.00450443	0.733425	Down		56
TC0500010635.hg.1	HMGCS1	3-hydroxy-3-methylglutaryl-CoA synthase 1	-1.86815	6.82432	-6.12895	0.000364591	0.00505849	0.527056	Down		56
TC1800008405.hg.1	TRAPPC8	trafficking protein particle complex subunit 8	-3.26022	5.22103	-5.87183	0.000478297	0.00591314	0.243255	Down		56
TC0500009629.hg.1	TMED9	transmembrane p24 trafficking protein 9	-1.56042	7.71152	-5.58537	0.000653547	0.00716023	-0.0838752	Down		56
TC1400007906.hg.1	ZC3H14	zinc finger CCCH-type containing 14	-1.71213	6.42341	-5.3817	0.000821282	0.00812343	-0.32367	Down		56
TC0200011023.hg.1	SP100	SP100 nuclear antigen	-1.50567	3.57719	-5.18189	0.00103319	0.00938896	-0.564867	Down		56
TC0600012432.hg.1	PGM3	phosphoglucomutase 3	-2.7126	5.44535	-13.3731	1.69075e-06	0.00174206	5.82434	Down		54
TC1200009250.hg.1	GTF2H3	general transcription factor IIH subunit 3	-2.68943	5.37775	-12.1594	3.35349e-06	0.00174206	5.20187	Down		54
TC0700011050.hg.1	FIGNL1	fidgetin like 1	-1.83655	4.77357	-9.2006	2.40643e-05	0.00180035	3.30725	Down		54
TC0300013270.hg.1	MRPL47	mitochondrial ribosomal protein L47	-1.93596	6.55716	-8.67884	3.60377e-05	0.00195314	2.90384	Down		54
TC0700008745.hg.1	PRKAR2B	protein kinase cAMP-dependent type II regulatory subunit beta	-1.97957	8.68719	-8.64028	3.71593e-05	0.00197512	2.87305	Down		54
TC1700008216.hg.1	KAT7	lysine acetyltransferase 7	-2.14147	6.61654	-8.62606	3.7583e-05	0.00197512	2.86165	Down	oncogene	54
TC0600013464.hg.1	SHPRH	SNF2 histone linker PHD RING helicase	-1.71406	5.52401	-8.61721	3.78491e-05	0.00197512	2.85456	Down		54
TC0200016543.hg.1	RIF1	replication timing regulatory factor 1	-2.16043	6.38579	-8.42089	4.43369e-05	0.00204066	2.6952	Down		54
TC0700011493.hg.1	BAZ1B	bromodomain adjacent to zinc finger domain 1B	-1.85864	7.51096	-8.08589	5.84973e-05	0.00221983	2.41461	Down		54
TC0600013271.hg.1	MTFR2	mitochondrial fission regulator 2	-2.3659	4.07513	-8.04554	6.05218e-05	0.00224471	2.38005	Down		54
TC1200008517.hg.1	METAP2	methionyl aminopeptidase 2	-1.56107	6.36057	-7.81412	7.37607e-05	0.00241328	2.17863	Down		54
TC0X00010130.hg.1	MAGT1	magnesium transporter 1	-1.90763	7.4971	-7.71376	8.04858e-05	0.0025047	2.08953	Down		54
TC0800012288.hg.1	DCTN6	dynactin subunit 6	-1.51046	6.19142	-7.54457	9.34357e-05	0.00263452	1.93685	Down		54
TC1000011690.hg.1	ARL3	ADP ribosylation factor like GTPase 3	-1.55875	5.84839	-7.36123	0.000110164	0.00281984	1.76781	Down		54
TC0200013104.hg.1	MOGS	mannosyl-oligosaccharide glucosidase	-1.76317	5.52383	-7.34488	0.000111812	0.00283373	1.75255	Down		54
TC0500012425.hg.1	CSNK1A1	casein kinase 1 alpha 1	-2.30589	8.09133	-7.22636	0.00012461	0.00296376	1.64104	Down		54
TC0800009529.hg.1	PPP1R3B	protein phosphatase 1 regulatory subunit 3B	-1.57778	5.29303	-7.15162	0.00013352	0.00305552	1.56988	Down		54
TC0500010197.hg.1	ZNF622	zinc finger protein 622	-1.97671	5.49472	-6.3042	0.000304394	0.00455353	0.715314	Down		54
TC0600009789.hg.1	TAB2	TGF-beta activated kinase 1 (MAP3K7) binding protein 2	-1.68598	7.04704	-6.26582	0.000316566	0.00466288	0.674438	Down		54
TC0200016452.hg.1	REL	REL proto-oncogene, NF-kB subunit	-1.66905	5.41715	-6.12688	0.00036538	0.00506283	0.524799	Down	oncogene	54
TC0300012784.hg.1	COMMD2	COMM domain containing 2	-1.58813	6.23731	-6.06692	0.000388981	0.005228	0.459418	Down		54
TC0500008296.hg.1	MAN2A1	mannosidase alpha class 2A member 1	-1.60266	4.37356	-5.96176	0.000434575	0.0055591	0.343554	Down		54
TC0800007308.hg.1	ERLIN2	ER lipid raft associated 2	-1.5689	4.62879	-4.79562	0.00163587	0.0125535	-1.04818	Down		54
TC0500010599.hg.1	OXCT1	3-oxoacid CoA-transferase 1	-2.55139	5.51158	-12.2941	3.09857e-06	0.00174206	5.27481	Down		52
TC1300007861.hg.1	PCCA	propionyl-CoA carboxylase subunit alpha	-2.02112	5.40014	-10.2789	1.10777e-05	0.00174206	4.06911	Down		52
TC0300013334.hg.1	MCCC1	methylcrotonyl-CoA carboxylase subunit 1	-2.00188	6.36642	-10.0887	1.26348e-05	0.00174206	3.94127	Down		52
TC0400011188.hg.1	LIN54	lin-54 DREAM MuvB core complex component	-1.87841	4.36889	-9.54465	1.86343e-05	0.00174206	3.56039	Down		52
TC0X00009117.hg.1	FANCB	FA complementation group B	-1.95283	4.15273	-8.92501	2.97117e-05	0.00189399	3.09719	Down		52
TC0100017948.hg.1	CHML	CHM like Rab escort protein	-1.84124	6.28908	-8.5812	3.89549e-05	0.00198254	2.8256	Down		52
TC1400009834.hg.1	GTF2A1	general transcription factor IIA subunit 1	-1.83811	6.04481	-8.49261	4.18323e-05	0.00200215	2.75384	Down		52
TC0600008350.hg.1	BAG2	BAG cochaperone 2	-1.88576	7.53202	-8.42554	4.41694e-05	0.00203801	2.69902	Down		52
TC0100015627.hg.1	PRKAB2	protein kinase AMP-activated non-catalytic subunit beta 2	-1.72452	6.21585	-8.25371	5.08549e-05	0.00212427	2.55656	Down		52
TC0200016727.hg.1	IWS1	interacts with SUPT6H, CTD assembly factor 1	-1.79114	6.55165	-8.07044	5.92633e-05	0.00223328	2.4014	Down		52
TC1200012576.hg.1	NDUFA9	NADH:ubiquinone oxidoreductase subunit A9	-1.54706	6.94719	-7.73778	7.88161e-05	0.0024848	2.11095	Down		52
TC0800008267.hg.1	INTS8	integrator complex subunit 8	-1.78486	6.49157	-7.63647	8.61349e-05	0.00255107	2.02016	Down		52
TC1200007612.hg.1	LARP4	La ribonucleoprotein 4	-2.2296	5.07938	-7.60546	8.85245e-05	0.00257207	1.99215	Down		52
TC0500011490.hg.1	TTC37	tetratricopeptide repeat domain 37	-2.72908	5.98652	-7.09425	0.000140843	0.00311768	1.5148	Down		52
TC0200008281.hg.1	PTCD3	pentatricopeptide repeat domain 3	-1.50045	5.16128	-6.80789	0.000184785	0.00350444	1.23403	Down		52
TC0100008697.hg.1	CTH	cystathionine gamma-lyase	-1.76763	5.9655	-6.59467	0.000227475	0.00391192	1.01842	Down		52
TC1200011755.hg.1	NFYB	nuclear transcription factor Y subunit beta	-1.52279	6.75806	-6.43719	0.000266071	0.00423713	0.855459	Down		52
TC0600009508.hg.1	TBPL1	TATA-box binding protein like 1	-1.70118	7.53061	-6.30352	0.000304604	0.00455511	0.714593	Down		52
TC1200006966.hg.1	STRAP	serine/threonine kinase receptor associated protein	-2.21152	7.57713	-10.6322	8.72596e-06	0.00174206	4.29957	Down		50
TC0400012846.hg.1	NAA15	N-alpha-acetyltransferase 15, NatA auxiliary subunit	-2.31322	7.27084	-10.6312	8.73161e-06	0.00174206	4.29895	Down		50
TC0800006680.hg.1	TNKS	tankyrase	-2.01861	4.96273	-9.8326	1.51353e-05	0.00174206	3.76485	Down		50
TC0900009645.hg.1	HAUS6	HAUS augmin like complex subunit 6	-2.35617	5.52785	-9.8045	1.5442e-05	0.00174206	3.74518	Down		50
TC0200012405.hg.1	THADA	THADA armadillo repeat containing	-2.4559	3.50985	-9.75602	1.59877e-05	0.00174206	3.71111	Down		50
TC1000006859.hg.1	SUV39H2	suppressor of variegation 3-9 homolog 2	-1.98819	5.30031	-9.65729	1.71673e-05	0.00174206	3.64116	Down		50
TC0100017523.hg.1	LIN9	lin-9 DREAM MuvB core complex component	-1.96751	5.02293	-9.23514	2.34457e-05	0.0017916	3.33311	Down		50
TC1000009095.hg.1	SEC23IP	SEC23 interacting protein	-2.17998	5.98877	-8.89831	3.03337e-05	0.00190938	3.07648	Down		50
TC1400009295.hg.1	EXOC5	exocyst complex component 5	-2.48736	5.71445	-8.82476	3.21238e-05	0.00191652	3.01912	Down		50
TC0400012029.hg.1	OTUD4	OTU deubiquitinase 4	-2.53467	4.79984	-8.80141	3.27168e-05	0.00192546	3.0008	Down		50
TC0800012422.hg.1	VCPIP1	valosin containing protein interacting protein 1	-1.73427	4.76015	-8.7907	3.29928e-05	0.00192547	2.99238	Down		50
TC0600008562.hg.1	SENP6	SUMO specific peptidase 6	-1.85548	5.44309	-8.55165	3.9889e-05	0.00198916	2.80175	Down		50
TC1200012663.hg.1	RAB3IP	RAB3A interacting protein	-1.85831	6.84334	-8.49405	4.17837e-05	0.00200215	2.75501	Down		50
TC0300009167.hg.1	EIF2A	eukaryotic translation initiation factor 2A	-1.58123	6.4131	-8.0474	6.04264e-05	0.00224471	2.38166	Down		50
TC0600006731.hg.1	PRPF4B	pre-mRNA processing factor 4B	-1.80746	5.76151	-7.86519	7.05809e-05	0.00237335	2.22357	Down		50
TC0800009868.hg.1	TNFRSF10B	TNF receptor superfamily member 10b	-1.59476	5.8523	-7.84064	7.20898e-05	0.0023963	2.202	Down		50
TC0400012931.hg.1	G3BP2	G3BP stress granule assembly factor 2	-1.57342	9.11876	-7.75221	7.78316e-05	0.00247533	2.12379	Down		50
TC0100009965.hg.1	SNX27	sorting nexin 27	-2.35702	5.62045	-7.74079	7.86093e-05	0.00248008	2.11363	Down		50
TC0300011450.hg.1	TMF1	TATA element modulatory factor 1	-2.36937	5.89074	-7.21121	0.000126362	0.00297767	1.62667	Down		50
TC0200009431.hg.1	RAB3GAP1	RAB3 GTPase activating protein catalytic subunit 1	-2.26736	5.16985	-7.1737	0.000130816	0.00303203	1.59097	Down		50
TC0500012271.hg.1	TAF7	TATA-box binding protein associated factor 7	-1.77276	5.83111	-7.07673	0.000143168	0.00313424	1.49791	Down		50
TC0100018433.hg.1	RRAGC	Ras related GTP binding C	-2.00817	5.79647	-6.84262	0.000178717	0.00344515	1.26862	Down		50
TC1600007514.hg.1	KAT8	lysine acetyltransferase 8	-1.72004	6.35674	-6.51557	0.000246021	0.0040563	0.936962	Down		50
TC1300008720.hg.1	MTRF1	mitochondrial translation release factor 1	-1.51568	5.06617	-5.83991	0.000494973	0.00604744	0.207378	Down		50
TC1200011843.hg.1	SART3	spliceosome associated factor 3, U4/U6 recycling protein	-2.19272	5.65778	-5.80197	0.000515635	0.00619162	0.164556	Down		50
TC0500011418.hg.1	MEF2C	myocyte enhancer factor 2C	-1.7003	6.80008	-5.79544	0.000519286	0.00620552	0.157165	Down		50
TC0100017028.hg.1	PPP1R15B	protein phosphatase 1 regulatory subunit 15B	-1.65563	6.69277	-5.42962	0.000777909	0.00788663	-0.266693	Down		50
TC0900009855.hg.1	BAG1	BAG cochaperone 1	-2.07458	3.9237	-4.99193	0.00129175	0.0108425	-0.799728	Down		50
TC0400008228.hg.1	METAP1	methionyl aminopeptidase 1	-1.60698	6.94056	-4.68648	0.00186989	0.0137493	-1.18886	Down		50
TC0500007841.hg.1	AGGF1	angiogenic factor with G-patch and FHA domains 1	-2.42766	4.08929	-11.8248	4.09522e-06	0.00174206	5.01635	Down		48
TC0500008157.hg.1	LNPEP	leucyl and cystinyl aminopeptidase	-2.56174	6.15333	-11.3944	5.33635e-06	0.00174206	4.76803	Down		48
TC0800008145.hg.1	WWP1	WW domain containing E3 ubiquitin protein ligase 1	-2.36077	3.77014	-11.0682	6.56186e-06	0.00174206	4.57219	Down		48
TC0X00010099.hg.1	ABCB7	ATP binding cassette subfamily B member 7	-2.39844	6.60751	-10.944	7.10948e-06	0.00174206	4.49583	Down		48
TC0700010796.hg.1	VPS41	VPS41 subunit of HOPS complex	-1.82634	6.43625	-9.01285	2.77644e-05	0.0018833	3.16486	Down		48
TC0400011108.hg.1	CNOT6L	CCR4-NOT transcription complex subunit 6 like	-2.14407	6.42426	-8.97011	2.86935e-05	0.00188708	3.13202	Down		48
TC0300011036.hg.1	PRKAR2A	protein kinase cAMP-dependent type II regulatory subunit alpha	-1.77311	5.85058	-8.93337	2.95199e-05	0.00189399	3.10366	Down		48
TC0300007004.hg.1	PDCD6IP	programmed cell death 6 interacting protein	-1.81729	7.56805	-8.7666	3.36236e-05	0.00193361	2.9734	Down		48
TC0800006880.hg.1	PCM1	pericentriolar material 1	-1.95789	6.90668	-8.71146	3.51185e-05	0.00193732	2.92977	Down		48
TC1000007852.hg.1	HNRNPH3	heterogeneous nuclear ribonucleoprotein H3	-1.68166	8.91466	-8.42766	4.40934e-05	0.00203801	2.70075	Down		48
TC1200010145.hg.1	BCAT1	branched chain amino acid transaminase 1	-1.8959	7.87712	-8.31538	4.83332e-05	0.00209634	2.60802	Down		48
TC0600013603.hg.1	MTRF1L	mitochondrial translation release factor 1 like	-1.75843	5.05355	-8.17811	5.41499e-05	0.00215468	2.49296	Down		48
TC1800006679.hg.1	NAPG	NSF attachment protein gamma	-1.80537	6.40015	-8.13178	5.6287e-05	0.00218172	2.45371	Down		48
TC0100010134.hg.1	DAP3	death associated protein 3	-1.53335	7.49378	-7.68662	8.24213e-05	0.00252707	2.06524	Down		48
TC2000007231.hg.1	PHF20	PHD finger protein 20	-1.91606	5.94304	-7.68035	8.28756e-05	0.00252707	2.05962	Down		48
TC2100007850.hg.1	LTN1	listerin E3 ubiquitin protein ligase 1	-1.89313	6.63221	-7.65935	8.44173e-05	0.00253335	2.04077	Down		48
TC0400011749.hg.1	BBS7	Bardet-Biedl syndrome 7	-1.68449	6.30213	-7.60831	8.83017e-05	0.00257207	1.99473	Down		48
TC0100016676.hg.1	EDEM3	ER degradation enhancing alpha-mannosidase like protein 3	-1.71075	4.83064	-7.53423	9.43001e-05	0.00264455	1.92741	Down		48
TC0400011538.hg.1	PAPSS1	3'-phosphoadenosine 5'-phosphosulfate synthase 1	-1.71049	6.75831	-7.49102	9.80086e-05	0.00268948	1.88786	Down		48
TC1000012429.hg.1	PRPF18	pre-mRNA processing factor 18	-1.74912	4.51931	-7.22315	0.00012498	0.00296578	1.63799	Down		48
TC0700012555.hg.1	TNPO3	transportin 3	-1.67601	7.82149	-6.79622	0.000186875	0.00352022	1.22238	Down		48
TC0200012257.hg.1	EIF2AK2	eukaryotic translation initiation factor 2 alpha kinase 2	-1.7517	6.88367	-6.73786	0.000197731	0.00361953	1.16385	Down		48
TC0300013874.hg.1	SRPRB	SRP receptor subunit beta	-1.59211	5.38696	-6.57022	0.000233034	0.00395355	0.99333	Down		48
TC1500010743.hg.1	MAPK6	mitogen-activated protein kinase 6	-1.72789	7.11965	-6.56944	0.000233216	0.00395355	0.992522	Down		48
TC1700010488.hg.1	ACACA	acetyl-CoA carboxylase alpha	-2.03988	6.08866	-6.33595	0.000294717	0.00446536	0.748981	Down		48
TC1400009711.hg.1	NEK9	NIMA related kinase 9	-1.79662	3.91512	-6.29349	0.000307736	0.00457985	0.703933	Down		48
TC1300008879.hg.1	MED4	mediator complex subunit 4	-2.10105	5.29725	-5.84955	0.000489871	0.00600573	0.218226	Down		48
TC1100011723.hg.1	RSF1	remodeling and spacing factor 1	-1.65005	6.8931	-5.81482	0.000508532	0.00615113	0.17908	Down		48
TC0100009142.hg.1	PTBP2	polypyrimidine tract binding protein 2	-1.94088	4.62825	-5.64575	0.000611386	0.00685473	-0.0139385	Down		48
TC2000009023.hg.1	SAMHD1	SAM and HD domain containing deoxynucleoside triphosphate triphosphohydrolase 1	-2.07342	4.75382	-5.64045	0.000614968	0.00687067	-0.020063	Down		48
TC0100015061.hg.1	DBT	dihydrolipoamide branched chain transacylase E2	-1.83717	4.60112	-5.59864	0.000644013	0.00709771	-0.0684608	Down		48
TC2200006833.hg.1	BCR	BCR activator of RhoGEF and GTPase	-2.40908	6.9348	-11.5781	4.76116e-06	0.00174206	4.87536	Down		46
TC1400007761.hg.1	AHSA1	activator of HSP90 ATPase activity 1	-2.1669	6.95322	-10.9833	6.9308e-06	0.00174206	4.5201	Down		46
TC1000010117.hg.1	ACBD5	acyl-CoA binding domain containing 5	-2.02218	5.30525	-10.2654	1.11808e-05	0.00174206	4.06012	Down		46
TC0500013088.hg.1	MAPK9	mitogen-activated protein kinase 9	-2.03266	5.97474	-10.1743	1.19057e-05	0.00174206	3.99912	Down		46
TC1000010022.hg.1	PIP4K2A	phosphatidylinositol-5-phosphate 4-kinase type 2 alpha	-1.99263	7.52974	-9.54075	1.86876e-05	0.00174206	3.55758	Down		46
TC1200012842.hg.1	ANAPC7	anaphase promoting complex subunit 7	-2.29877	7.07235	-9.47539	1.9606e-05	0.00174206	3.51022	Down		46
TC0300008989.hg.1	SLC25A36	solute carrier family 25 member 36	-1.94332	5.65492	-8.74358	3.42387e-05	0.00193574	2.95522	Down		46
TC0700011383.hg.1	SBDS	SBDS ribosome maturation factor	-2.03948	7.17283	-8.6135	3.79613e-05	0.00197793	2.85158	Down	TSG	46
TC1700011451.hg.1	SMURF2	SMAD specific E3 ubiquitin protein ligase 2	-1.69983	5.08221	-8.61078	3.80441e-05	0.00197793	2.84939	Down		46
TC0X00009341.hg.1	DMD	dystrophin	-1.75887	3.82491	-8.04818	6.03868e-05	0.00224471	2.38232	Down		46
TC1200010407.hg.1	KIF21A	kinesin family member 21A	-2.01476	5.605	-8.03127	6.12563e-05	0.00224881	2.36779	Down		46
TC0X00011309.hg.1	HNRNPH2	heterogeneous nuclear ribonucleoprotein H2	-1.88041	6.29519	-7.97005	6.45226e-05	0.00227913	2.31496	Down		46
TC1400008590.hg.1	OSGEP	O-sialoglycoprotein endopeptidase	-1.75354	5.39668	-7.89021	6.90796e-05	0.00234878	2.24548	Down		46
TC0800007681.hg.1	TGS1	trimethylguanosine synthase 1	-1.77574	5.75447	-7.83503	7.24396e-05	0.00240241	2.19706	Down		46
TC0300006942.hg.1	STT3B	STT3 oligosaccharyltransferase complex catalytic subunit B	-1.81342	7.97628	-7.73638	7.89123e-05	0.00248602	2.1097	Down		46
TC1600007753.hg.1	LONP2	lon peptidase 2, peroxisomal	-1.8486	6.79855	-7.72437	7.97435e-05	0.00249611	2.099	Down		46
TC0300008846.hg.1	DNAJC13	DnaJ heat shock protein family (Hsp40) member C13	-1.89527	3.91105	-7.48298	9.87159e-05	0.00269383	1.88048	Down		46
TC0100017974.hg.1	CEP170	centrosomal protein 170	-1.54684	6.85136	-7.45999	0.000100772	0.00271891	1.85933	Down		46
TC2000007620.hg.1	ARFGEF2	ADP ribosylation factor guanine nucleotide exchange factor 2	-1.82857	4.63299	-6.97739	0.000157186	0.00326605	1.40143	Down		46
TC1100007266.hg.1	PDHX	pyruvate dehydrogenase complex component X	-1.80318	6.52413	-6.91765	0.000166351	0.00333563	1.34283	Down		46
TC1000012549.hg.1	PARG	poly(ADP-ribose) glycohydrolase	-1.57614	5.32542	-6.8609	0.000175613	0.00341489	1.28676	Down		46
TC0100014788.hg.1	ZNHIT6	zinc finger HIT-type containing 6	-2.75672	4.1947	-6.76211	0.000193137	0.00359343	1.18823	Down		46
TC0400010465.hg.1	UGDH	UDP-glucose 6-dehydrogenase	-2.09803	6.17156	-6.53013	0.000242483	0.00403587	0.952022	Down		46
TC1700007942.hg.1	NBR1	NBR1 autophagy cargo receptor	-1.80301	5.9599	-6.49238	0.000251773	0.00411129	0.912928	Down		46
TC0500007123.hg.1	DNAJC21	DnaJ heat shock protein family (Hsp40) member C21	-2.04326	5.80685	-6.45415	0.000261584	0.00420077	0.873159	Down		46
TC2200008482.hg.1	EIF4ENIF1	eukaryotic translation initiation factor 4E nuclear import factor 1	-1.71475	5.42399	-6.31075	0.000302369	0.00453418	0.72227	Down		46
TC0500013237.hg.1	HARS2	histidyl-tRNA synthetase 2, mitochondrial	-1.70753	4.40645	-4.77432	0.0016789	0.01278	-1.0755	Down		46
TC0200012522.hg.1	FBXO11	F-box protein 11	-2.65532	5.53472	-11.3887	5.35552e-06	0.00174206	4.76465	Down	TSG	44
TC0400007978.hg.1	ENOPH1	enolase-phosphatase 1	-2.18919	6.83923	-10.5551	9.18658e-06	0.00174206	4.25006	Down		44
TC1200012706.hg.1	ACAD10	acyl-CoA dehydrogenase family member 10	-2.0377	3.1463	-10.2494	1.13046e-05	0.00174206	4.04944	Down		44
TC1200007052.hg.1	GOLT1B	golgi transport 1B	-2.06914	6.43571	-10.2479	1.13165e-05	0.00174206	4.04842	Down		44
TC0300010676.hg.1	CLASP2	cytoplasmic linker associated protein 2	-2.26891	6.15645	-10.071	1.27922e-05	0.00174206	3.92921	Down		44
TC0600012529.hg.1	RNGTT	RNA guanylyltransferase and 5'-phosphatase	-2.77555	6.2971	-9.62724	1.75456e-05	0.00174206	3.61971	Down		44
TC0900011842.hg.1	SURF4	surfeit 4	-1.96092	6.49668	-9.54034	1.86931e-05	0.00174206	3.55728	Down		44
TC0100013087.hg.1	RCC2	regulator of chromosome condensation 2	-1.89753	7.54972	-9.41932	2.04345e-05	0.00175664	3.46932	Down		44
TC0200007785.hg.1	UGP2	UDP-glucose pyrophosphorylase 2	-2.04913	5.14801	-8.85954	3.12629e-05	0.00191291	3.0463	Down		44
TC0500011672.hg.1	PJA2	praja ring finger ubiquitin ligase 2	-1.79663	6.7862	-8.78704	3.30876e-05	0.00192547	2.98951	Down		44
TC0600008632.hg.1	BCKDHB	branched chain keto acid dehydrogenase E1 subunit beta	-1.87976	5.40525	-8.68974	3.57274e-05	0.0019416	2.91252	Down		44
TC1000007891.hg.1	HK1	hexokinase 1	-1.74288	8.08883	-8.47768	4.23404e-05	0.00200883	2.74167	Down		44
TC0300013357.hg.1	PARL	presenilin associated rhomboid like	-1.89712	6.0611	-8.35618	4.67417e-05	0.0020842	2.64186	Down		44
TC1400008838.hg.1	STRN3	striatin 3	-1.69759	6.00351	-8.24178	5.13596e-05	0.00213526	2.54656	Down		44
TC2000008473.hg.1	KIF16B	kinesin family member 16B	-1.84437	4.6396	-8.21047	5.27109e-05	0.00213526	2.52026	Down		44
TC1100011092.hg.1	GANAB	glucosidase II alpha subunit	-2.01492	7.76668	-8.08259	5.86603e-05	0.00222007	2.41179	Down		44
TC1200009253.hg.1	ATP6V0A2	ATPase H+ transporting V0 subunit a2	-1.70983	6.03095	-7.93924	6.62399e-05	0.00230048	2.28823	Down		44
TC0700010185.hg.1	EIF2AK1	eukaryotic translation initiation factor 2 alpha kinase 1	-1.86385	9.15199	-7.88819	6.91996e-05	0.00234878	2.24371	Down		44
TC1300006914.hg.1	UFM1	ubiquitin fold modifier 1	-1.5654	5.81565	-7.84509	7.18136e-05	0.00239261	2.20591	Down		44
TC0400007120.hg.1	RBPJ	recombination signal binding protein for immunoglobulin kappa J region	-1.78987	5.17821	-7.80531	7.43247e-05	0.00241511	2.17085	Down		44
TC1100012033.hg.1	MTMR2	myotubularin related protein 2	-1.60253	6.17503	-7.59299	8.95066e-05	0.00258355	1.98086	Down		44
TC1400010620.hg.1	SNAPC1	small nuclear RNA activating complex polypeptide 1	-1.69183	6.09506	-7.31676	0.00011471	0.00287716	1.72624	Down		44
TC1900006764.hg.1	SAFB	scaffold attachment factor B	-2.07664	6.61625	-7.21229	0.000126237	0.00297767	1.62769	Down		44
TC0500012032.hg.1	AFF4	AF4/FMR2 family member 4	-1.85525	6.74446	-7.0516	0.000146577	0.00316028	1.47362	Down	oncogene, fusion	44
TC0500007729.hg.1	MCCC2	methylcrotonyl-CoA carboxylase subunit 2	-1.50463	7.03759	-6.58994	0.000228538	0.00391887	1.01357	Down		44
TC1100008187.hg.1	PPP6R3	protein phosphatase 6 regulatory subunit 3	-1.61777	5.81791	-6.5759	0.00023173	0.00394659	0.999164	Down		44
TC0800006933.hg.1	ATP6V1B2	ATPase H+ transporting V1 subunit B2	-1.80478	6.38495	-6.53354	0.000241664	0.00402901	0.955536	Down		44
TC0300013458.hg.1	RPL39L	ribosomal protein L39 like	-1.60543	3.98791	-6.45389	0.000261653	0.00420077	0.872884	Down		44
TC1700011369.hg.1	MED13	mediator complex subunit 13	-1.88834	7.47874	-6.34389	0.000292351	0.00444724	0.757379	Down		44
TC0300007165.hg.1	NKTR	natural killer cell triggering receptor	-1.55885	7.27156	-6.33996	0.000293517	0.00445617	0.753231	Down		44
TC0100015346.hg.1	TRIM33	tripartite motif containing 33	-1.61828	7.1981	-6.32095	0.000299244	0.00450443	0.733097	Down	TSG, fusion	44
TC1700010738.hg.1	EZH1	enhancer of zeste 1 polycomb repressive complex 2 subunit	-1.67039	5.61549	-6.07173	0.000387025	0.00521786	0.464686	Down		44
TC0300013978.hg.1	USP4	ubiquitin specific peptidase 4	-1.55232	5.34092	-5.99508	0.000419516	0.0054593	0.380432	Down		44
TC2200008514.hg.1	RTCB	RNA 2',3'-cyclic phosphate and 5'-OH ligase	-1.91758	7.37068	-5.8125	0.000509807	0.0061614	0.176459	Down		44
TC0800008940.hg.1	PHF20L1	PHD finger protein 20 like 1	-1.62568	5.82114	-5.65521	0.000605061	0.00680957	-0.0030344	Down		44
TC0600009102.hg.1	FIG4	FIG4 phosphoinositide 5-phosphatase	-2.27611	4.46507	-5.57136	0.000663779	0.0071986	-0.100172	Down		44
TC0100018339.hg.1	MDM4	MDM4 regulator of p53	-1.96401	5.96603	-5.5318	0.000693651	0.00737441	-0.146358	Down	oncogene	44
TC1000009714.hg.1	PRKCQ	protein kinase C theta	-1.67461	5.60266	-5.19749	0.00101464	0.00927705	-0.545818	Down		44
TC0300013103.hg.1	RPL22L1	ribosomal protein L22 like 1	-1.86331	6.19623	-5.04983	0.00120609	0.0103708	-0.727563	Down		44
TC0300010026.hg.1	FBXO45	F-box protein 45	-2.29798	4.30563	-9.72888	1.63026e-05	0.00174206	3.69196	Down		42
TC1700011366.hg.1	INTS2	integrator complex subunit 2	-2.36229	4.28636	-9.67079	1.70004e-05	0.00174206	3.65077	Down		42
TC0900008463.hg.1	HSDL2	hydroxysteroid dehydrogenase like 2	-1.924	7.14813	-9.60828	1.77891e-05	0.00174206	3.60614	Down		42
TC1500007056.hg.1	ADAL	adenosine deaminase like	-1.9748	5.59642	-9.43857	2.01457e-05	0.00174206	3.48339	Down		42
TC0700010692.hg.1	NT5C3A	5'-nucleotidase, cytosolic IIIA	-2.18481	6.59971	-9.34067	2.16638e-05	0.00176109	3.4115	Down		42
TC1100006812.hg.1	ZNF143	zinc finger protein 143	-2.04406	7.13327	-9.14926	2.50178e-05	0.00181314	3.26862	Down		42
TC0X00010803.hg.1	AIFM1	apoptosis inducing factor mitochondria associated 1	-1.992	6.5619	-8.54123	4.02246e-05	0.00198916	2.79332	Down		42
TC1100011089.hg.1	MTA2	metastasis associated 1 family member 2	-2.00699	7.83087	-8.53068	4.05676e-05	0.00198916	2.78477	Down		42
TC0800008184.hg.1	DECR1	2,4-dienoyl-CoA reductase 1	-1.71075	7.68955	-8.4118	4.46662e-05	0.00204974	2.68773	Down		42
TC0800008783.hg.1	SQLE	squalene epoxidase	-2.56927	7.04531	-8.26635	5.03262e-05	0.00211292	2.56714	Down		42
TC0400010167.hg.1	DCAF16	DDB1 and CUL4 associated factor 16	-1.69068	7.84996	-8.22117	5.22446e-05	0.00213526	2.52926	Down		42
TC1400008913.hg.1	SNX6	sorting nexin 6	-1.70916	7.31979	-8.04333	6.06347e-05	0.00224471	2.37816	Down		42
TC0300014047.hg.1	ISY1-RAB43	ISY1-RAB43 readthrough	-1.84589	4.70084	-7.72811	7.9484e-05	0.0024955	2.10233	Down		42
TC0900012272.hg.1	RC3H2	ring finger and CCCH-type domains 2	-1.61215	6.61973	-7.57899	9.06233e-05	0.0025963	1.96816	Down		42
TC0800007440.hg.1	VDAC3	voltage dependent anion channel 3	-1.68933	7.73361	-7.51982	9.55185e-05	0.00266184	1.91425	Down		42
TC1700010497.hg.1	SYNRG	synergin gamma	-1.51048	5.65264	-7.49953	9.72653e-05	0.00267924	1.89566	Down		42
TC0300014043.hg.1	ISY1	ISY1 splicing factor homolog	-1.85509	5.83427	-7.28535	0.000118047	0.00290382	1.69674	Down		42
TC0300013264.hg.1	GNB4	G protein subunit beta 4	-1.91902	6.15277	-7.26744	0.000119998	0.0029184	1.67988	Down		42
TC1700010076.hg.1	USP22	ubiquitin specific peptidase 22	-1.5075	7.43934	-7.2228	0.00012502	0.00296578	1.63766	Down		42
TC0200016586.hg.1	HSPE1-MOB4	HSPE1-MOB4 readthrough	-2.25382	5.56106	-7.05683	0.00014586	0.00314872	1.47868	Down		42
TC0100011920.hg.1	GALNT2	polypeptide N-acetylgalactosaminyltransferase 2	-1.72748	5.60171	-6.80358	0.000185554	0.00350627	1.22973	Down		42
TC0100014653.hg.1	USP33	ubiquitin specific peptidase 33	-1.6327	6.74627	-6.6179	0.000222327	0.00386066	1.04219	Down		42
TC1000009345.hg.1	GLRX3	glutaredoxin 3	-1.77245	6.72063	-6.6054	0.000225081	0.00388672	1.02941	Down		42
TC1700011783.hg.1	SRP68	signal recognition particle 68	-1.50131	6.61651	-6.50559	0.000248478	0.00407429	0.926627	Down		42
TC0X00009139.hg.1	AP1S2	adaptor related protein complex 1 subunit sigma 2	-1.84204	7.07596	-6.46852	0.000257847	0.00416406	0.88813	Down		42
TC0100007949.hg.1	ZMPSTE24	zinc metallopeptidase STE24	-1.526	5.31352	-6.36454	0.000286295	0.00440298	0.779183	Down		42
TC0300012023.hg.1	SPICE1	spindle and centriole associated protein 1	-1.71232	3.71105	-6.04553	0.000397804	0.00529576	0.435981	Down		42
TC1700006676.hg.1	RABEP1	rabaptin, RAB GTPase binding effector protein 1	-2.01191	6.04572	-6.03901	0.000400542	0.00531265	0.428814	Down		42
TC0300008002.hg.1	CHMP2B	charged multivesicular body protein 2B	-1.84704	4.9346	-5.54767	0.000681494	0.00729954	-0.127806	Down		42
TC0800008467.hg.1	ATP6V1C1	ATPase H+ transporting V1 subunit C1	-2.62041	5.14293	-11.9194	3.86813e-06	0.00174206	5.06949	Down		40
TC0200009949.hg.1	DCAF17	DDB1 and CUL4 associated factor 17	-2.45651	6.08359	-11.0562	6.61269e-06	0.00174206	4.56485	Down		40
TC0500009321.hg.1	MAT2B	methionine adenosyltransferase 2B	-2.22999	6.06175	-9.76244	1.59142e-05	0.00174206	3.71563	Down		40
TC1100012992.hg.1	HSD17B12	hydroxysteroid 17-beta dehydrogenase 12	-2.01766	6.27026	-9.71486	1.6468e-05	0.00174206	3.68204	Down		40
TC1400007328.hg.1	DAAM1	dishevelled associated activator of morphogenesis 1	-2.40621	5.16675	-9.57696	1.81996e-05	0.00174206	3.58366	Down		40
TC0100011958.hg.1	GNPAT	glyceronephosphate O-acyltransferase	-1.8464	6.13222	-9.15756	2.48609e-05	0.00180873	3.27487	Down		40
TC0400012818.hg.1	CCNG2	cyclin G2	-2.02974	6.79964	-9.14189	2.51582e-05	0.00181608	3.26305	Down		40
TC0800012428.hg.1	UBE2W	ubiquitin conjugating enzyme E2 W	-2.46769	4.80403	-8.86571	3.11128e-05	0.00191291	3.05112	Down		40
TC0100016969.hg.1	KLHL12	kelch like family member 12	-2.27781	6.12965	-8.86011	3.1249e-05	0.00191291	3.04675	Down		40
TC2200007419.hg.1	TNRC6B	trinucleotide repeat containing adaptor 6B	-1.75602	6.26839	-8.85759	3.13106e-05	0.00191291	3.04478	Down		40
TC0400007280.hg.1	WDR19	WD repeat domain 19	-1.79984	4.10335	-8.76413	3.36889e-05	0.00193361	2.97146	Down		40
TC0800011625.hg.1	TAF2	TATA-box binding protein associated factor 2	-2.01877	6.918	-8.57312	3.92077e-05	0.00198378	2.81909	Down		40
TC0100010546.hg.1	BLZF1	basic leucine zipper nuclear factor 1	-2.57773	6.9385	-8.46496	4.27787e-05	0.00202079	2.73129	Down		40
TC0500008431.hg.1	DMXL1	Dmx like 1	-1.64759	6.41323	-8.15077	5.54e-05	0.00217437	2.46982	Down		40
TC0100013758.hg.1	INPP5B	inositol polyphosphate-5-phosphatase B	-1.6045	6.02375	-7.97799	6.40884e-05	0.00227676	2.32183	Down		40
TC0200010443.hg.1	CFLAR	CASP8 and FADD like apoptosis regulator	-1.84398	7.12592	-7.89627	6.87212e-05	0.00234451	2.25078	Down		40
TC1000007103.hg.1	RAB18	RAB18, member RAS oncogene family	-1.57618	5.93661	-7.42758	0.000103752	0.00275984	1.82942	Down		40
TC1100008447.hg.1	SPCS2	signal peptidase complex subunit 2	-1.93908	5.42792	-7.42271	0.000104208	0.00276521	1.82491	Down		40
TC1300006481.hg.1	ZMYM2	zinc finger MYM-type containing 2	-2.33724	4.70976	-7.23457	0.000123673	0.00296326	1.64882	Down		40
TC0300008888.hg.1	CEP63	centrosomal protein 63	-1.52371	6.02021	-7.23399	0.00012374	0.00296326	1.64826	Down		40
TC0900011013.hg.1	ERP44	endoplasmic reticulum protein 44	-1.79093	8.22583	-7.0771	0.000143118	0.00313424	1.49827	Down		40
TC0100013466.hg.1	SPCS2	signal peptidase complex subunit 2	-1.62022	6.21948	-6.87776	0.000172801	0.0033971	1.30347	Down		40
TC0200009091.hg.1	RALB	RAS like proto-oncogene B	-1.68913	6.52991	-6.81989	0.000182663	0.00348042	1.246	Down		40
TC0500009725.hg.1	CNOT6	CCR4-NOT transcription complex subunit 6	-1.56706	5.78857	-6.78859	0.000188256	0.00353484	1.21476	Down		40
TC0100010654.hg.1	KLHL20	kelch like family member 20	-1.75027	5.62289	-6.50182	0.000249414	0.00408138	0.922719	Down		40
TC1600009849.hg.1	XPO6	exportin 6	-1.7679	5.50151	-6.41418	0.000272301	0.00427064	0.83137	Down		40
TC0200011803.hg.1	NBAS	NBAS subunit of NRZ tethering complex	-1.84578	6.4058	-6.25931	0.000318684	0.00467463	0.667483	Down		40
TC0100014762.hg.1	SSX2IP	SSX family member 2 interacting protein	-2.44681	6.17684	-6.16431	0.000351453	0.00494523	0.565368	Down		40
TC0100006781.hg.1	SLC25A33	solute carrier family 25 member 33	-2.48402	5.79195	-6.12945	0.000364401	0.00505849	0.527598	Down		40
TC0600009753.hg.1	STXBP5	syntaxin binding protein 5	-2.28003	5.50254	-6.10489	0.000373845	0.00511653	0.500879	Down		40
TC1200008026.hg.1	LEMD3	LEM domain containing 3	-1.95298	6.263	-5.99163	0.000421049	0.00546445	0.376618	Down		40
TC0200010837.hg.1	ANKZF1	ankyrin repeat and zinc finger peptidyl tRNA hydrolase 1	-1.66169	6.14933	-5.43877	0.000769927	0.00783867	-0.255865	Down		40
TC0200016419.hg.1	GPN1	GPN-loop GTPase 1	-1.6887	5.43414	-5.39726	0.000806915	0.00805015	-0.305136	Down		40
TC0100007447.hg.1	CEP85	centrosomal protein 85	-1.7265	6.35214	-4.99983	0.00127968	0.010785	-0.789854	Down		40
TC0200016757.hg.1	NCKAP1	NCK associated protein 1	-2.91661	5.52349	-11.7167	4.37301e-06	0.00174206	4.95505	Down		38
TC0100016658.hg.1	ARPC5	actin related protein 2/3 complex subunit 5	-1.93628	6.62317	-9.52979	1.88382e-05	0.00174206	3.54966	Down		38
TC0X00008081.hg.1	ATG4A	autophagy related 4A cysteine peptidase	-1.97673	4.7334	-9.08759	2.62199e-05	0.00184782	3.22191	Down		38
TC1000012538.hg.1	MTPAP	mitochondrial poly(A) polymerase	-1.86768	5.54022	-9.01969	2.76188e-05	0.00187929	3.17011	Down		38
TC0800006837.hg.1	TUSC3	tumor suppressor candidate 3	-2.14267	7.45415	-8.88437	3.06641e-05	0.00191291	3.06565	Down		38
TC1000011704.hg.1	NT5C2	5'-nucleotidase, cytosolic II	-1.81904	4.8357	-8.79825	3.27979e-05	0.00192546	2.99832	Down	oncogene	38
TC1000011427.hg.1	IDE	insulin degrading enzyme	-2.43491	4.47134	-8.77262	3.34648e-05	0.00193361	2.97815	Down		38
TC1200008820.hg.1	IFT81	intraflagellar transport 81	-1.7527	3.16336	-8.59932	3.83941e-05	0.00198014	2.84019	Down		38
TC0200012956.hg.1	GFPT1	glutamine--fructose-6-phosphate transaminase 1	-1.82633	8.40811	-8.37785	4.59206e-05	0.00206555	2.65976	Down		38
TC1600011424.hg.1	DDX19B	DEAD-box helicase 19B	-1.62097	6.30419	-8.10851	5.73958e-05	0.0022049	2.43391	Down		38
TC0300010413.hg.1	ANKRD28	ankyrin repeat domain 28	-1.92537	5.58431	-8.00305	6.27384e-05	0.00227246	2.34349	Down		38
TC0100009568.hg.1	MAN1A2	mannosidase alpha class 1A member 2	-2.64444	6.9851	-7.96337	6.48908e-05	0.0022804	2.30917	Down		38
TC0200010788.hg.1	ARPC2	actin related protein 2/3 complex subunit 2	-1.63901	6.75492	-7.5046	9.68253e-05	0.00267221	1.90031	Down		38
TC0100007662.hg.1	KPNA6	karyopherin subunit alpha 6	-1.51582	7.25096	-7.45706	0.000101037	0.00272098	1.85664	Down		38
TC0500013414.hg.1	THOC3	THO complex 3	-2.21971	8.21527	-7.32438	0.000113916	0.00286022	1.73339	Down		38
TC0300012881.hg.1	SLC33A1	solute carrier family 33 member 1	-2.58357	4.20714	-7.22804	0.000124419	0.00296376	1.64263	Down		38
TC0200016747.hg.1	TTC21B	tetratricopeptide repeat domain 21B	-1.55289	3.56305	-7.1698	0.000131289	0.00303327	1.58725	Down		38
TC1200007137.hg.1	FGFR1OP2	FGFR1 oncogene partner 2	-1.61401	5.90816	-7.02579	0.000150173	0.00320202	1.44859	Down		38
TC0200007353.hg.1	EML4	EMAP like 4	-1.73923	7.26777	-6.95428	0.000160663	0.00329874	1.37881	Down		38
TC0300014093.hg.1	PCYT1A	phosphate cytidylyltransferase 1A, choline	-1.80424	5.69646	-6.67752	0.000209703	0.00373357	1.10288	Down		38
TC0500013351.hg.1	FNIP1	folliculin interacting protein 1	-1.77657	6.27714	-6.5215	0.000244572	0.00403799	0.943103	Down		38
TC1700011910.hg.1	CYTH1	cytohesin 1	-1.66963	5.16886	-6.47413	0.000256403	0.00415882	0.893973	Down		38
TC0400012930.hg.1	COX18	cytochrome c oxidase assembly factor COX18	-1.98513	5.5325	-6.41822	0.000271194	0.00425678	0.835609	Down		38
TC0200007471.hg.1	RHOQ	ras homolog family member Q	-2.00977	6.24996	-6.36407	0.000286429	0.00440314	0.778696	Down		38
TC0300010035.hg.1	SENP5	SUMO specific peptidase 5	-2.13495	5.93088	-6.35755	0.000288328	0.00441513	0.771815	Down		38
TC0300010066.hg.1	FYTTD1	forty-two-three domain containing 1	-1.84718	8.25476	-6.24974	0.000321825	0.00469773	0.657257	Down		38
TC0100018238.hg.1	DNAJB4	DnaJ heat shock protein family (Hsp40) member B4	-1.57271	6.4238	-6.21446	0.000333711	0.00479705	0.619425	Down		38
TC2000007923.hg.1	NELFCD	negative elongation factor complex member C/D	-2.02882	6.52808	-5.95031	0.000439886	0.00559723	0.330848	Down		38
TC1000007199.hg.1	ZEB1	zinc finger E-box binding homeobox 1	-1.52693	4.94768	-5.7904	0.000522127	0.00622708	0.151451	Down	oncogene	38
TC0200016559.hg.1	BBS5	Bardet-Biedl syndrome 5	-1.82348	3.79523	-5.32483	0.000876238	0.00845505	-0.391708	Down		38
TC0500012280.hg.1	DIAPH1	diaphanous related formin 1	-1.57216	7.35468	-5.12506	0.001104	0.00980098	-0.634556	Down		38
TC0100007006.hg.1	SPEN	spen family transcriptional repressor	-1.58343	7.2873	-5.09109	0.00114887	0.0100372	-0.676451	Down	TSG	38
TC0X00007540.hg.1	DLG3	discs large MAGUK scaffold protein 3	-1.52926	5.654	-4.97222	0.00132242	0.0109873	-0.824408	Down		38
TC1100007363.hg.1	API5	apoptosis inhibitor 5	-2.22713	6.21625	-4.91158	0.00142191	0.0115057	-0.900715	Down		38
TC1800006841.hg.1	MIB1	MIB E3 ubiquitin protein ligase 1	-2.99223	4.86466	-12.7394	2.39939e-06	0.00174206	5.50885	Down		36
TC0800012447.hg.1	AZIN1	antizyme inhibitor 1	-2.50015	6.75734	-12.7043	2.44754e-06	0.00174206	5.49077	Down		36
TC0300008849.hg.1	UBA5	ubiquitin like modifier activating enzyme 5	-2.40336	4.63473	-11.8127	4.12516e-06	0.00174206	5.00955	Down		36
TC1100008398.hg.1	PAAF1	proteasomal ATPase associated factor 1	-2.24438	5.93677	-11.173	6.13639e-06	0.00174206	4.63588	Down		36
TC0800007330.hg.1	DDHD2	DDHD domain containing 2	-2.13079	6.67826	-10.7987	7.81656e-06	0.00174206	4.40519	Down		36
TC1200008591.hg.1	ACTR6	actin related protein 6	-2.10006	6.48676	-10.6184	8.80635e-06	0.00174206	4.29075	Down		36
TC0X00009100.hg.1	TRAPPC2	trafficking protein particle complex subunit 2	-2.15383	4.76023	-10.5089	9.47589e-06	0.00174206	4.22017	Down		36
TC1800006614.hg.1	RAB12	RAB12, member RAS oncogene family	-2.42947	4.67869	-10.4241	1.00344e-05	0.00174206	4.16488	Down		36
TC0600014300.hg.1	GCLC	glutamate-cysteine ligase catalytic subunit	-2.43227	5.22954	-9.87551	1.46801e-05	0.00174206	3.79475	Down		36
TC0X00009218.hg.1	RPS6KA3	ribosomal protein S6 kinase A3	-2.31431	4.3271	-9.83193	1.51425e-05	0.00174206	3.76438	Down		36
TC0200015729.hg.1	USP37	ubiquitin specific peptidase 37	-1.93371	4.85137	-9.49487	1.93271e-05	0.00174206	3.52437	Down		36
TC0100015598.hg.1	TXNIP	thioredoxin interacting protein	-2.03337	8.78389	-9.3035	2.22734e-05	0.00176109	3.384	Down		36
TC1500007009.hg.1	MGA	MAX dimerization protein MGA	-1.8828	5.6397	-9.25562	2.30874e-05	0.00178678	3.3484	Down		36
TC0600009127.hg.1	AMD1	adenosylmethionine decarboxylase 1	-2.09438	6.94363	-9.25126	2.31632e-05	0.00178678	3.34514	Down		36
TC0500009181.hg.1	CNOT8	CCR4-NOT transcription complex subunit 8	-1.80602	8.76111	-9.17683	2.45005e-05	0.00180714	3.28939	Down		36
TC0200014623.hg.1	STAM2	signal transducing adaptor molecule 2	-1.80367	4.94825	-9.16765	2.46715e-05	0.00180714	3.28248	Down		36
TC2100006852.hg.1	USP16	ubiquitin specific peptidase 16	-1.89156	6.65165	-8.83663	3.18272e-05	0.00191634	3.0284	Down		36
TC0400009379.hg.1	SPCS3	signal peptidase complex subunit 3	-1.91149	8.73289	-8.48785	4.19936e-05	0.00200215	2.74996	Down		36
TC1700011519.hg.1	HELZ	helicase with zinc finger	-1.92454	5.27006	-8.31706	4.82661e-05	0.00209634	2.60942	Down		36
TC1400009355.hg.1	TRMT5	tRNA methyltransferase 5	-2.09098	3.94825	-8.29949	4.89691e-05	0.00210064	2.5948	Down		36
TC0400010745.hg.1	CLOCK	clock circadian regulator	-2.34187	3.77773	-8.18786	5.37116e-05	0.00214962	2.5012	Down		36
TC0100008308.hg.1	ZFYVE9	zinc finger FYVE-type containing 9	-1.66837	4.05798	-8.05549	6.00155e-05	0.00224471	2.38859	Down		36
TC1200010550.hg.1	RPAP3	RNA polymerase II associated protein 3	-1.67215	5.84804	-8.02492	6.15863e-05	0.00225559	2.36233	Down		36
TC0500013361.hg.1	SAR1B	secretion associated Ras related GTPase 1B	-2.22264	6.39193	-7.74123	7.85796e-05	0.00248008	2.11402	Down		36
TC0700013584.hg.1	CYP51A1	cytochrome P450 family 51 subfamily A member 1	-1.87008	8.18583	-7.70042	8.14307e-05	0.00252283	2.0776	Down		36
TC1500007645.hg.1	MAP2K5	mitogen-activated protein kinase kinase 5	-2.03602	6.09021	-7.68063	8.28548e-05	0.00252707	2.05987	Down		36
TC0900009932.hg.1	STOML2	stomatin like 2	-1.5685	8.46154	-7.61481	8.7796e-05	0.00256833	2.00061	Down		36
TC0700008010.hg.1	GTF2I	general transcription factor IIi	-1.62867	7.27792	-7.56245	9.19629e-05	0.00260934	1.95312	Down		36
TC1600010409.hg.1	BBS2	Bardet-Biedl syndrome 2	-2.09385	4.53664	-7.29695	0.000116802	0.00288759	1.70765	Down		36
TC1100011751.hg.1	NARS2	asparaginyl-tRNA synthetase 2, mitochondrial	-1.96626	4.6541	-7.28286	0.000118316	0.00290555	1.6944	Down		36
TC0100018080.hg.1	AHCTF1	AT-hook containing transcription factor 1	-2.40223	5.97709	-7.23217	0.000123946	0.00296376	1.64654	Down		36
TC0500007314.hg.1	MRPS30	mitochondrial ribosomal protein S30	-2.09171	8.16294	-7.15275	0.000133381	0.00305552	1.57096	Down		36
TC0500007604.hg.1	PPWD1	peptidylprolyl isomerase domain and WD repeat containing 1	-1.82078	6.68952	-6.71715	0.000201753	0.00364704	1.14297	Down		36
TC0700009748.hg.1	ACTR3B	actin related protein 3B	-1.78483	4.88777	-6.56245	0.000234835	0.00396921	0.985332	Down		36
TC0200007477.hg.1	SOCS5	suppressor of cytokine signaling 5	-2.18533	4.28996	-6.54449	0.000239051	0.00400682	0.966839	Down		36
TC1700007042.hg.1	MPRIP	myosin phosphatase Rho interacting protein	-1.63824	6.40105	-6.45886	0.000260353	0.0041892	0.878065	Down		36
TC0300013911.hg.1	DNAJB11	DnaJ heat shock protein family (Hsp40) member B11	-1.62366	7.67723	-6.44546	0.000263874	0.00421754	0.864087	Down		36
TC0700006906.hg.1	KLHL7	kelch like family member 7	-1.57025	6.44323	-6.3333	0.000295511	0.00447149	0.746179	Down		36
TC1100007913.hg.1	MARK2	microtubule affinity regulating kinase 2	-1.61748	5.81068	-6.17654	0.000347031	0.00490504	0.578585	Down		36
TC0300013829.hg.1	RBM5	RNA binding motif protein 5	-1.56654	5.72267	-5.8394	0.000495244	0.00604769	0.206804	Down		36
TC0800006663.hg.1	ERI1	exoribonuclease 1	-2.29518	5.3876	-5.79791	0.000517901	0.00619745	0.159963	Down		36
TC0600008209.hg.1	CENPQ	centromere protein Q	-1.522	4.36647	-5.71072	0.000569362	0.00655627	0.0607131	Down		36
TC1400009006.hg.1	TRAPPC6B	trafficking protein particle complex subunit 6B	-1.98086	6.36706	-5.45799	0.000753439	0.00776181	-0.233137	Down		36
TC1200011812.hg.1	CRY1	cryptochrome circadian regulator 1	-1.62432	4.64668	-4.74177	0.00174705	0.0131126	-1.11737	Down		36
TC1200008182.hg.1	RAB21	RAB21, member RAS oncogene family	-2.52843	6.4206	-12.2371	3.20366e-06	0.00174206	5.24408	Down		34
TC0200010100.hg.1	AGPS	alkylglycerone phosphate synthase	-2.45579	6.42832	-11.5394	4.8763e-06	0.00174206	4.85291	Down		34
TC0400012900.hg.1	FBXL5	F-box and leucine rich repeat protein 5	-2.11676	4.26554	-10.736	8.14575e-06	0.00174206	4.36565	Down		34
TC1400007094.hg.1	KLHDC2	kelch domain containing 2	-2.28889	5.65433	-10.0782	1.27282e-05	0.00174206	3.9341	Down		34
TC0100012101.hg.1	MTR	5-methyltetrahydrofolate-homocysteine methyltransferase	-1.99309	5.29386	-9.99471	1.34943e-05	0.00174206	3.87709	Down		34
TC0100011533.hg.1	ATF3	activating transcription factor 3	-1.91474	5.62262	-9.67606	1.69358e-05	0.00174206	3.65451	Down		34
TC0400011040.hg.1	RCHY1	ring finger and CHY zinc finger domain containing 1	-2.00191	4.65129	-9.49293	1.93547e-05	0.00174206	3.52296	Down		34
TC1800007080.hg.1	GALNT1	polypeptide N-acetylgalactosaminyltransferase 1	-2.10243	4.5112	-8.97949	2.84864e-05	0.00188708	3.13925	Down		34
TC0600014143.hg.1	PHF3	PHD finger protein 3	-1.83665	7.83226	-8.8221	3.21907e-05	0.00191652	3.01703	Down		34
TC2100008165.hg.1	BRWD1	bromodomain and WD repeat domain containing 1	-2.45667	5.79459	-8.67176	3.62407e-05	0.00195439	2.89819	Down		34
TC0100015082.hg.1	DPH5	diphthamide biosynthesis 5	-1.86717	5.31419	-8.64532	3.70105e-05	0.00197512	2.87708	Down		34
TC1000012121.hg.1	OAT	ornithine aminotransferase	-1.70861	7.67726	-8.53063	4.0569e-05	0.00198916	2.78473	Down		34
TC1100008847.hg.1	CEP57	centrosomal protein 57	-2.28503	6.62039	-8.51693	4.10194e-05	0.00200082	2.77361	Down		34
TC0600008569.hg.1	MYO6	myosin VI	-1.73404	5.9571	-8.34743	4.7078e-05	0.00208546	2.63462	Down		34
TC2100006960.hg.1	IFNAR1	interferon alpha and beta receptor subunit 1	-1.6242	5.04429	-8.23521	5.16401e-05	0.00213526	2.54105	Down		34
TC0100010335.hg.1	USP21	ubiquitin specific peptidase 21	-1.82335	6.326	-8.04198	6.07041e-05	0.00224471	2.377	Down		34
TC1100012717.hg.1	PUS3	pseudouridine synthase 3	-1.74082	4.91501	-8.01791	6.19527e-05	0.00226008	2.3563	Down		34
TC0500011173.hg.1	POC5	POC5 centriolar protein	-2.16891	4.07314	-7.99028	6.34221e-05	0.00227544	2.33247	Down		34
TC0400010768.hg.1	AASDH	aminoadipate-semialdehyde dehydrogenase	-1.64535	3.96111	-7.88281	6.95201e-05	0.0023523	2.239	Down		34
TC0600012883.hg.1	TUBE1	tubulin epsilon 1	-1.5851	6.70172	-7.8524	7.13626e-05	0.00238307	2.21234	Down		34
TC1100008627.hg.1	ANKRD42	ankyrin repeat domain 42	-1.85368	5.17482	-7.69399	8.18907e-05	0.00252707	2.07184	Down		34
TC1700011233.hg.1	MRPS23	mitochondrial ribosomal protein S23	-1.52077	5.33462	-7.64078	8.58082e-05	0.00255049	2.02405	Down		34
TC0200009447.hg.1	UBXN4	UBX domain protein 4	-1.68682	7.77726	-7.59758	8.91439e-05	0.00257822	1.98501	Down		34
TC0400010995.hg.1	ANKRD17	ankyrin repeat domain 17	-1.54712	6.90436	-7.02081	0.000150879	0.00320448	1.44374	Down		34
TC0900011382.hg.1	FBXW2	F-box and WD repeat domain containing 2	-2.10957	7.3664	-6.90986	0.00016759	0.00335118	1.33515	Down		34
TC1100010976.hg.1	OSBP	oxysterol binding protein	-2.08583	6.19804	-6.82774	0.000181289	0.00347006	1.25382	Down		34
TC1100011545.hg.1	ANAPC15	anaphase promoting complex subunit 15	-1.67165	7.46539	-6.80491	0.000185316	0.00350627	1.23106	Down		34
TC0700013022.hg.1	ACTR3C	actin related protein 3C	-1.50751	4.09689	-6.72073	0.000201051	0.00364704	1.14659	Down		34
TC1000011050.hg.1	AP3M1	adaptor related protein complex 3 subunit mu 1	-1.67134	8.32609	-6.68476	0.000208223	0.0037138	1.11022	Down		34
TC0100011487.hg.1	TRAF5	TNF receptor associated factor 5	-1.62384	4.266	-6.53409	0.000241531	0.00402901	0.956109	Down		34
TC0X00010642.hg.1	NKRF	NFKB repressing factor	-1.88136	5.68747	-6.44689	0.000263494	0.00421678	0.865587	Down		34
TC0100014927.hg.1	EVI5	ecotropic viral integration site 5	-2.16807	4.80837	-6.00399	0.000415587	0.00543581	0.39027	Down		34
TC0200010275.hg.1	GLS	glutaminase	-1.59488	4.34021	-5.45679	0.000754453	0.00777041	-0.234548	Down		34
TC0200009487.hg.1	SPOPL	speckle type BTB/POZ protein like	-2.0742	4.37225	-5.37495	0.000827594	0.00815962	-0.331712	Down		34
TC0X00010169.hg.1	BRWD3	bromodomain and WD repeat domain containing 3	-1.94655	5.37966	-4.65269	0.00194962	0.0141079	-1.23279	Down		34
TC0800007738.hg.1	SDCBP	syndecan binding protein	-2.37783	7.92991	-10.989	6.90543e-06	0.00174206	4.5236	Down		32
TC0400012102.hg.1	LRBA	LPS responsive beige-like anchor protein	-2.29904	6.92288	-10.7175	8.24562e-06	0.00174206	4.35396	Down		32
TC0700006669.hg.1	MIOS	meiosis regulator for oocyte development	-2.16204	5.31203	-10.2942	1.09622e-05	0.00174206	4.07928	Down		32
TC2100008545.hg.1	NRIP1	nuclear receptor interacting protein 1	-2.54161	5.68674	-10.2795	1.10733e-05	0.00174206	4.0695	Down		32
TC0400007609.hg.1	REST	RE1 silencing transcription factor	-1.99191	5.31587	-9.69482	1.67078e-05	0.00174206	3.66784	Down		32
TC0600009240.hg.1	KPNA5	karyopherin subunit alpha 5	-1.98542	4.64276	-9.4049	2.0654e-05	0.00176109	3.45875	Down		32
TC0800010630.hg.1	GGH	gamma-glutamyl hydrolase	-2.12444	5.38963	-9.37182	2.11672e-05	0.00176109	3.43446	Down		32
TC1100006860.hg.1	USP47	ubiquitin specific peptidase 47	-2.42352	6.85122	-9.23118	2.35158e-05	0.0017916	3.33015	Down		32
TC0600013010.hg.1	MAN1A1	mannosidase alpha class 1A member 1	-1.97844	8.6082	-9.07029	2.65686e-05	0.00186332	3.20875	Down		32
TC0900006881.hg.1	IFT74	intraflagellar transport 74	-1.88879	3.51419	-8.98275	2.84149e-05	0.00188708	3.14176	Down		32
TC2000006755.hg.1	NDUFAF5	NADH:ubiquinone oxidoreductase complex assembly factor 5	-2.00444	4.40227	-8.93175	2.95571e-05	0.00189399	3.10241	Down		32
TC1900007754.hg.1	NUDT19	nudix hydrolase 19	-1.76659	5.1246	-8.725	3.47444e-05	0.00193732	2.94052	Down		32
TC1600011535.hg.1	SIAH1	siah E3 ubiquitin protein ligase 1	-2.51322	5.28024	-8.70177	3.53887e-05	0.00193732	2.92208	Down		32
TC1000006904.hg.1	STAM	signal transducing adaptor molecule	-1.89376	7.75485	-8.59195	3.8621e-05	0.00198014	2.83426	Down		32
TC0200016672.hg.1	RTN4	reticulon 4	-2.07877	9.52038	-8.56989	3.93095e-05	0.00198607	2.81648	Down		32
TC2200009266.hg.1	GTPBP1	GTP binding protein 1	-1.92915	5.88468	-8.56268	3.95374e-05	0.00198747	2.81066	Down		32
TC0800008531.hg.1	EMC2	ER membrane protein complex subunit 2	-2.05593	6.85395	-8.53482	4.04325e-05	0.00198916	2.78812	Down		32
TC1500007196.hg.1	SLC27A2	solute carrier family 27 member 2	-2.16487	6.44062	-8.53187	4.05285e-05	0.00198916	2.78574	Down		32
TC0500006614.hg.1	ICE1	interactor of little elongation complex ELL subunit 1	-1.81376	5.10324	-8.4931	4.18158e-05	0.00200215	2.75424	Down		32
TC0X00008718.hg.1	MTMR1	myotubularin related protein 1	-2.22031	5.81048	-8.30477	4.87567e-05	0.00209884	2.59919	Down		32
TC0600008348.hg.1	ZNF451	zinc finger protein 451	-1.86564	6.72159	-8.29047	4.93344e-05	0.00210546	2.58728	Down		32
TC0X00008073.hg.1	PRPS1	phosphoribosyl pyrophosphate synthetase 1	-2.16064	8.05349	-8.26781	5.02657e-05	0.00211292	2.56836	Down		32
TC0600012631.hg.1	MMS22L	MMS22 like, DNA repair protein	-2.38926	5.8231	-8.15847	5.50443e-05	0.00217042	2.47635	Down		32
TC0600008863.hg.1	MANEA	mannosidase endo-alpha	-1.67627	6.87399	-7.91436	6.76643e-05	0.00232025	2.26657	Down		32
TC1500009429.hg.1	DMXL2	Dmx like 2	-1.76632	4.86757	-7.88005	6.96847e-05	0.00235421	2.23659	Down		32
TC2000006799.hg.1	DSTN	destrin, actin depolymerizing factor	-2.15024	7.19202	-7.87844	6.97816e-05	0.00235565	2.23517	Down		32
TC1400007440.hg.1	MTHFD1	methylenetetrahydrofolate dehydrogenase, cyclohydrolase and formyltetrahydrofolate synthetase 1	-1.65136	6.86619	-7.7806	7.59341e-05	0.0024374	2.14899	Down		32
TC1700006684.hg.1	MIS12	MIS12 kinetochore complex component	-1.58591	4.62586	-7.76753	7.68013e-05	0.00245335	2.1374	Down		32
TC1400009787.hg.1	SPTLC2	serine palmitoyltransferase long chain base subunit 2	-2.01683	6.92045	-7.74192	7.85324e-05	0.00248008	2.11463	Down		32
TC0300011853.hg.1	SENP7	SUMO specific peptidase 7	-2.42784	5.64622	-7.33921	0.000112389	0.00284161	1.74726	Down		32
TC0300006978.hg.1	CNOT10	CCR4-NOT transcription complex subunit 10	-1.66637	5.86137	-7.22074	0.000125258	0.00296655	1.6357	Down		32
TC0500008582.hg.1	ISOC1	isochorismatase domain containing 1	-1.50361	7.89028	-7.09466	0.000140789	0.00311768	1.5152	Down		32
TC1100011739.hg.1	ALG8	ALG8 alpha-1,3-glucosyltransferase	-1.51715	4.8889	-7.06127	0.000145254	0.00314551	1.48297	Down		32
TC0100018273.hg.1	ATP1A1	ATPase Na+/K+ transporting subunit alpha 1	-1.66646	7.975	-7.0242	0.000150399	0.00320242	1.44703	Down	oncogene, TSG	32
TC1300007208.hg.1	RNASEH2B	ribonuclease H2 subunit B	-1.80963	6.58173	-6.84884	0.000177653	0.00343378	1.2748	Down		32
TC0200010582.hg.1	FASTKD2	FAST kinase domains 2	-1.86504	3.58624	-6.74284	0.000196779	0.00361362	1.16886	Down		32
TC0900009209.hg.1	PMPCA	peptidase, mitochondrial processing subunit alpha	-1.8993	6.48127	-6.57861	0.000231111	0.00394378	1.00194	Down		32
TC0500013153.hg.1	MTRR	5-methyltetrahydrofolate-homocysteine methyltransferase reductase	-2.41274	5.28612	-6.48309	0.000254119	0.00413642	0.903279	Down		32
TC1500009149.hg.1	NDUFAF1	NADH:ubiquinone oxidoreductase complex assembly factor 1	-1.59331	4.96834	-6.42441	0.000269512	0.00425234	0.842085	Down		32
TC0300012527.hg.1	MSL2	MSL complex subunit 2	-1.53383	6.90816	-6.35277	0.000289728	0.0044272	0.766767	Down		32
TC0300013842.hg.1	SLMAP	sarcolemma associated protein	-1.90799	4.48438	-6.11755	0.000368942	0.00508461	0.514666	Down		32
TC1200012707.hg.1	ALDH2	aldehyde dehydrogenase 2 family member	-1.61796	7.83606	-6.04566	0.000397751	0.00529576	0.436119	Down		32
TC0100012055.hg.1	GGPS1	geranylgeranyl diphosphate synthase 1	-1.95025	5.09551	-5.85863	0.000485115	0.00596258	0.228438	Down		32
TC0300011378.hg.1	THOC7	THO complex 7	-1.94883	7.24997	-5.79078	0.000521913	0.00622708	0.151881	Down		32
TC0900007488.hg.1	PIP5K1B	phosphatidylinositol-4-phosphate 5-kinase type 1 beta	-1.60999	6.43933	-5.32386	0.000877212	0.00845916	-0.392874	Down		32
TC0300007437.hg.1	MANF	mesencephalic astrocyte derived neurotrophic factor	-1.90278	5.10956	-5.08902	0.00115167	0.0100475	-0.679007	Down		32
TC0300014021.hg.1	CPOX	coproporphyrinogen oxidase	-2.63608	7.31869	-13.0619	2.00394e-06	0.00174206	5.67189	Down		30
TC0400007559.hg.1	TMEM165	transmembrane protein 165	-2.714	4.29777	-11.5747	4.77093e-06	0.00174206	4.87343	Down		30
TC1700008128.hg.1	NPEPPS	aminopeptidase puromycin sensitive	-2.64373	3.85511	-11.5023	4.98963e-06	0.00174206	4.83131	Down		30
TC0100014284.hg.1	USP24	ubiquitin specific peptidase 24	-2.51208	5.81062	-11.2117	5.98754e-06	0.00174206	4.65916	Down		30
TC0400009217.hg.1	KLHL2	kelch like family member 2	-2.31929	5.0142	-11.1353	6.28592e-06	0.00174206	4.61302	Down		30
TC0700013460.hg.1	METTL2B	methyltransferase like 2B	-2.44514	6.4095	-10.1053	1.24894e-05	0.00174206	3.95255	Down		30
TC0100017229.hg.1	INTS7	integrator complex subunit 7	-2.06361	4.77686	-9.67056	1.70032e-05	0.00174206	3.6506	Down		30
TC1200009959.hg.1	LRP6	LDL receptor related protein 6	-2.34412	4.76153	-9.65202	1.7233e-05	0.00174206	3.6374	Down		30
TC1500009458.hg.1	ARPP19	cAMP regulated phosphoprotein 19	-1.92983	6.90721	-9.40699	2.0622e-05	0.00176109	3.46028	Down		30
TC0200012288.hg.1	HNRNPLL	heterogeneous nuclear ribonucleoprotein L like	-2.18254	6.71855	-9.21314	2.38376e-05	0.00179659	3.31665	Down		30
TC0400011421.hg.1	LAMTOR3	late endosomal/lysosomal adaptor, MAPK and MTOR activator 3	-2.0411	4.65409	-8.90831	3.00991e-05	0.00190475	3.08424	Down		30
TC1600010596.hg.1	DYNC1LI2	dynein cytoplasmic 1 light intermediate chain 2	-1.9962	6.03857	-8.74163	3.42914e-05	0.00193574	2.95368	Down		30
TC1200008835.hg.1	ATP2A2	ATPase sarcoplasmic/endoplasmic reticulum Ca2+ transporting 2	-1.80496	8.24518	-8.55913	3.96503e-05	0.00198764	2.80779	Down		30
TC1800006889.hg.1	RIOK3	RIO kinase 3	-1.75211	7.31692	-8.37452	4.60456e-05	0.00206555	2.65702	Down		30
TC0100009365.hg.1	AHCYL1	adenosylhomocysteinase like 1	-1.6522	9.52662	-8.28715	4.94695e-05	0.00210546	2.58451	Down		30
TC0100009097.hg.1	ABCD3	ATP binding cassette subfamily D member 3	-1.66014	5.58587	-8.25899	5.06333e-05	0.00211966	2.56098	Down		30
TC1300008386.hg.1	MTMR6	myotubularin related protein 6	-1.66861	4.64923	-8.12145	5.67762e-05	0.00219481	2.44493	Down		30
TC0X00006794.hg.1	PRDX4	peroxiredoxin 4	-1.70489	6.53906	-8.03079	6.12812e-05	0.00224881	2.36738	Down		30
TC0200009612.hg.1	EPC2	enhancer of polycomb homolog 2	-1.71218	5.51636	-7.92441	6.70852e-05	0.00230769	2.27532	Down		30
TC1500007671.hg.1	FEM1B	fem-1 homolog B	-1.58029	6.99357	-7.78414	7.57013e-05	0.0024374	2.15212	Down		30
TC0X00009124.hg.1	PIGA	phosphatidylinositol glycan anchor biosynthesis class A	-1.65645	6.45614	-7.74138	7.8569e-05	0.00248008	2.11416	Down		30
TC1300008225.hg.1	PSPC1	paraspeckle component 1	-1.93586	5.88513	-7.67214	8.34749e-05	0.00252707	2.05225	Down		30
TC0500009521.hg.1	CPEB4	cytoplasmic polyadenylation element binding protein 4	-1.70087	5.73137	-7.66492	8.40055e-05	0.00253078	2.04577	Down		30
TC1000010737.hg.1	RHOBTB1	Rho related BTB domain containing 1	-1.73663	4.27929	-7.6595	8.44067e-05	0.00253335	2.0409	Down		30
TC0X00006770.hg.1	SMS	spermine synthase	-1.56338	8.91	-7.63837	8.59908e-05	0.00255107	2.02187	Down		30
TC0600014142.hg.1	PTP4A1	protein tyrosine phosphatase 4A1	-1.52471	9.13124	-7.58239	9.03503e-05	0.00259582	1.97125	Down		30
TC1000008315.hg.1	BMPR1A	bone morphogenetic protein receptor type 1A	-1.69054	5.39844	-7.50866	9.64753e-05	0.00267102	1.90403	Down	oncogene, TSG	30
TC1400008963.hg.1	MBIP	MAP3K12 binding inhibitory protein 1	-1.6619	7.17958	-7.48143	9.88528e-05	0.0026953	1.87906	Down		30
TC0800012300.hg.1	FNTA	farnesyltransferase, CAAX box, alpha	-2.02243	4.9562	-7.44458	0.000102177	0.0027364	1.84512	Down		30
TC0500008304.hg.1	SLC25A46	solute carrier family 25 member 46	-1.9695	6.07745	-7.40933	0.000105473	0.00277496	1.81252	Down		30
TC0700007132.hg.1	FKBP9	FKBP prolyl isomerase 9	-1.81636	7.60584	-7.40699	0.000105695	0.00277496	1.81036	Down		30
TC0100017730.hg.1	EGLN1	egl-9 family hypoxia inducible factor 1	-1.9712	6.77177	-7.38659	0.000107662	0.00279511	1.79142	Down		30
TC0X00007267.hg.1	MAGED1	MAGE family member D1	-1.84579	4.85287	-7.21661	0.000125735	0.00297299	1.63179	Down		30
TC2000008883.hg.1	CDK5RAP1	CDK5 regulatory subunit associated protein 1	-1.65908	6.51108	-7.20711	0.000126841	0.00297767	1.62277	Down		30
TC0800012299.hg.1	HOOK3	hook microtubule tethering protein 3	-1.78846	5.96413	-7.06733	0.000144433	0.00314044	1.48883	Down		30
TC0700009700.hg.1	NUB1	negative regulator of ubiquitin like proteins 1	-1.71556	7.66167	-7.00057	0.000153783	0.0032288	1.42404	Down		30
TC0400007572.hg.1	EXOC1	exocyst complex component 1	-2.30753	6.32974	-6.88609	0.000171433	0.00338639	1.31169	Down		30
TC0100007552.hg.1	SESN2	sestrin 2	-1.72182	7.69574	-6.81961	0.000182712	0.00348042	1.24573	Down		30
TC2000006631.hg.1	CRLS1	cardiolipin synthase 1	-2.15601	6.08942	-6.7267	0.000199888	0.00364295	1.15261	Down		30
TC0X00009427.hg.1	BCOR	BCL6 corepressor	-1.61249	7.63669	-6.71391	0.000202389	0.00364704	1.13971	Down	TSG, fusion	30
TC0600012654.hg.1	COQ3	coenzyme Q3, methyltransferase	-1.60853	4.05388	-6.70486	0.000204182	0.0036643	1.13056	Down		30
TC1500007060.hg.1	MAP1A	microtubule associated protein 1A	-1.6547	4.32178	-6.47643	0.000255814	0.00415155	0.896365	Down		30
TC0200009239.hg.1	UGGT1	UDP-glucose glycoprotein glucosyltransferase 1	-2.0237	5.88261	-6.42109	0.000270413	0.0042567	0.838613	Down		30
TC0100010381.hg.1	UAP1	UDP-N-acetylglucosamine pyrophosphorylase 1	-2.027	8.12078	-6.12887	0.000364624	0.00505849	0.52696	Down		30
TC0100008496.hg.1	FGGY	FGGY carbohydrate kinase domain containing	-2.18414	3.63527	-6.06471	0.000389883	0.00523365	0.456997	Down		30
TC0800012290.hg.1	UBXN8	UBX domain protein 8	-1.5693	5.13856	-5.49648	0.000721576	0.0075701	-0.187779	Down		30
TC0200014719.hg.1	BAZ2B	bromodomain adjacent to zinc finger domain 2B	-1.86746	5.35649	-5.28923	0.000912705	0.0086872	-0.434548	Down		30
TC1200011870.hg.1	KCTD10	potassium channel tetramerization domain containing 10	-1.91228	4.23902	-5.01077	0.00126317	0.0106999	-0.776197	Down		30
TC1100013096.hg.1	RBM7	RNA binding motif protein 7	-1.5099	6.2911	-4.80145	0.00162431	0.0125026	-1.04073	Down		30
TC0100017267.hg.1	ANGEL2	angel homolog 2	-2.10985	4.75145	-4.79204	0.00164303	0.0125775	-1.05278	Down		30
TC1500007926.hg.1	RCN2	reticulocalbin 2	-2.92456	6.77986	-12.4161	2.88659e-06	0.00174206	5.33996	Down		28
TC1500009669.hg.1	VPS13C	vacuolar protein sorting 13 homolog C	-2.77748	3.82965	-10.739	8.12969e-06	0.00174206	4.36754	Down		28
TC0400008213.hg.1	RAP1GDS1	Rap1 GTPase-GDP dissociation stimulator 1	-1.99485	4.49872	-9.99376	1.35033e-05	0.00174206	3.87644	Down	oncogene, fusion	28
TC0700008755.hg.1	DUS4L	dihydrouridine synthase 4 like	-2.24261	4.26082	-9.84613	1.49901e-05	0.00174206	3.77429	Down		28
TC0500007912.hg.1	ZFYVE16	zinc finger FYVE-type containing 16	-2.38342	4.5572	-9.65765	1.71628e-05	0.00174206	3.64141	Down		28
TC1300008633.hg.1	SUPT20H	SPT20 homolog, SAGA complex component	-1.90851	7.62639	-9.54522	1.86265e-05	0.00174206	3.5608	Down		28
TC1200007146.hg.1	STK38L	serine/threonine kinase 38 like	-1.94577	4.51498	-8.99237	2.82053e-05	0.00188708	3.14915	Down		28
TC0400012780.hg.1	PI4K2B	phosphatidylinositol 4-kinase type 2 beta	-2.38414	5.94937	-8.96848	2.87294e-05	0.00188708	3.13077	Down		28
TC2100007949.hg.1	MIS18A	MIS18 kinetochore protein A	-2.24154	7.08244	-8.7041	3.53234e-05	0.00193732	2.92393	Down		28
TC1400010592.hg.1	NUBPL	nucleotide binding protein like	-1.99775	3.64372	-8.67636	3.61088e-05	0.00195402	2.90186	Down		28
TC0300009690.hg.1	EIF2B5	eukaryotic translation initiation factor 2B subunit epsilon	-1.69727	4.84723	-8.592	3.86193e-05	0.00198014	2.8343	Down		28
TC0600012839.hg.1	CDK19	cyclin dependent kinase 19	-1.831	4.46734	-8.57415	3.91754e-05	0.00198378	2.81992	Down		28
TC0700013441.hg.1	IFRD1	interferon related developmental regulator 1	-1.96037	6.74535	-8.49454	4.17672e-05	0.00200215	2.75541	Down		28
TC0500011602.hg.1	GIN1	gypsy retrotransposon integrase 1	-2.12675	3.89331	-8.42708	4.41142e-05	0.00203801	2.70028	Down		28
TC0800008770.hg.1	RNF139	ring finger protein 139	-1.89091	6.09163	-8.20869	5.27889e-05	0.00213576	2.51876	Down		28
TC1200012876.hg.1	CHFR	checkpoint with forkhead and ring finger domains	-1.69468	4.48179	-8.16998	5.45181e-05	0.00216193	2.48609	Down		28
TC1000011606.hg.1	BLOC1S2	biogenesis of lysosomal organelles complex 1 subunit 2	-1.62961	5.78732	-8.13518	5.61271e-05	0.00218047	2.45659	Down		28
TC1600011047.hg.1	HSDL1	hydroxysteroid dehydrogenase like 1	-1.65465	6.11535	-8.06725	5.94228e-05	0.00223526	2.39867	Down		28
TC0100009561.hg.1	TTF2	transcription termination factor 2	-1.58419	4.8971	-8.05505	6.00377e-05	0.00224471	2.38821	Down		28
TC0400011578.hg.1	CASP6	caspase 6	-1.64119	5.35614	-7.93074	6.6723e-05	0.00230671	2.28083	Down		28
TC1100012488.hg.1	IFT46	intraflagellar transport 46	-1.90488	5.65865	-7.81148	7.39289e-05	0.00241511	2.1763	Down		28
TC0700010352.hg.1	ANKMY2	ankyrin repeat and MYND domain containing 2	-1.7314	6.51934	-7.70409	8.11695e-05	0.00251875	2.08088	Down		28
TC0500007179.hg.1	WDR70	WD repeat domain 70	-1.93555	5.23475	-7.66684	8.38637e-05	0.00252826	2.0475	Down		28
TC0300010544.hg.1	NGLY1	N-glycanase 1	-2.41038	5.64364	-7.60493	8.85659e-05	0.00257207	1.99167	Down		28
TC0200016646.hg.1	MEMO1	mediator of cell motility 1	-1.61357	5.59039	-7.58922	8.98057e-05	0.00258443	1.97744	Down		28
TC0200008291.hg.1	KDM3A	lysine demethylase 3A	-2.29434	5.92059	-7.51558	9.58807e-05	0.00266475	1.91037	Down		28
TC0100016694.hg.1	IVNS1ABP	influenza virus NS1A binding protein	-1.84809	5.90262	-7.32987	0.000113349	0.00285589	1.73852	Down		28
TC0400008547.hg.1	METTL14	methyltransferase like 14	-2.03767	5.24067	-7.21495	0.000125927	0.00297592	1.63021	Down		28
TC1900011708.hg.1	PDCD2L	programmed cell death 2 like	-1.71779	6.7428	-7.00217	0.000153551	0.0032288	1.42561	Down		28
TC0900008959.hg.1	FUBP3	far upstream element binding protein 3	-1.95713	6.58648	-6.98426	0.000156169	0.00325786	1.40813	Down		28
TC1200010341.hg.1	PKP2	plakophilin 2	-1.72379	7.44607	-6.8648	0.000174958	0.00340503	1.29063	Down		28
TC0300012393.hg.1	MBD4	methyl-CpG binding domain 4, DNA glycosylase	-1.88153	6.35724	-6.79538	0.000187027	0.0035209	1.22154	Down		28
TC0300009310.hg.1	MLF1	myeloid leukemia factor 1	-1.55812	6.49491	-6.71353	0.000202464	0.00364704	1.13932	Down	TSG, fusion	28
TC0800010944.hg.1	IMPA1	inositol monophosphatase 1	-1.76954	5.1652	-6.71114	0.000202937	0.0036495	1.1369	Down		28
TC1800007431.hg.1	MALT1	MALT1 paracaspase	-1.60932	3.84074	-6.67719	0.000209769	0.00373357	1.10255	Down	oncogene, fusion	28
TC1100007139.hg.1	METTL15	methyltransferase like 15	-1.84511	6.20823	-6.42285	0.000269935	0.00425351	0.840454	Down		28
TC0200016585.hg.1	MOB4	MOB family member 4, phocein	-2.54633	5.48553	-6.38223	0.000281218	0.00436039	0.79782	Down		28
TC1000007861.hg.1	TET1	tet methylcytosine dioxygenase 1	-1.62061	6.40845	-6.30999	0.000302604	0.00453613	0.721461	Down	oncogene, TSG, fusion	28
TC1900012050.hg.1	PPP6R1	protein phosphatase 6 regulatory subunit 1	-1.53019	6.46072	-6.2938	0.00030764	0.00457985	0.704256	Down		28
TC1600009247.hg.1	GLYR1	glyoxylate reductase 1 homolog	-1.66409	6.58456	-6.06826	0.000388435	0.00522438	0.460887	Down		28
TC0X00007668.hg.1	UPRT	uracil phosphoribosyltransferase homolog	-1.5266	4.63992	-6.06764	0.000388687	0.00522566	0.460208	Down		28
TC1000012162.hg.1	UROS	uroporphyrinogen III synthase	-1.9296	5.84702	-5.71629	0.000565911	0.00653305	0.0670839	Down		28
TC0200009955.hg.1	CYBRD1	cytochrome b reductase 1	-1.99586	6.23511	-5.44411	0.000765307	0.00781178	-0.249545	Down		28
TC0900011533.hg.1	MAPKAP1	MAPK associated protein 1	-2.16439	5.73969	-5.35055	0.000850897	0.00827861	-0.360879	Down		28
TC1100007185.hg.1	ELP4	elongator acetyltransferase complex subunit 4	-1.5001	6.35895	-5.28756	0.000914464	0.00869251	-0.436571	Down		28
TC2000009053.hg.1	TTI1	TELO2 interacting protein 1	-1.54969	6.48977	-5.09975	0.00113725	0.00996573	-0.665757	Down		28
TC0800011172.hg.1	MTERF3	mitochondrial transcription termination factor 3	-1.6036	5.09459	-4.83311	0.00156306	0.0121998	-1.00028	Down		28
TC0600007196.hg.1	MRS2	magnesium transporter MRS2	-2.29222	4.57904	-10.0345	1.31224e-05	0.00174206	3.90437	Down		26
TC1400009190.hg.1	GNPNAT1	glucosamine-phosphate N-acetyltransferase 1	-2.2655	5.79812	-9.8502	1.49467e-05	0.00174206	3.77713	Down		26
TC0100014505.hg.1	SLC35D1	solute carrier family 35 member D1	-2.28545	4.04611	-9.81314	1.53469e-05	0.00174206	3.75124	Down		26
TC1700011313.hg.1	USP32	ubiquitin specific peptidase 32	-2.00605	5.43257	-9.77421	1.57805e-05	0.00174206	3.72392	Down		26
TC1300007164.hg.1	SETDB2	SET domain bifurcated histone lysine methyltransferase 2	-2.01354	3.19876	-9.62316	1.75976e-05	0.00174206	3.61679	Down		26
TC0500010717.hg.1	MOCS2	molybdenum cofactor synthesis 2	-1.89479	6.43413	-9.59957	1.79021e-05	0.00174206	3.5999	Down		26
TC0100009054.hg.1	MTF2	metal response element binding transcription factor 2	-2.13035	6.53581	-9.55064	1.85529e-05	0.00174206	3.56471	Down		26
TC0100017548.hg.1	CDC42BPA	CDC42 binding protein kinase alpha	-2.25258	5.34487	-9.36584	2.12616e-05	0.00176109	3.43006	Down		26
TC0900006970.hg.1	NFX1	nuclear transcription factor, X-box binding 1	-2.69582	5.56555	-9.36452	2.12825e-05	0.00176109	3.42908	Down		26
TC0200010643.hg.1	RPE	ribulose-5-phosphate-3-epimerase	-1.9824	6.22274	-9.22355	2.36513e-05	0.00179443	3.32444	Down		26
TC1500008545.hg.1	ASB7	ankyrin repeat and SOCS box containing 7	-2.22835	4.97307	-8.98308	2.84078e-05	0.00188708	3.14201	Down		26
TC1100013176.hg.1	HNRNPUL2	heterogeneous nuclear ribonucleoprotein U like 2	-2.36668	6.89588	-8.76038	3.37885e-05	0.00193513	2.9685	Down		26
TC0100013226.hg.1	USP48	ubiquitin specific peptidase 48	-1.84235	7.73202	-8.70936	3.51767e-05	0.00193732	2.92811	Down		26
TC0900008742.hg.1	ARPC5L	actin related protein 2/3 complex subunit 5 like	-2.10746	5.56975	-8.6959	3.55535e-05	0.00194145	2.91742	Down		26
TC1200008597.hg.1	GAS2L3	growth arrest specific 2 like 3	-1.99234	4.41958	-8.66212	3.65192e-05	0.00196696	2.89051	Down		26
TC1100013097.hg.1	REXO2	RNA exonuclease 2	-2.25755	7.50833	-8.64563	3.70014e-05	0.00197512	2.87733	Down		26
TC0800012312.hg.1	SGK3	serum/glucocorticoid regulated kinase family member 3	-1.93857	4.88363	-8.52823	4.06476e-05	0.00198939	2.78278	Down		26
TC1200007406.hg.1	IRAK4	interleukin 1 receptor associated kinase 4	-1.86926	4.79967	-8.49491	4.17546e-05	0.00200215	2.75571	Down		26
TC0100011267.hg.1	ATP2B4	ATPase plasma membrane Ca2+ transporting 4	-1.66576	5.81943	-8.44412	4.35076e-05	0.00203801	2.71425	Down		26
TC0900010462.hg.1	RFK	riboflavin kinase	-1.65677	8.06874	-8.42536	4.41761e-05	0.00203801	2.69886	Down		26
TC0200007077.hg.1	SLC4A1AP	solute carrier family 4 member 1 adaptor protein	-1.84734	7.25925	-8.39259	4.53712e-05	0.00206107	2.67192	Down		26
TC0400011253.hg.1	KLHL8	kelch like family member 8	-1.72038	5.54372	-8.35394	4.68277e-05	0.0020842	2.64	Down		26
TC0200010907.hg.1	ACSL3	acyl-CoA synthetase long chain family member 3	-1.965	8.00447	-8.22337	5.21494e-05	0.00213526	2.53111	Down		26
TC0200011688.hg.1	ADAM17	ADAM metallopeptidase domain 17	-1.71026	5.45252	-8.21974	5.23067e-05	0.00213526	2.52806	Down		26
TC0100017100.hg.1	EIF2D	eukaryotic translation initiation factor 2D	-2.21859	7.77473	-8.06049	5.97627e-05	0.00224431	2.39288	Down		26
TC1300007484.hg.1	PIBF1	progesterone immunomodulatory binding factor 1	-1.65961	4.05855	-8.03161	6.12387e-05	0.00224881	2.36809	Down		26
TC1100008651.hg.1	TMEM126B	transmembrane protein 126B	-1.76804	6.44665	-7.99843	6.29849e-05	0.00227246	2.3395	Down		26
TC0700007121.hg.1	AVL9	AVL9 cell migration associated	-1.56304	5.69413	-7.94001	6.61968e-05	0.00230048	2.28889	Down		26
TC1000012584.hg.1	ERLIN1	ER lipid raft associated 1	-1.62652	5.48584	-7.88635	6.9309e-05	0.00235066	2.2421	Down		26
TC0100009191.hg.1	AGL	amylo-alpha-1, 6-glucosidase, 4-alpha-glucanotransferase	-2.31519	4.37259	-7.88329	6.94911e-05	0.0023523	2.23943	Down		26
TC1000011798.hg.1	XPNPEP1	X-prolyl aminopeptidase 1	-1.59659	7.56801	-7.8396	7.21547e-05	0.00239635	2.20108	Down		26
TC0100014966.hg.1	GCLM	glutamate-cysteine ligase modifier subunit	-1.53919	5.85096	-7.82895	7.28207e-05	0.00240575	2.19171	Down		26
TC0200015329.hg.1	GTF3C3	general transcription factor IIIC subunit 3	-2.28236	5.02687	-7.80737	7.41923e-05	0.00241511	2.17267	Down		26
TC0400012252.hg.1	PPID	peptidylprolyl isomerase D	-1.70411	7.28071	-7.79757	7.48245e-05	0.0024259	2.16402	Down		26
TC0400010580.hg.1	GNPDA2	glucosamine-6-phosphate deaminase 2	-1.61641	4.84492	-7.60548	8.85227e-05	0.00257207	1.99217	Down		26
TC0600014241.hg.1	TBC1D7	TBC1 domain family member 7	-1.51153	6.67298	-7.59983	8.89662e-05	0.00257652	1.98706	Down		26
TC1200008373.hg.1	TMTC3	transmembrane O-mannosyltransferase targeting cadherins 3	-1.84214	4.93281	-7.57401	9.10246e-05	0.0025963	1.96363	Down		26
TC0500010932.hg.1	SGTB	small glutamine rich tetratricopeptide repeat co-chaperone beta	-1.83491	5.73686	-7.44561	0.000102082	0.0027364	1.84608	Down		26
TC1200009076.hg.1	SUDS3	SDS3 homolog, SIN3A corepressor complex component	-1.59675	4.59933	-7.30831	0.000115597	0.00287929	1.71832	Down		26
TC1000008447.hg.1	TNKS2	tankyrase 2	-1.7346	5.21914	-7.27974	0.000118655	0.00290609	1.69146	Down		26
TC1400009134.hg.1	SAV1	salvador family WW domain containing protein 1	-2.10319	5.10508	-7.27776	0.000118869	0.00290609	1.6896	Down		26
TC0500008782.hg.1	KDM3B	lysine demethylase 3B	-1.51074	7.51945	-7.2022	0.000127416	0.00298509	1.61811	Down		26
TC0900010995.hg.1	ALG2	ALG2 alpha-1,3/1,6-mannosyltransferase	-1.57322	5.45175	-6.91818	0.000166267	0.00333548	1.34335	Down		26
TC1100008955.hg.1	AASDHPPT	aminoadipate-semialdehyde dehydrogenase-phosphopantetheinyl transferase	-2.05823	5.89416	-6.74708	0.000195972	0.00360873	1.17312	Down		26
TC0700011054.hg.1	GRB10	growth factor receptor bound protein 10	-1.69217	6.60183	-6.72403	0.000200407	0.00364704	1.14992	Down		26
TC1100009287.hg.1	ARHGEF12	Rho guanine nucleotide exchange factor 12	-1.57858	6.90161	-6.63866	0.000217838	0.00381783	1.06337	Down	TSG, fusion	26
TC1500009395.hg.1	TRPM7	transient receptor potential cation channel subfamily M member 7	-2.00779	3.55662	-6.61746	0.000222423	0.00386079	1.04174	Down		26
TC0300013058.hg.1	GOLIM4	golgi integral membrane protein 4	-1.92329	6.99838	-6.5482	0.000238172	0.00399827	0.970666	Down		26
TC0600014148.hg.1	CYB5R4	cytochrome b5 reductase 4	-1.6696	5.75339	-6.51021	0.000247338	0.00406875	0.93141	Down		26
TC1200011711.hg.1	GNPTAB	N-acetylglucosamine-1-phosphate transferase subunits alpha and beta	-1.9792	4.88682	-6.15887	0.000353438	0.00496309	0.559491	Down		26
TC0200009806.hg.1	TANK	TRAF family member associated NFKB activator	-1.91322	5.82142	-6.12981	0.000364266	0.00505849	0.527985	Down		26
TC1400009198.hg.1	DDHD1	DDHD domain containing 1	-2.39115	4.23806	-6.05649	0.000393256	0.00525546	0.447997	Down		26
TC1800008285.hg.1	NPC1	NPC intracellular cholesterol transporter 1	-1.97794	6.05164	-6.0443	0.000398319	0.00530054	0.434628	Down		26
TC0100017505.hg.1	SDE2	SDE2 telomere maintenance homolog	-1.53849	7.7296	-5.9576	0.000436498	0.00557659	0.338935	Down		26
TC1500010655.hg.1	CHSY1	chondroitin sulfate synthase 1	-1.5682	6.39993	-5.7306	0.000557146	0.00647053	0.0834414	Down		26
TC1200008669.hg.1	TDG	thymine DNA glycosylase	-1.75755	5.18725	-5.32506	0.000876007	0.00845469	-0.39143	Down		26
TC0200012073.hg.1	GTF3C2	general transcription factor IIIC subunit 2	-1.51923	5.97349	-5.19118	0.0010221	0.00932568	-0.553526	Down		26
TC0300011651.hg.1	GBE1	1,4-alpha-glucan branching enzyme 1	-3.3062	4.43126	-13.266	1.79183e-06	0.00174206	5.77241	Down		24
TC0X00010097.hg.1	RLIM	ring finger protein, LIM domain interacting	-2.15305	5.35356	-10.9134	7.25188e-06	0.00174206	4.4769	Down		24
TC1500007910.hg.1	UBE2Q2	ubiquitin conjugating enzyme E2 Q2	-2.17816	4.9809	-10.8465	7.57537e-06	0.00174206	4.43519	Down		24
TC0600012372.hg.1	LCA5	lebercilin LCA5	-2.73479	4.00363	-10.6067	8.87526e-06	0.00174206	4.28325	Down		24
TC1700008531.hg.1	METTL2A	methyltransferase like 2A	-2.0585	6.09714	-10.4665	9.75054e-06	0.00174206	4.1926	Down		24
TC2100008506.hg.1	MORC3	MORC family CW-type zinc finger 3	-2.29827	6.77844	-10.3861	1.02966e-05	0.00174206	4.13994	Down		24
TC1100013163.hg.1	APIP	APAF1 interacting protein	-2.26178	6.26326	-10.2561	1.12528e-05	0.00174206	4.0539	Down		24
TC1100007227.hg.1	HIPK3	homeodomain interacting protein kinase 3	-2.26085	5.41944	-10.1844	1.18227e-05	0.00174206	4.00592	Down		24
TC1300007884.hg.1	TPP2	tripeptidyl peptidase 2	-1.98776	5.07844	-10.087	1.26499e-05	0.00174206	3.94011	Down		24
TC0500010788.hg.1	IL6ST	interleukin 6 cytokine family signal transducer	-2.32228	5.13399	-9.4841	1.94807e-05	0.00174206	3.51655	Down	oncogene	24
TC1200006604.hg.1	CD9	CD9 molecule	-1.86402	5.39259	-9.45877	1.98477e-05	0.00174206	3.49812	Down		24
TC0200016591.hg.1	BZW1	basic leucine zipper and W2 domains 1	-2.42483	6.03805	-9.27144	2.28149e-05	0.00178211	3.36018	Down		24
TC0200009049.hg.1	INSIG2	insulin induced gene 2	-2.02651	5.19364	-9.21683	2.37714e-05	0.00179472	3.31941	Down		24
TC0500012642.hg.1	RNF145	ring finger protein 145	-2.46684	4.4796	-9.10849	2.58053e-05	0.0018291	3.23778	Down		24
TC0300009897.hg.1	OPA1	OPA1 mitochondrial dynamin like GTPase	-2.19604	7.2104	-8.9557	2.90145e-05	0.00188708	3.12091	Down		24
TC0200008300.hg.1	RMND5A	required for meiotic nuclear division 5 homolog A	-2.97574	5.98539	-8.8889	3.05563e-05	0.00191291	3.06917	Down		24
TC0100012593.hg.1	WRAP73	WD repeat containing, antisense to TP73	-1.99095	3.94101	-8.8191	3.22665e-05	0.00191652	3.01468	Down		24
TC1900010360.hg.1	ANKRD27	ankyrin repeat domain 27	-1.83399	5.70652	-8.70235	3.53726e-05	0.00193732	2.92254	Down		24
TC1700010274.hg.1	BLMH	bleomycin hydrolase	-2.15275	6.31858	-8.50424	4.14414e-05	0.00200215	2.7633	Down		24
TC0X00010921.hg.1	MMGT1	membrane magnesium transporter 1	-1.82406	7.38618	-8.48807	4.1986e-05	0.00200215	2.75014	Down		24
TC0100013305.hg.1	FUCA1	alpha-L-fucosidase 1	-1.75196	5.33236	-8.2101	5.27273e-05	0.00213526	2.51994	Down		24
TC0500012354.hg.1	YIPF5	Yip1 domain family member 5	-1.70949	6.88696	-8.11672	5.70017e-05	0.00219578	2.44091	Down		24
TC1400006851.hg.1	ARHGAP5	Rho GTPase activating protein 5	-1.86424	4.58603	-8.09393	5.81032e-05	0.00221261	2.42148	Down	oncogene	24
TC1300009293.hg.1	MYCBP2	MYC binding protein 2	-2.15555	4.62745	-7.97363	6.43261e-05	0.00227913	2.31807	Down		24
TC0200016418.hg.1	ZNF512	zinc finger protein 512	-1.65782	5.79754	-7.8954	6.87725e-05	0.00234451	2.25002	Down		24
TC1200006450.hg.1	WNK1	WNK lysine deficient protein kinase 1	-2.04645	6.18994	-7.80827	7.41344e-05	0.00241511	2.17347	Down		24
TC0900007865.hg.1	SECISBP2	SECIS binding protein 2	-2.03817	5.62271	-7.73375	7.90936e-05	0.00248918	2.10736	Down		24
TC0500007465.hg.1	GPBP1	GC-rich promoter binding protein 1	-1.5288	6.71389	-7.69209	8.20267e-05	0.00252707	2.07015	Down		24
TC1100010451.hg.1	IMMP1L	inner mitochondrial membrane peptidase subunit 1	-1.62394	4.08997	-7.68175	8.27735e-05	0.00252707	2.06088	Down		24
TC0100017666.hg.1	ABCB10	ATP binding cassette subfamily B member 10	-2.52655	6.58265	-7.64386	8.55759e-05	0.00254977	2.02682	Down		24
TC1100009306.hg.1	SC5D	sterol-C5-desaturase	-2.39114	4.62317	-7.57922	9.06049e-05	0.0025963	1.96837	Down		24
TC0300008477.hg.1	TIMMDC1	translocase of inner mitochondrial membrane domain containing 1	-1.86952	5.86661	-7.21038	0.000126458	0.00297767	1.62588	Down		24
TC0400012126.hg.1	GATB	glutamyl-tRNA amidotransferase subunit B	-1.55022	6.10569	-7.10041	0.000140036	0.00310597	1.52074	Down		24
TC1100012208.hg.1	CWF19L2	CWF19 like cell cycle control factor 2	-1.5229	5.12502	-7.07926	0.000142829	0.00313313	1.50036	Down		24
TC0300009738.hg.1	SENP2	SUMO specific peptidase 2	-1.9016	6.61185	-7.00385	0.000153308	0.0032288	1.42724	Down		24
TC0200009539.hg.1	ARHGAP15	Rho GTPase activating protein 15	-2.07206	5.87868	-6.9949	0.000154607	0.00323461	1.41852	Down		24
TC0400012452.hg.1	FBXO8	F-box protein 8	-2.17083	5.982	-6.96736	0.000158685	0.00327571	1.39162	Down		24
TC1900009970.hg.1	BST2	bone marrow stromal cell antigen 2	-2.45386	6.17487	-6.93486	0.000163652	0.00331886	1.35975	Down		24
TC1700012141.hg.1	WDR45B	WD repeat domain 45B	-1.76185	7.41358	-6.91981	0.00016601	0.00333495	1.34495	Down		24
TC1300008424.hg.1	USP12	ubiquitin specific peptidase 12	-1.68266	5.54454	-6.7871	0.000188528	0.00353689	1.21326	Down		24
TC0100011549.hg.1	FLVCR1	FLVCR heme transporter 1	-2.29655	3.99449	-6.76935	0.000191789	0.00358413	1.19549	Down		24
TC0900009437.hg.1	AK3	adenylate kinase 3	-1.76766	8.1458	-6.74867	0.000195668	0.00360723	1.17473	Down		24
TC2100006787.hg.1	GABPA	GA binding protein transcription factor subunit alpha	-1.94951	4.78353	-6.71543	0.00020209	0.00364704	1.14124	Down		24
TC0400012381.hg.1	NEK1	NIMA related kinase 1	-1.66134	6.41603	-6.71154	0.000202857	0.0036495	1.13731	Down		24
TC1300007592.hg.1	NDFIP2	Nedd4 family interacting protein 2	-1.5721	5.74125	-6.70382	0.000204388	0.00366648	1.12951	Down		24
TC1700007779.hg.1	MSL1	MSL complex subunit 1	-1.70639	5.35126	-6.61126	0.000223786	0.00387572	1.0354	Down		24
TC0400011920.hg.1	SLC7A11	solute carrier family 7 member 11	-1.71066	5.12527	-6.59477	0.000227452	0.00391192	1.01852	Down		24
TC0200007411.hg.1	PPM1B	protein phosphatase, Mg2+/Mn2+ dependent 1B	-1.99035	6.63172	-6.47002	0.000257459	0.0041612	0.889696	Down		24
TC0X00006671.hg.1	MOSPD2	motile sperm domain containing 2	-1.93305	5.07279	-6.46394	0.00025903	0.0041741	0.883366	Down		24
TC0200006951.hg.1	UBXN2A	UBX domain protein 2A	-2.00577	5.79231	-6.45993	0.000260074	0.00418782	0.879181	Down		24
TC1200007767.hg.1	NCKAP1L	NCK associated protein 1 like	-1.66287	5.97555	-6.37733	0.000282612	0.00436929	0.79267	Down		24
TC1800008123.hg.1	CEP76	centrosomal protein 76	-1.70604	3.51514	-6.26558	0.000316645	0.00466288	0.67418	Down		24
TC1400010641.hg.1	UBR7	ubiquitin protein ligase E3 component n-recognin 7	-1.52742	5.67191	-6.23557	0.000326543	0.0047411	0.642076	Down		24
TC1000009841.hg.1	PHYH	phytanoyl-CoA 2-hydroxylase	-1.55337	6.25412	-6.16751	0.000350289	0.00493773	0.568833	Down		24
TC1200011474.hg.1	ATP2B1	ATPase plasma membrane Ca2+ transporting 1	-2.51575	5.28194	-6.16407	0.000351539	0.00494523	0.565116	Down		24
TC0500010540.hg.1	LIFR	LIF receptor subunit alpha	-2.8211	3.70585	-5.99635	0.000418954	0.00545724	0.381834	Down		24
TC0100008271.hg.1	RNF11	ring finger protein 11	-1.75339	7.094	-5.83718	0.000496429	0.00605156	0.204303	Down		24
TC1200012599.hg.1	AEBP2	AE binding protein 2	-1.78792	6.14095	-5.76012	0.000539544	0.00635622	0.117079	Down		24
TC0600007869.hg.1	CMTR1	cap methyltransferase 1	-1.53408	6.15792	-5.53813	0.000688775	0.00734589	-0.138955	Down		24
TC0800012432.hg.1	MRPS28	mitochondrial ribosomal protein S28	-1.96378	4.4036	-5.49565	0.000722248	0.00757531	-0.188756	Down		24
TC1400009315.hg.1	TIMM9	translocase of inner mitochondrial membrane 9	-1.8477	4.85574	-4.91181	0.00142152	0.0115047	-0.900426	Down		24
TC0200011034.hg.1	CAB39	calcium binding protein 39	-2.62029	5.54433	-12.5351	2.69534e-06	0.00174206	5.40277	Down		22
TC0100007439.hg.1	PDIK1L	PDLIM1 interacting kinase 1 like	-2.52408	6.0952	-11.657	4.53569e-06	0.00174206	4.92085	Down		22
TC0600012123.hg.1	DST	dystonin	-2.40146	4.17178	-11.6148	4.65458e-06	0.00174206	4.8966	Down		22
TC1800006487.hg.1	SMCHD1	structural maintenance of chromosomes flexible hinge domain containing 1	-2.57918	6.25931	-11.5989	4.70055e-06	0.00174206	4.88738	Down		22
TC2000008295.hg.1	GPCPD1	glycerophosphocholine phosphodiesterase 1	-2.3637	4.04438	-9.9484	1.39417e-05	0.00174206	3.84524	Down		22
TC0600014337.hg.1	GOPC	golgi associated PDZ and coiled-coil motif containing	-2.03225	3.52054	-9.52433	1.89137e-05	0.00174206	3.54571	Down		22
TC1000012066.hg.1	NSMCE4A	NSE4 homolog A, SMC5-SMC6 complex component	-1.93681	4.24898	-9.50197	1.92266e-05	0.00174206	3.52952	Down		22
TC1300008292.hg.1	MICU2	mitochondrial calcium uptake 2	-1.9328	3.13825	-9.43789	2.01559e-05	0.00174206	3.48289	Down		22
TC1200012698.hg.1	CHPT1	choline phosphotransferase 1	-2.01127	6.87761	-9.33546	2.1748e-05	0.00176109	3.40765	Down		22
TC0500008568.hg.1	SLC12A2	solute carrier family 12 member 2	-2.5187	3.41945	-9.02694	2.74655e-05	0.00187856	3.17566	Down		22
TC0500013395.hg.1	NUDCD2	NudC domain containing 2	-1.96018	5.14739	-8.90519	3.01719e-05	0.00190658	3.08183	Down		22
TC0100008641.hg.1	MIER1	MIER1 transcriptional regulator	-2.24294	5.69318	-8.82428	3.21359e-05	0.00191652	3.01874	Down		22
TC0500008232.hg.1	PPIP5K2	diphosphoinositol pentakisphosphate kinase 2	-2.72829	6.83204	-8.53563	4.04062e-05	0.00198916	2.78878	Down		22
TC2200008350.hg.1	PITPNB	phosphatidylinositol transfer protein beta	-2.4712	6.37258	-8.51461	4.1096e-05	0.00200215	2.77173	Down		22
TC1500009639.hg.1	ICE2	interactor of little elongation complex ELL subunit 2	-2.42178	4.46049	-8.48746	4.20068e-05	0.00200215	2.74964	Down		22
TC0300008824.hg.1	ATP2C1	ATPase secretory pathway Ca2+ transporting 1	-2.15444	6.12964	-8.1381	5.59902e-05	0.00217995	2.45907	Down		22
TC0800007351.hg.1	TACC1	transforming acidic coiled-coil containing protein 1	-1.55954	5.70443	-7.76579	7.69176e-05	0.00245345	2.13585	Down		22
TC1100011128.hg.1	ATL3	atlastin GTPase 3	-1.67062	6.47631	-7.61006	8.81651e-05	0.00257207	1.99632	Down		22
TC0200010696.hg.1	SPAG16	sperm associated antigen 16	-2.02016	3.94179	-7.58885	8.98347e-05	0.00258443	1.97711	Down		22
TC0800010016.hg.1	SARAF	store-operated calcium entry associated regulatory factor	-1.55532	5.95774	-7.51284	9.61158e-05	0.00266789	1.90786	Down		22
TC0100017368.hg.1	BPNT1	3'(2'), 5'-bisphosphate nucleotidase 1	-1.52902	7.67151	-7.4001	0.000106356	0.00277972	1.80396	Down		22
TC1000008795.hg.1	SLK	STE20 like kinase	-1.64933	7.85534	-7.36386	0.000109902	0.0028154	1.77026	Down		22
TC0800012435.hg.1	ZFAND1	zinc finger AN1-type containing 1	-2.05963	6.79577	-7.34568	0.000111731	0.00283373	1.7533	Down		22
TC1000011964.hg.1	RAB11FIP2	RAB11 family interacting protein 2	-1.5404	4.57537	-7.22567	0.00012469	0.00296376	1.64038	Down		22
TC1600011427.hg.1	IST1	IST1 factor associated with ESCRT-III	-1.5951	7.31152	-7.18628	0.000129304	0.0030163	1.60295	Down		22
TC1000012575.hg.1	ATAD1	ATPase family AAA domain containing 1	-1.51662	6.66579	-7.15983	0.000132508	0.00304704	1.57772	Down		22
TC0800011372.hg.1	SLC25A32	solute carrier family 25 member 32	-1.69861	5.73285	-7.15008	0.000133712	0.00305552	1.5684	Down		22
TC0800008279.hg.1	PLEKHF2	pleckstrin homology and FYVE domain containing 2	-1.59814	6.04957	-7.14351	0.000134529	0.00305769	1.56211	Down		22
TC0600006870.hg.1	SNRNP48	small nuclear ribonucleoprotein U11/U12 subunit 48	-1.97708	5.87774	-7.13974	0.000135001	0.00306199	1.55851	Down		22
TC1400007354.hg.1	PPM1A	protein phosphatase, Mg2+/Mn2+ dependent 1A	-1.62294	6.4801	-7.13003	0.000136225	0.00307574	1.5492	Down		22
TC0600011808.hg.1	MED20	mediator complex subunit 20	-2.00641	6.0679	-7.07261	0.000143721	0.00314044	1.49393	Down		22
TC1500009396.hg.1	SPPL2A	signal peptide peptidase like 2A	-3.0488	5.76416	-7.05991	0.00014544	0.00314551	1.48166	Down		22
TC1700011131.hg.1	MBTD1	mbt domain containing 1	-2.04879	4.33147	-6.94885	0.000161493	0.00330694	1.37348	Down		22
TC0200010252.hg.1	ASNSD1	asparagine synthetase domain containing 1	-2.00813	4.48566	-6.80278	0.000185697	0.00350651	1.22894	Down		22
TC0500007792.hg.1	HEXB	hexosaminidase subunit beta	-2.16757	7.85169	-6.75231	0.000194979	0.00360496	1.17838	Down		22
TC1300008809.hg.1	NUFIP1	nuclear FMR1 interacting protein 1	-1.55921	4.16261	-6.69027	0.000207107	0.0037015	1.1158	Down		22
TC0X00007781.hg.1	ZNF711	zinc finger protein 711	-1.72392	4.54339	-6.19772	0.000339521	0.00485487	0.601418	Down		22
TC1100011797.hg.1	RAB30	RAB30, member RAS oncogene family	-1.51362	3.95842	-5.99704	0.00041865	0.00545615	0.382592	Down		22
TC0400010132.hg.1	TAPT1	transmembrane anterior posterior transformation 1	-1.79594	5.63812	-5.92596	0.000451425	0.00569357	0.303762	Down		22
TC0400012638.hg.1	UFSP2	UFM1 specific peptidase 2	-1.83727	6.19895	-5.9233	0.000452708	0.00569816	0.300793	Down		22
TC1300009492.hg.1	TGDS	TDP-glucose 4,6-dehydratase	-2.09628	6.19768	-5.88671	0.000470739	0.00584045	0.259924	Down		22
TC1400010320.hg.1	BAG5	BAG cochaperone 5	-2.15765	4.04383	-5.76788	0.000535021	0.00631322	0.125898	Down		22
TC0200012219.hg.1	FAM98A	family with sequence similarity 98 member A	-1.57298	5.55061	-5.68142	0.000587907	0.00668646	0.0271179	Down		22
TC0900008091.hg.1	ERCC6L2	ERCC excision repair 6 like 2	-1.52752	3.90903	-5.41954	0.000786823	0.00793255	-0.278657	Down		22
TC0X00007480.hg.1	HEPH	hephaestin	-1.59546	7.42822	-5.29831	0.000903245	0.00862933	-0.423601	Down		22
TC0500008467.hg.1	SRFBP1	serum response factor binding protein 1	-1.62336	5.89649	-4.97934	0.00131124	0.0109427	-0.815482	Down		22
TC0200014893.hg.1	TLK1	tousled like kinase 1	-1.68548	6.53883	-4.83966	0.00155072	0.0121362	-0.991945	Down		22
TC0100009402.hg.1	CEPT1	choline/ethanolamine phosphotransferase 1	-1.85081	5.70808	-4.64432	0.00196993	0.0141869	-1.24369	Down		22
TC0100015509.hg.1	FAM72B	family with sequence similarity 72 member B	-2.62805	7.55493	-11.0815	6.5059e-06	0.00174206	4.58034	Down		20
TC1500007057.hg.1	TUBGCP4	tubulin gamma complex associated protein 4	-2.25168	5.93193	-10.8479	7.56878e-06	0.00174206	4.43602	Down		20
TC1100012981.hg.1	RCN1	reticulocalbin 1	-2.13148	4.96914	-10.783	7.89757e-06	0.00174206	4.39531	Down		20
TC0800012331.hg.1	NDUFAF6	NADH:ubiquinone oxidoreductase complex assembly factor 6	-1.79088	5.41005	-8.94482	2.92595e-05	0.0018902	3.11251	Down		20
TC1200010510.hg.1	SCAF11	SR-related CTD associated factor 11	-1.75197	4.95397	-8.81911	3.22662e-05	0.00191652	3.01469	Down		20
TC1200011099.hg.1	GNS	glucosamine (N-acetyl)-6-sulfatase	-2.13949	6.54285	-8.7722	3.34759e-05	0.00193361	2.97781	Down		20
TC1500007240.hg.1	TMOD3	tropomodulin 3	-2.63963	7.6306	-8.73921	3.4357e-05	0.00193574	2.95177	Down		20
TC0700011770.hg.1	KRIT1	KRIT1 ankyrin repeat containing	-2.98486	4.20728	-8.69398	3.56076e-05	0.0019416	2.91589	Down		20
TC1700012286.hg.1	SMG8	SMG8 nonsense mediated mRNA decay factor	-1.79033	3.90916	-8.63762	3.72381e-05	0.00197512	2.87092	Down		20
TC0200013943.hg.1	SLC35F5	solute carrier family 35 member F5	-2.18561	4.36034	-8.60567	3.81996e-05	0.0019789	2.84529	Down		20
TC1200011573.hg.1	NR2C1	nuclear receptor subfamily 2 group C member 1	-2.07318	5.15423	-8.49333	4.1808e-05	0.00200215	2.75443	Down		20
TC0100009056.hg.1	CCDC18	coiled-coil domain containing 18	-2.08519	3.61077	-8.45395	4.3162e-05	0.00203226	2.72229	Down		20
TC0200009922.hg.1	UBR3	ubiquitin protein ligase E3 component n-recognin 3	-1.86133	5.61191	-8.38816	4.55356e-05	0.00206107	2.66827	Down		20
TC0600008873.hg.1	UFL1	UFM1 specific ligase 1	-1.86814	5.37463	-8.3488	4.70251e-05	0.00208525	2.63575	Down		20
TC1500010866.hg.1	RAB27A	RAB27A, member RAS oncogene family	-1.77042	7.15652	-8.32476	4.79618e-05	0.00209469	2.61582	Down		20
TC1000010980.hg.1	ASCC1	activating signal cointegrator 1 complex subunit 1	-1.97177	7.23681	-8.28903	4.93928e-05	0.00210546	2.58608	Down		20
TC1300006974.hg.1	NAA16	N-alpha-acetyltransferase 16, NatA auxiliary subunit	-2.31984	4.55822	-8.07564	5.90045e-05	0.00222739	2.40585	Down		20
TC0300013635.hg.1	ACAP2	ArfGAP with coiled-coil, ankyrin repeat and PH domains 2	-1.7187	6.19675	-8.03373	6.11287e-05	0.00224881	2.36991	Down		20
TC0200012643.hg.1	CCDC88A	coiled-coil domain containing 88A	-2.51401	6.19944	-7.69939	8.15039e-05	0.00252283	2.07668	Down		20
TC0700008868.hg.1	TES	testin LIM domain protein	-2.25273	6.68906	-7.66891	8.37119e-05	0.00252763	2.04935	Down		20
TC0300013960.hg.1	HIGD1A	HIG1 hypoxia inducible domain family member 1A	-1.51182	7.84143	-7.66792	8.37847e-05	0.00252763	2.04846	Down		20
TC0100014947.hg.1	TMED5	transmembrane p24 trafficking protein 5	-1.53908	7.54088	-7.60531	8.85364e-05	0.00257207	1.99201	Down		20
TC2200007626.hg.1	ATXN10	ataxin 10	-1.85269	7.17892	-7.55711	9.23998e-05	0.00261661	1.94827	Down		20
TC0100015254.hg.1	LRIF1	ligand dependent nuclear receptor interacting factor 1	-2.24539	4.88577	-7.45758	0.00010099	0.00272098	1.85712	Down		20
TC0500011333.hg.1	TMEM167A	transmembrane protein 167A	-1.65795	7.11151	-7.29911	0.000116572	0.00288682	1.70968	Down		20
TC0300009016.hg.1	ATP1B3	ATPase Na+/K+ transporting subunit beta 3	-1.74255	6.282	-7.23781	0.000123305	0.00296326	1.65188	Down		20
TC0700006645.hg.1	USP42	ubiquitin specific peptidase 42	-1.86239	5.67282	-7.20811	0.000126724	0.00297767	1.62372	Down		20
TC0200013137.hg.1	GCFC2	GC-rich sequence DNA-binding factor 2	-1.50415	3.82519	-7.1763	0.000130503	0.00302961	1.59344	Down		20
TC0100009195.hg.1	SLC35A3	solute carrier family 35 member A3	-2.88964	5.71496	-7.16366	0.000132039	0.00304458	1.58138	Down		20
TC1200006935.hg.1	ATF7IP	activating transcription factor 7 interacting protein	-1.52007	5.09615	-7.14711	0.000134081	0.00305552	1.56556	Down		20
TC0100009333.hg.1	GPSM2	G protein signaling modulator 2	-1.65553	4.72128	-6.99648	0.000154377	0.00323234	1.42006	Down		20
TC0800010766.hg.1	LACTB2	lactamase beta 2	-2.62101	4.46282	-6.95264	0.000160912	0.00329923	1.37721	Down		20
TC0600012316.hg.1	TMEM30A	transmembrane protein 30A	-2.16859	6.30536	-6.90829	0.00016784	0.00335357	1.33361	Down		20
TC0100016351.hg.1	SLC19A2	solute carrier family 19 member 2	-2.65346	5.01639	-6.87814	0.000172739	0.0033971	1.30384	Down		20
TC1000009742.hg.1	KIN	Kin17 DNA and RNA binding protein	-1.88512	3.46244	-6.82527	0.00018172	0.00347067	1.25136	Down		20
TC0700006715.hg.1	PHF14	PHD finger protein 14	-2.04364	5.51629	-6.81881	0.000182852	0.00348156	1.24493	Down		20
TC1300006989.hg.1	AKAP11	A-kinase anchoring protein 11	-1.75174	5.12737	-6.80656	0.000185022	0.00350444	1.23271	Down		20
TC0400009467.hg.1	TRAPPC11	trafficking protein particle complex subunit 11	-1.53741	7.24228	-6.73724	0.000197852	0.00361953	1.16322	Down		20
TC0600012801.hg.1	SESN1	sestrin 1	-2.06975	5.49347	-6.70185	0.000204782	0.00367052	1.12751	Down		20
TC1700012440.hg.1	RNFT1	ring finger protein, transmembrane 1	-1.59499	4.51443	-6.64873	0.000215695	0.00379486	1.07363	Down		20
TC0900007663.hg.1	CEP78	centrosomal protein 78	-2.23172	4.04936	-6.62992	0.000219716	0.00383314	1.05446	Down		20
TC0300007596.hg.1	FLNB	filamin B	-1.58743	4.4648	-6.5322	0.000241985	0.00403266	0.954156	Down		20
TC0900007775.hg.1	NAA35	N-alpha-acetyltransferase 35, NatC auxiliary subunit	-1.96132	6.38147	-6.49099	0.000252122	0.00411335	0.911488	Down		20
TC0200008617.hg.1	PDCL3	phosducin like 3	-1.67888	4.88674	-6.45895	0.00026033	0.0041892	0.878159	Down		20
TC0200008894.hg.1	MERTK	MER proto-oncogene, tyrosine kinase	-2.17465	4.71311	-6.25679	0.000319507	0.00467826	0.664797	Down		20
TC0500011751.hg.1	FEM1C	fem-1 homolog C	-1.93568	5.81746	-6.22057	0.000331619	0.00478094	0.625987	Down		20
TC1700007204.hg.1	SPECC1	sperm antigen with calponin homology and coiled-coil domains 1	-1.59728	4.88634	-5.95024	0.000439918	0.00559723	0.330772	Down		20
TC0500013350.hg.1	RAPGEF6	Rap guanine nucleotide exchange factor 6	-1.73179	4.2832	-5.78357	0.000526002	0.00625782	0.143707	Down		20
TC1300009004.hg.1	ATP7B	ATPase copper transporting beta	-1.50954	4.63162	-5.7529	0.000543795	0.00638837	0.108857	Down		20
TC0400011791.hg.1	ANKRD50	ankyrin repeat domain 50	-1.76219	4.17056	-5.43838	0.000770264	0.00783912	-0.256323	Down		20
TC0X00008724.hg.1	HMGB3	high mobility group box 3	-1.5523	5.72355	-5.34267	0.000858576	0.00833837	-0.370317	Down		20
TC1200008592.hg.1	SCYL2	SCY1 like pseudokinase 2	-1.58549	6.97833	-4.86077	0.00151162	0.0119335	-0.965078	Down		20
TC0X00010038.hg.1	PHKA1	phosphorylase kinase regulatory subunit alpha 1	-1.76616	4.78688	-4.809	0.00160946	0.0124257	-1.03106	Down		20
TC0200007473.hg.1	CRIPT	CXXC repeat containing interactor of PDZ3 domain	-3.04458	5.84148	-14.7032	8.50438e-07	0.00174206	6.4261	Down		18
TC1000011522.hg.1	TM9SF3	transmembrane 9 superfamily member 3	-2.84318	5.36071	-12.8409	2.26622e-06	0.00174206	5.56071	Down		18
TC0600012413.hg.1	IBTK	inhibitor of Bruton tyrosine kinase	-2.8607	5.97982	-12.7155	2.4321e-06	0.00174206	5.49653	Down		18
TC0300013108.hg.1	TNIK	TRAF2 and NCK interacting kinase	-2.93724	5.52861	-11.9128	3.8836e-06	0.00174206	5.06577	Down		18
TC0500008921.hg.1	NDFIP1	Nedd4 family interacting protein 1	-2.23132	7.67665	-11.0275	6.73565e-06	0.00174206	4.54731	Down		18
TC0600013574.hg.1	RMND1	required for meiotic nuclear division 1 homolog	-2.27442	5.63806	-10.9392	7.13166e-06	0.00174206	4.49285	Down		18
TC1200012263.hg.1	MPHOSPH9	M-phase phosphoprotein 9	-2.79021	4.1514	-10.698	8.35282e-06	0.00174206	4.34156	Down		18
TC0700010687.hg.1	KBTBD2	kelch repeat and BTB domain containing 2	-2.29064	5.12841	-10.6083	8.8658e-06	0.00174206	4.28428	Down		18
TC0200007181.hg.1	YIPF4	Yip1 domain family member 4	-2.2731	5.92789	-10.5406	9.27644e-06	0.00174206	4.24068	Down		18
TC1500009522.hg.1	MNS1	meiosis specific nuclear structural 1	-2.32046	6.56211	-10.4198	1.00632e-05	0.00174206	4.16211	Down		18
TC1200007647.hg.1	ACVR1B	activin A receptor type 1B	-2.15017	5.41672	-10.408	1.01442e-05	0.00174206	4.15435	Down		18
TC0200009078.hg.1	EPB41L5	erythrocyte membrane protein band 4.1 like 5	-2.34605	6.14891	-10.2208	1.15294e-05	0.00174206	4.03033	Down		18
TC1100007168.hg.1	ARL14EP	ADP ribosylation factor like GTPase 14 effector protein	-2.17147	4.08468	-9.8123	1.53561e-05	0.00174206	3.75065	Down		18
TC0500009039.hg.1	FBXO38	F-box protein 38	-2.45999	3.8692	-9.64062	1.7376e-05	0.00174206	3.62927	Down		18
TC0100009723.hg.1	FAM72D	family with sequence similarity 72 member D	-2.41583	7.4637	-9.63686	1.74235e-05	0.00174206	3.62658	Down		18
TC1000007404.hg.1	CSGALNACT2	chondroitin sulfate N-acetylgalactosaminyltransferase 2	-2.17292	3.39683	-9.51299	1.90717e-05	0.00174206	3.5375	Down		18
TC1800007014.hg.1	DSG2	desmoglein 2	-2.06225	5.91662	-9.43982	2.01272e-05	0.00174206	3.4843	Down		18
TC0X00008228.hg.1	DOCK11	dedicator of cytokinesis 11	-2.34582	5.32604	-9.30864	2.2188e-05	0.00176109	3.3878	Down		18
TC0400007276.hg.1	KLHL5	kelch like family member 5	-2.27423	6.14848	-9.20399	2.40028e-05	0.00180035	3.30979	Down		18
TC0200012282.hg.1	ATL2	atlastin GTPase 2	-2.09941	6.77411	-8.9603	2.89115e-05	0.00188708	3.12446	Down		18
TC1000008961.hg.1	NHLRC2	NHL repeat containing 2	-2.26069	6.42735	-8.92126	2.97981e-05	0.00189399	3.09429	Down		18
TC0100008332.hg.1	ZYG11B	zyg-11 family member B, cell cycle regulator	-2.03445	6.48421	-8.87519	3.0884e-05	0.00191291	3.0585	Down		18
TC1300010025.hg.1	RNF6	ring finger protein 6	-1.93515	5.66172	-8.84048	3.17315e-05	0.00191634	3.03142	Down		18
TC0200010119.hg.1	PLEKHA3	pleckstrin homology domain containing A3	-1.92238	6.42173	-8.83767	3.18013e-05	0.00191634	3.02922	Down		18
TC1300007843.hg.1	TM9SF2	transmembrane 9 superfamily member 2	-1.89626	6.88449	-8.80814	3.25446e-05	0.00192546	3.00608	Down		18
TC0400009284.hg.1	CLCN3	chloride voltage-gated channel 3	-1.7989	7.22579	-8.73776	3.43964e-05	0.00193574	2.95062	Down		18
TC0X00008097.hg.1	NXT2	nuclear transport factor 2 like export factor 2	-2.0171	5.26124	-8.70823	3.52082e-05	0.00193732	2.92721	Down		18
TC0700010504.hg.1	OSBPL3	oxysterol binding protein like 3	-2.27401	4.5215	-8.64596	3.69917e-05	0.00197512	2.87759	Down		18
TC1500007180.hg.1	GALK2	galactokinase 2	-1.91655	4.48599	-8.63508	3.73137e-05	0.00197512	2.86888	Down		18
TC0600009261.hg.1	NUS1	NUS1 dehydrodolichyl diphosphate synthase subunit	-2.67866	7.30054	-8.59161	3.86316e-05	0.00198014	2.83398	Down		18
TC1300006767.hg.1	USPL1	ubiquitin specific peptidase like 1	-1.82828	4.6097	-8.43734	4.3748e-05	0.00203801	2.70869	Down		18
TC0600007684.hg.1	SLC39A7	solute carrier family 39 member 7	-1.9615	6.88466	-8.43223	4.39299e-05	0.00203801	2.7045	Down		18
TC0100012062.hg.1	TBCE	tubulin folding cofactor E	-1.82051	5.49371	-8.35982	4.66028e-05	0.0020814	2.64487	Down		18
TC0200007805.hg.1	AFTPH	aftiphilin	-1.7767	7.57765	-8.34964	4.6993e-05	0.00208525	2.63644	Down		18
TC0200015080.hg.1	PRKRA	protein activator of interferon induced protein kinase EIF2AK2	-1.86207	7.99932	-8.3203	4.81381e-05	0.00209634	2.61211	Down		18
TC2100008494.hg.1	IFNAR2	interferon alpha and beta receptor subunit 2	-2.17356	7.52597	-8.26675	5.03097e-05	0.00211292	2.56747	Down		18
TC0700013291.hg.1	ESYT2	extended synaptotagmin 2	-1.70995	6.31292	-8.22298	5.21662e-05	0.00213526	2.53078	Down		18
TC1500008023.hg.1	ZFAND6	zinc finger AN1-type containing 6	-1.70468	8.17521	-8.11876	5.69046e-05	0.00219578	2.44264	Down		18
TC1000008875.hg.1	ADD3	adducin 3	-1.59568	5.13054	-8.10752	5.74436e-05	0.0022049	2.43307	Down		18
TC0600012713.hg.1	PREP	prolyl endopeptidase	-1.76632	7.20357	-8.10264	5.76793e-05	0.00220809	2.42891	Down		18
TC0100011382.hg.1	DYRK3	dual specificity tyrosine phosphorylation regulated kinase 3	-1.90408	4.8445	-8.02324	6.16739e-05	0.00225559	2.36089	Down		18
TC1400007554.hg.1	SLC39A9	solute carrier family 39 member 9	-2.30623	5.30449	-8.00146	6.28231e-05	0.00227246	2.34212	Down		18
TC0800012457.hg.1	TMEM65	transmembrane protein 65	-2.17058	5.41326	-7.98531	6.36904e-05	0.00227586	2.32817	Down		18
TC1500010736.hg.1	BLOC1S6	biogenesis of lysosomal organelles complex 1 subunit 6	-1.59643	6.84066	-7.93322	6.65818e-05	0.00230498	2.28299	Down		18
TC1000012580.hg.1	ARHGAP19	Rho GTPase activating protein 19	-1.96434	7.69303	-7.66871	8.37263e-05	0.00252763	2.04917	Down		18
TC0100012602.hg.1	CEP104	centrosomal protein 104	-1.80862	6.01304	-7.62837	8.67516e-05	0.00255673	2.01286	Down		18
TC1700008378.hg.1	MSI2	musashi RNA binding protein 2	-1.97823	5.36891	-7.61835	8.75221e-05	0.00256377	2.00381	Down	oncogene, fusion	18
TC1400010632.hg.1	GPATCH2L	G-patch domain containing 2 like	-1.68838	5.72244	-7.61507	8.77764e-05	0.00256833	2.00084	Down		18
TC1800008458.hg.1	ZNF24	zinc finger protein 24	-1.50059	6.72519	-7.56453	9.17933e-05	0.00260623	1.95502	Down		18
TC1800008862.hg.1	PIGN	phosphatidylinositol glycan anchor biosynthesis class N	-2.05939	4.78549	-7.48287	9.87259e-05	0.00269383	1.88038	Down		18
TC0100007333.hg.1	PITHD1	PITH domain containing 1	-1.66955	7.35951	-7.44282	0.000102339	0.00273736	1.8435	Down		18
TC0X00008240.hg.1	PGRMC1	progesterone receptor membrane component 1	-1.72442	8.21976	-7.4145	0.000104982	0.00276899	1.81732	Down		18
TC0300011859.hg.1	ZBTB11	zinc finger and BTB domain containing 11	-2.84869	5.30275	-7.40528	0.000105859	0.00277496	1.80877	Down		18
TC0100017420.hg.1	DUSP10	dual specificity phosphatase 10	-1.83875	4.95703	-7.3767	0.00010863	0.00280306	1.78222	Down		18
TC0500009856.hg.1	CLPTM1L	CLPTM1 like	-2.02982	5.4221	-7.35941	0.000110346	0.00282116	1.76612	Down		18
TC0400009322.hg.1	GALNT7	polypeptide N-acetylgalactosaminyltransferase 7	-1.63184	6.06088	-7.2803	0.000118593	0.00290609	1.69199	Down		18
TC1100010261.hg.1	HPS5	HPS5 biogenesis of lysosomal organelles complex 2 subunit 2	-1.98608	4.59712	-7.26958	0.000119763	0.00291433	1.68189	Down		18
TC0300010561.hg.1	SLC4A7	solute carrier family 4 member 7	-1.50788	4.25806	-7.22532	0.00012473	0.00296376	1.64005	Down		18
TC1500007318.hg.1	TEX9	testis expressed 9	-1.68631	4.94058	-7.22141	0.00012518	0.00296632	1.63635	Down		18
TC0100012687.hg.1	NOL9	nucleolar protein 9	-1.71662	6.24494	-7.10477	0.000139467	0.00309854	1.52493	Down		18
TC1600010227.hg.1	N4BP1	NEDD4 binding protein 1	-1.63172	7.32918	-7.06916	0.000144185	0.00314044	1.4906	Down		18
TC1700012231.hg.1	TMEM98	transmembrane protein 98	-1.51565	6.51382	-6.95307	0.000160848	0.00329923	1.37762	Down		18
TC1500010292.hg.1	SEC11A	SEC11 homolog A, signal peptidase complex subunit	-1.58185	9.55446	-6.92874	0.000164606	0.00332363	1.35374	Down		18
TC2000007320.hg.1	RALGAPB	Ral GTPase activating protein non-catalytic subunit beta	-1.73634	6.46765	-6.83407	0.000180189	0.00345969	1.26013	Down		18
TC1000009149.hg.1	PLEKHA1	pleckstrin homology domain containing A1	-1.53269	3.47695	-6.68489	0.000208198	0.0037138	1.11035	Down		18
TC1800009281.hg.1	IER3IP1	immediate early response 3 interacting protein 1	-1.84012	6.11303	-6.67584	0.000210047	0.00373405	1.10118	Down		18
TC0500008054.hg.1	POLR3G	RNA polymerase III subunit G	-1.53499	7.10883	-6.60736	0.000224646	0.00388384	1.03142	Down		18
TC2100008495.hg.1	IL10RB	interleukin 10 receptor subunit beta	-2.09259	4.67773	-6.55507	0.000236557	0.00398039	0.977741	Down		18
TC1100013005.hg.1	ZFP91	ZFP91 zinc finger protein, atypical E3 ubiquitin ligase	-1.88769	6.21555	-6.50595	0.000248388	0.00407429	0.927002	Down		18
TC1800007895.hg.1	METTL4	methyltransferase like 4	-2.35154	5.54332	-6.44097	0.000265064	0.00422739	0.859406	Down		18
TC0100008618.hg.1	AK4	adenylate kinase 4	-1.73949	7.9271	-6.42369	0.000269708	0.00425302	0.841329	Down		18
TC1300007774.hg.1	MBNL2	muscleblind like splicing regulator 2	-1.68385	8.32791	-6.41156	0.00027302	0.00427882	0.828624	Down		18
TC0800010607.hg.1	ASPH	aspartate beta-hydroxylase	-1.72615	8.21602	-6.38001	0.000281849	0.00436628	0.795487	Down		18
TC0300010424.hg.1	DPH3	diphthamide biosynthesis 3	-1.67495	5.23267	-6.33756	0.000294234	0.00446151	0.750689	Down		18
TC1400010730.hg.1	EGLN3	egl-9 family hypoxia inducible factor 3	-2.19772	5.8985	-6.23033	0.000328307	0.00475716	0.636458	Down		18
TC0500010497.hg.1	NADK2	NAD kinase 2, mitochondrial	-1.95758	6.22498	-6.18098	0.00034544	0.00489559	0.583382	Down		18
TC1700010041.hg.1	AKAP10	A-kinase anchoring protein 10	-1.92977	4.26142	-6.10328	0.000374474	0.00512009	0.499122	Down		18
TC0300013934.hg.1	EMC3	ER membrane protein complex subunit 3	-1.55291	6.51536	-5.99413	0.000419936	0.0054593	0.379385	Down		18
TC0100014895.hg.1	ZNF644	zinc finger protein 644	-1.83172	5.28042	-5.94412	0.000442791	0.00562388	0.323965	Down		18
TC1500009782.hg.1	PDCD7	programmed cell death 7	-2.86769	5.55158	-5.89387	0.000467147	0.0058125	0.267941	Down		18
TC0500010731.hg.1	ARL15	ADP ribosylation factor like GTPase 15	-1.51318	6.37053	-5.79185	0.000521305	0.00622412	0.153101	Down		18
TC1700010731.hg.1	PSMC3IP	PSMC3 interacting protein	-1.61304	6.0802	-5.74445	0.000548813	0.00642012	0.0992328	Down		18
TC0500013020.hg.1	CLK4	CDC like kinase 4	-1.65907	6.15686	-5.69537	0.000578994	0.00662166	0.0431303	Down		18
TC1700011121.hg.1	TOB1	transducer of ERBB2, 1	-1.50961	8.0694	-5.60002	0.000643031	0.00709049	-0.0668599	Down		18
TC1000008351.hg.1	MINPP1	multiple inositol-polyphosphate phosphatase 1	-1.53709	5.89145	-5.5719	0.000663385	0.00719612	-0.099549	Down		18
TC1500006956.hg.1	BAHD1	bromo adjacent homology domain containing 1	-1.52973	7.0569	-5.48985	0.000726961	0.0076082	-0.195583	Down		18
TC0900010769.hg.1	NFIL3	nuclear factor, interleukin 3 regulated	-1.64572	7.7339	-5.37463	0.000827896	0.00815962	-0.332095	Down		18
TC0300012255.hg.1	OSBPL11	oxysterol binding protein like 11	-1.73074	4.31937	-5.34234	0.000858895	0.0083396	-0.370707	Down		18
TC1600008231.hg.1	NFAT5	nuclear factor of activated T cells 5	-1.53171	6.02601	-5.21484	0.000994433	0.00917346	-0.524676	Down		18
TC1400008415.hg.1	ZFYVE21	zinc finger FYVE-type containing 21	-1.86173	4.44096	-5.08565	0.00115624	0.0100611	-0.683177	Down		18
TC0300008352.hg.1	GTPBP8	GTP binding protein 8 (putative)	-3.90751	4.86177	-17.9702	1.96272e-07	0.00174206	7.62171	Down		16
TC0900006758.hg.1	DENND4C	DENN domain containing 4C	-2.61971	4.38158	-13.2085	1.84893e-06	0.00174206	5.74429	Down		16
TC1300008824.hg.1	SLC25A30	solute carrier family 25 member 30	-2.37934	3.28004	-11.9303	3.8429e-06	0.00174206	5.07557	Down		16
TC0800008758.hg.1	FAM91A1	family with sequence similarity 91 member A1	-2.63252	3.81745	-11.8972	3.92029e-06	0.00174206	5.05702	Down		16
TC0500008494.hg.1	CSNK1G3	casein kinase 1 gamma 3	-2.35126	5.05423	-11.4641	5.10931e-06	0.00174206	4.80901	Down		16
TC2000006694.hg.1	SLX4IP	SLX4 interacting protein	-2.25934	4.33752	-11.287	5.70876e-06	0.00174206	4.70431	Down		16
TC0700008141.hg.1	PTPN12	protein tyrosine phosphatase non-receptor type 12	-2.39917	5.79289	-11.0648	6.57597e-06	0.00174206	4.57015	Down		16
TC0500013226.hg.1	CDC42SE2	CDC42 small effector 2	-2.66687	7.48216	-10.9095	7.27036e-06	0.00174206	4.47447	Down		16
TC0X00008223.hg.1	WDR44	WD repeat domain 44	-2.0614	5.85528	-10.3745	1.03779e-05	0.00174206	4.13233	Down		16
TC0400011823.hg.1	PGRMC2	progesterone receptor membrane component 2	-2.42788	7.53462	-10.3074	1.08642e-05	0.00174206	4.08798	Down		16
TC0400012949.hg.1	SLC39A8	solute carrier family 39 member 8	-2.19956	5.81047	-9.82039	1.52677e-05	0.00174206	3.75631	Down		16
TC1700007451.hg.1	CPD	carboxypeptidase D	-1.89548	5.76143	-9.602	1.78705e-05	0.00174206	3.60164	Down		16
TC0600013054.hg.1	SERINC1	serine incorporator 1	-2.18912	7.00676	-9.51854	1.89942e-05	0.00174206	3.54152	Down		16
TC0400009024.hg.1	ARFIP1	ADP ribosylation factor interacting protein 1	-1.99849	4.2527	-9.44706	2.00198e-05	0.00174206	3.48959	Down		16
TC0300008999.hg.1	ZBTB38	zinc finger and BTB domain containing 38	-2.44405	4.41809	-9.34557	2.15848e-05	0.00176109	3.41512	Down		16
TC0100008564.hg.1	ATG4C	autophagy related 4C cysteine peptidase	-2.3302	5.00433	-9.31269	2.21209e-05	0.00176109	3.39081	Down		16
TC0700009174.hg.1	MKLN1	muskelin 1	-2.25277	6.49184	-9.18659	2.43204e-05	0.0018017	3.29673	Down		16
TC0500007303.hg.1	NNT	nicotinamide nucleotide transhydrogenase	-2.3341	6.20007	-9.1717	2.4596e-05	0.00180714	3.28553	Down		16
TC0700006984.hg.1	SNX10	sorting nexin 10	-2.22712	5.78567	-9.13127	2.5362e-05	0.00181986	3.25503	Down		16
TC0200009537.hg.1	KYNU	kynureninase	-1.88078	3.65995	-8.96641	2.87754e-05	0.00188708	3.12917	Down		16
TC1000012056.hg.1	ATE1	arginyltransferase 1	-2.67895	4.14256	-8.70911	3.51837e-05	0.00193732	2.92791	Down		16
TC0100018462.hg.1	CLCC1	chloride channel CLIC like 1	-1.85461	6.51179	-8.57465	3.91596e-05	0.00198378	2.82032	Down		16
TC0100013636.hg.1	RNF19B	ring finger protein 19B	-1.78431	6.53322	-8.52978	4.05969e-05	0.00198916	2.78404	Down		16
TC0600014321.hg.1	SNX14	sorting nexin 14	-2.41668	5.99888	-8.3791	4.58737e-05	0.00206555	2.6608	Down		16
TC0400012551.hg.1	DCTD	dCMP deaminase	-1.70605	7.14581	-8.32645	4.78954e-05	0.00209393	2.61722	Down		16
TC1200012835.hg.1	NT5DC3	5'-nucleotidase domain containing 3	-1.82579	5.15527	-8.28854	4.94128e-05	0.00210546	2.58567	Down		16
TC0200010009.hg.1	SCRN3	secernin 3	-1.7554	5.067	-8.09817	5.78967e-05	0.00221251	2.42509	Down		16
TC1200007010.hg.1	PLEKHA5	pleckstrin homology domain containing A5	-2.16457	4.77156	-7.9579	6.51937e-05	0.00228311	2.30444	Down		16
TC0500007607.hg.1	NLN	neurolysin	-1.83714	6.33863	-7.86697	7.04732e-05	0.00237335	2.22512	Down		16
TC1800009268.hg.1	DSC2	desmocollin 2	-1.87337	6.26581	-7.72098	7.99798e-05	0.00249611	2.09597	Down		16
TC1200010518.hg.1	SLC38A2	solute carrier family 38 member 2	-2.43783	6.37907	-7.71855	8.01502e-05	0.00249783	2.0938	Down		16
TC0200006757.hg.1	TRIB2	tribbles pseudokinase 2	-1.90716	6.13823	-7.69898	8.15335e-05	0.00252283	2.07631	Down		16
TC0700012812.hg.1	MKRN1	makorin ring finger protein 1	-1.54099	8.3976	-7.69152	8.20681e-05	0.00252707	2.06963	Down		16
TC1100006906.hg.1	FAR1	fatty acyl-CoA reductase 1	-1.51624	6.68341	-7.67379	8.33534e-05	0.00252707	2.05374	Down		16
TC0200014610.hg.1	NMI	N-myc and STAT interactor	-1.94303	5.18725	-7.66158	8.42526e-05	0.00253335	2.04277	Down		16
TC0X00009250.hg.1	ACOT9	acyl-CoA thioesterase 9	-1.78459	5.54406	-7.57604	9.08609e-05	0.0025963	1.96547	Down		16
TC0100016548.hg.1	ABL2	ABL proto-oncogene 2, non-receptor tyrosine kinase	-1.79082	4.82998	-7.54235	9.36204e-05	0.00263481	1.93482	Down	oncogene, fusion	16
TC0300014052.hg.1	RYK	receptor like tyrosine kinase	-1.8972	6.41179	-7.45565	0.000101165	0.00272273	1.85534	Down		16
TC0200012433.hg.1	PREPL	prolyl endopeptidase like	-1.53799	7.32548	-7.30902	0.000115523	0.00287929	1.71898	Down		16
TC0500010427.hg.1	ZFR	zinc finger RNA binding protein	-1.56006	6.74529	-7.29166	0.000117368	0.00289334	1.70268	Down		16
TC1400008945.hg.1	RALGAPA1	Ral GTPase activating protein catalytic subunit alpha 1	-1.84421	4.50735	-7.18782	0.00012912	0.00301517	1.60442	Down		16
TC0200007176.hg.1	SLC30A6	solute carrier family 30 member 6	-1.9118	5.60689	-7.17905	0.000130171	0.00302692	1.59607	Down		16
TC1500007091.hg.1	CTDSPL2	CTD small phosphatase like 2	-1.74795	7.26018	-7.15983	0.000132508	0.00304704	1.57772	Down		16
TC1000009844.hg.1	SEPHS1	selenophosphate synthetase 1	-1.50067	6.10583	-7.11999	0.000137504	0.00308173	1.53956	Down		16
TC0400009137.hg.1	FNIP2	folliculin interacting protein 2	-2.24606	4.87799	-7.11445	0.000138214	0.00308333	1.53424	Down		16
TC1200010119.hg.1	C2CD5	C2 calcium dependent domain containing 5	-1.84492	4.4705	-6.98285	0.000156377	0.00325811	1.40676	Down		16
TC2000006551.hg.1	ATRN	attractin	-2.18834	5.98154	-6.93828	0.00016312	0.00331679	1.36312	Down		16
TC1700009378.hg.1	PITPNA	phosphatidylinositol transfer protein alpha	-1.91748	6.08053	-6.92826	0.000164681	0.00332363	1.35327	Down		16
TC0700011847.hg.1	SLC25A13	solute carrier family 25 member 13	-1.75775	5.93661	-6.90015	0.000169148	0.00336772	1.32558	Down		16
TC1500010893.hg.1	PTPN9	protein tyrosine phosphatase non-receptor type 9	-1.98151	5.13997	-6.82547	0.000181685	0.00347067	1.25156	Down		16
TC0100012097.hg.1	LGALS8	galectin 8	-2.34923	6.6454	-6.82139	0.000182398	0.0034779	1.2475	Down		16
TC0600014074.hg.1	HIVEP1	HIVEP zinc finger 1	-1.5248	5.05018	-6.72688	0.000199853	0.00364295	1.15278	Down		16
TC1100007390.hg.1	EXT2	exostosin glycosyltransferase 2	-1.75777	6.22994	-6.71136	0.000202892	0.0036495	1.13713	Down	TSG	16
TC0400009519.hg.1	SNX25	sorting nexin 25	-1.73293	5.76234	-6.6199	0.000221891	0.00385926	1.04423	Down		16
TC1400007244.hg.1	KTN1	kinectin 1	-2.37517	5.35748	-6.44609	0.000263705	0.00421754	0.864754	Down		16
TC1200011671.hg.1	UHRF1BP1L	UHRF1 binding protein 1 like	-1.60438	7.11772	-6.27144	0.000314751	0.00464761	0.680432	Down		16
TC0100014650.hg.1	ZZZ3	zinc finger ZZ-type containing 3	-1.87255	6.02011	-6.25897	0.000318796	0.00467463	0.667118	Down		16
TC0900010910.hg.1	SLC35D2	solute carrier family 35 member D2	-1.53274	6.59617	-5.93539	0.000446915	0.00565899	0.314265	Down		16
TC0100018344.hg.1	LYPLAL1	lysophospholipase like 1	-1.53058	6.50132	-5.93031	0.000449341	0.00567387	0.308604	Down		16
TC1500009973.hg.1	ADPGK	ADP dependent glucokinase	-1.5344	6.06335	-5.68387	0.000586329	0.00667925	0.029934	Down		16
TC1100011811.hg.1	CCDC90B	coiled-coil domain containing 90B	-1.55576	6.70059	-5.50739	0.000712818	0.00750624	-0.174963	Down		16
TC1100010063.hg.1	TMEM41B	transmembrane protein 41B	-1.53728	6.31434	-5.49205	0.00072517	0.007594	-0.192993	Down		16
TC0500010813.hg.1	MIER3	MIER family member 3	-1.75094	3.48032	-5.4861	0.000730021	0.00763103	-0.199992	Down		16
TC1700011273.hg.1	TRIM37	tripartite motif containing 37	-1.53184	4.19961	-5.01755	0.00125306	0.0106599	-0.767739	Down		16
TC0400007306.hg.1	N4BP2	NEDD4 binding protein 2	-2.45257	4.43481	-11.7233	4.35554e-06	0.00174206	4.95879	Down	TSG	14
TC0600012132.hg.1	RAB23	RAB23, member RAS oncogene family	-2.55416	3.32283	-11.1967	6.04475e-06	0.00174206	4.65015	Down		14
TC2200007195.hg.1	HMGXB4	HMG-box containing 4	-2.10946	4.10204	-10.3295	1.0701e-05	0.00174206	4.10264	Down		14
TC0200007249.hg.1	GPATCH11	G-patch domain containing 11	-2.16599	5.11685	-10.2525	1.12806e-05	0.00174206	4.05151	Down		14
TC1000010993.hg.1	MICU1	mitochondrial calcium uptake 1	-2.19185	7.23327	-10.1988	1.17056e-05	0.00174206	4.01559	Down		14
TC1000010758.hg.1	RTKN2	rhotekin 2	-2.2321	3.91209	-9.87825	1.46515e-05	0.00174206	3.79666	Down		14
TC1300009673.hg.1	TEX30	testis expressed 30	-2.88543	5.0738	-9.73091	1.62788e-05	0.00174206	3.69339	Down		14
TC1200008255.hg.1	ZDHHC17	zinc finger DHHC-type palmitoyltransferase 17	-1.95972	4.08315	-9.70737	1.65571e-05	0.00174206	3.67674	Down		14
TC0200014857.hg.1	FASTKD1	FAST kinase domains 1	-2.38355	3.83447	-9.24862	2.32091e-05	0.00178678	3.34318	Down		14
TC1300008702.hg.1	ELF1	E74 like ETS transcription factor 1	-2.24874	7.14518	-9.03761	2.72416e-05	0.00187589	3.18382	Down		14
TC0400008329.hg.1	GSTCD	glutathione S-transferase C-terminal domain containing	-1.9327	6.96511	-8.96201	2.88732e-05	0.00188708	3.12578	Down		14
TC1600006760.hg.1	UBN1	ubinuclein 1	-1.83143	5.36467	-8.8977	3.03481e-05	0.00190938	3.07601	Down		14
TC0100010761.hg.1	FAM20B	FAM20B glycosaminoglycan xylosylkinase	-2.18179	6.03216	-8.7874	3.30783e-05	0.00192547	2.98979	Down		14
TC1800009280.hg.1	HDHD2	haloacid dehalogenase like hydrolase domain containing 2	-1.90558	5.10953	-8.68089	3.59791e-05	0.00195241	2.90547	Down		14
TC0800006566.hg.1	AGPAT5	1-acylglycerol-3-phosphate O-acyltransferase 5	-2.23599	5.43749	-8.53427	4.04505e-05	0.00198916	2.78768	Down		14
TC0500011435.hg.1	LYSMD3	LysM domain containing 3	-2.49402	6.39391	-8.4668	4.27148e-05	0.00202079	2.73279	Down		14
TC1700010592.hg.1	ORMDL3	ORMDL sphingolipid biosynthesis regulator 3	-1.66065	5.40094	-8.33612	4.75167e-05	0.00209393	2.62524	Down		14
TC0600014154.hg.1	SLC35A1	solute carrier family 35 member A1	-1.70598	4.59589	-8.26662	5.0315e-05	0.00211292	2.56737	Down		14
TC1800009056.hg.1	ZADH2	zinc binding alcohol dehydrogenase domain containing 2	-1.83648	4.79092	-8.18135	5.40037e-05	0.00215281	2.4957	Down		14
TC0300008331.hg.1	ABHD10	abhydrolase domain containing 10, depalmitoylase	-1.84612	4.44815	-8.13844	5.59739e-05	0.00217995	2.45937	Down		14
TC1800007667.hg.1	TIMM21	translocase of inner mitochondrial membrane 21	-1.9746	5.31128	-8.10461	5.7584e-05	0.00220809	2.43059	Down		14
TC0500011748.hg.1	CCDC112	coiled-coil domain containing 112	-1.86958	5.88737	-8.04815	6.0388e-05	0.00224471	2.3823	Down		14
TC0600009368.hg.1	HINT3	histidine triad nucleotide binding protein 3	-2.14512	5.78541	-8.00712	6.25219e-05	0.0022694	2.347	Down		14
TC0100014638.hg.1	PIGK	phosphatidylinositol glycan anchor biosynthesis class K	-2.08728	6.09375	-7.89487	6.88037e-05	0.00234451	2.24955	Down		14
TC0100009738.hg.1	GPR89A	G protein-coupled receptor 89A	-2.01417	5.312	-7.86337	7.06915e-05	0.00237335	2.22197	Down		14
TC0700010257.hg.1	ICA1	islet cell autoantigen 1	-1.56434	7.80552	-7.85488	7.12104e-05	0.00238307	2.21451	Down		14
TC1100007287.hg.1	TRIM44	tripartite motif containing 44	-2.46714	6.30092	-7.82515	7.30607e-05	0.00240849	2.18835	Down		14
TC0100010755.hg.1	RALGPS2	Ral GEF with PH domain and SH3 binding motif 2	-2.38469	4.80969	-7.82258	7.3223e-05	0.00240997	2.18609	Down		14
TC0700006783.hg.1	TSPAN13	tetraspanin 13	-2.04279	8.59956	-7.67767	8.30703e-05	0.00252707	2.05722	Down		14
TC0300014090.hg.1	ATP13A3	ATPase 13A3	-2.07986	6.48091	-7.64025	8.58481e-05	0.00255049	2.02357	Down		14
TC0600013880.hg.1	SFT2D1	SFT2 domain containing 1	-1.58677	5.76952	-7.57754	9.074e-05	0.0025963	1.96684	Down		14
TC0100014060.hg.1	ATPAF1	ATP synthase mitochondrial F1 complex assembly factor 1	-2.19631	5.19626	-7.53887	9.39115e-05	0.00263622	1.93164	Down		14
TC0X00008516.hg.1	CT45A1	cancer/testis antigen family 45 member A1	-1.60181	6.21224	-7.41162	0.000105255	0.00277097	1.81465	Down		14
TC0400012375.hg.1	CBR4	carbonyl reductase 4	-2.23166	6.01943	-7.30261	0.000116199	0.00288356	1.71297	Down		14
TC1000011382.hg.1	PANK1	pantothenate kinase 1	-1.61047	4.11313	-7.23488	0.000123638	0.00296326	1.6491	Down		14
TC0600008468.hg.1	FAM135A	family with sequence similarity 135 member A	-2.14345	3.60517	-7.22447	0.000124828	0.00296445	1.63925	Down		14
TC0500008278.hg.1	FER	FER tyrosine kinase	-2.06831	4.40144	-7.20711	0.000126841	0.00297767	1.62277	Down		14
TC0500008437.hg.1	TNFAIP8	TNF alpha induced protein 8	-1.62975	5.75999	-7.1302	0.000136203	0.00307574	1.54936	Down		14
TC1100010491.hg.1	FBXO3	F-box protein 3	-1.63537	5.30467	-7.12043	0.000137448	0.00308173	1.53998	Down		14
TC0300006702.hg.1	CAPN7	calpain 7	-1.63357	5.75418	-7.08647	0.00014187	0.00312259	1.50731	Down		14
TC0200011686.hg.1	ITGB1BP1	integrin subunit beta 1 binding protein 1	-1.88966	3.9684	-7.05951	0.000145494	0.00314551	1.48127	Down		14
TC0200007664.hg.1	VRK2	VRK serine/threonine kinase 2	-1.87297	6.96489	-7.04216	0.000147881	0.00317451	1.46447	Down		14
TC1100007507.hg.1	PTPRJ	protein tyrosine phosphatase receptor type J	-2.11411	5.46131	-6.88272	0.000171986	0.00338912	1.30836	Down		14
TC1000010961.hg.1	PSAP	prosaposin	-1.6537	9.09968	-6.8581	0.000176084	0.00342021	1.28399	Down		14
TC1100008518.hg.1	ACER3	alkaline ceramidase 3	-1.72505	5.67678	-6.85285	0.000176972	0.0034288	1.27878	Down		14
TC1500007980.hg.1	CHRNA5	cholinergic receptor nicotinic alpha 5 subunit	-1.69366	4.47849	-6.71765	0.000201654	0.00364704	1.14348	Down		14
TC1100008797.hg.1	PANX1	pannexin 1	-1.54628	4.46563	-6.59183	0.000228112	0.00391415	1.01551	Down		14
TC1700010293.hg.1	CRLF3	cytokine receptor like factor 3	-1.6832	5.13308	-6.51391	0.000246426	0.00406145	0.935249	Down		14
TC2100007599.hg.1	SAMSN1	SAM domain, SH3 domain and nuclear localization signals 1	-1.59224	8.53229	-6.39796	0.000276787	0.0043176	0.814356	Down		14
TC0500009690.hg.1	RUFY1	RUN and FYVE domain containing 1	-1.93937	5.21643	-6.26684	0.000316236	0.00466042	0.675524	Down		14
TC0800010490.hg.1	TMEM68	transmembrane protein 68	-2.57797	6.01944	-6.20195	0.000338041	0.00484005	0.605976	Down		14
TC0X00010926.hg.1	MAP7D3	MAP7 domain containing 3	-1.70412	5.81253	-5.98379	0.000424551	0.00549042	0.367958	Down		14
TC1500008983.hg.1	SLC12A6	solute carrier family 12 member 6	-1.50093	6.16093	-5.88799	0.000470096	0.00583987	0.261355	Down		14
TC0400009352.hg.1	CEP44	centrosomal protein 44	-1.78503	5.06895	-5.80039	0.000516519	0.00619424	0.162761	Down		14
TC1500008511.hg.1	LRRC28	leucine rich repeat containing 28	-1.6889	5.71235	-5.78246	0.00052663	0.00625853	0.142456	Down		14
TC0100015079.hg.1	EXTL2	exostosin like glycosyltransferase 2	-2.26333	3.85706	-11.295	5.67992e-06	0.00174206	4.7091	Down		12
TC0X00010966.hg.1	ATP11C	ATPase phospholipid transporting 11C	-2.11084	5.76935	-10.7234	8.21378e-06	0.00174206	4.35767	Down		12
TC0300006847.hg.1	NR1D2	nuclear receptor subfamily 1 group D member 2	-2.26116	4.38982	-10.6805	8.44999e-06	0.00174206	4.33046	Down		12
TC0100010623.hg.1	SUCO	SUN domain containing ossification factor	-2.10617	4.91044	-10.5984	8.92429e-06	0.00174206	4.27795	Down		12
TC0200007929.hg.1	GMCL1	germ cell-less 1, spermatogenesis associated	-2.09237	6.14622	-10.5452	9.2479e-06	0.00174206	4.24365	Down		12
TC0300012718.hg.1	PLOD2	procollagen-lysine,2-oxoglutarate 5-dioxygenase 2	-2.08859	7.08787	-10.1959	1.1729e-05	0.00174206	4.01365	Down		12
TC0200013079.hg.1	DUSP11	dual specificity phosphatase 11	-1.98785	7.00269	-10.0929	1.25982e-05	0.00174206	3.9441	Down		12
TC1100008790.hg.1	C11orf54	chromosome 11 open reading frame 54	-2.17225	5.46755	-10.0113	1.33384e-05	0.00174206	3.88843	Down		12
TC0800010575.hg.1	CA8	carbonic anhydrase 8	-2.21013	6.62206	-10.011	1.33409e-05	0.00174206	3.88825	Down		12
TC0800008510.hg.1	OXR1	oxidation resistance 1	-2.2601	5.24166	-9.87392	1.46967e-05	0.00174206	3.79365	Down		12
TC0100007569.hg.1	GMEB1	glucocorticoid modulatory element binding protein 1	-2.12076	4.22503	-9.74801	1.60799e-05	0.00174206	3.70547	Down		12
TC2100007996.hg.1	TMEM50B	transmembrane protein 50B	-1.94786	6.33863	-9.72603	1.63361e-05	0.00174206	3.68994	Down		12
TC0300008271.hg.1	BBX	BBX high mobility group box domain containing	-2.10908	5.40003	-9.58548	1.80868e-05	0.00174206	3.58979	Down		12
TC1500009845.hg.1	AAGAB	alpha and gamma adaptin binding protein	-1.92954	7.14055	-9.55027	1.85579e-05	0.00174206	3.56444	Down		12
TC0200016563.hg.1	KLHL23	kelch like family member 23	-2.13975	5.56547	-9.53084	1.88236e-05	0.00174206	3.55042	Down		12
TC0800008062.hg.1	ZBTB10	zinc finger and BTB domain containing 10	-1.94026	4.83609	-9.50722	1.91525e-05	0.00174206	3.53333	Down		12
TC0300008561.hg.1	PARP14	poly(ADP-ribose) polymerase family member 14	-2.0077	4.49908	-9.30446	2.22574e-05	0.00176109	3.38471	Down		12
TC1500007513.hg.1	LACTB	lactamase beta	-1.84932	5.59843	-9.07089	2.65563e-05	0.00186332	3.20921	Down		12
TC1100009521.hg.1	APLP2	amyloid beta precursor like protein 2	-1.94	7.87897	-8.95176	2.91028e-05	0.00188708	3.11788	Down		12
TC0X00009493.hg.1	EFHC2	EF-hand domain containing 2	-2.02682	5.10618	-8.87669	3.08479e-05	0.00191291	3.05967	Down		12
TC0500009378.hg.1	DOCK2	dedicator of cytokinesis 2	-1.81426	6.55606	-8.84527	3.16131e-05	0.00191634	3.03516	Down		12
TC0200007533.hg.1	FOXN2	forkhead box N2	-2.23081	7.03766	-8.78846	3.30508e-05	0.00192547	2.99062	Down		12
TC0100015049.hg.1	FRRS1	ferric chelate reductase 1	-2.01529	6.34601	-8.74372	3.4235e-05	0.00193574	2.95533	Down		12
TC0200012489.hg.1	PIGF	phosphatidylinositol glycan anchor biosynthesis class F	-1.93696	4.96562	-8.70601	3.52702e-05	0.00193732	2.92545	Down		12
TC0600014371.hg.1	RNASET2	ribonuclease T2	-1.7469	7.40168	-8.61835	3.78146e-05	0.00197512	2.85548	Down		12
TC0X00008235.hg.1	LONRF3	LON peptidase N-terminal domain and ring finger 3	-1.96475	5.05535	-8.60352	3.82654e-05	0.00197995	2.84356	Down		12
TC0100016833.hg.1	ZBTB41	zinc finger and BTB domain containing 41	-3.27468	4.51644	-8.45942	4.2971e-05	0.00202747	2.72676	Down		12
TC1200007061.hg.1	CMAS	cytidine monophosphate N-acetylneuraminic acid synthetase	-2.41146	6.53359	-8.40988	4.4736e-05	0.00205077	2.68615	Down		12
TC1700008452.hg.1	GDPD1	glycerophosphodiester phosphodiesterase domain containing 1	-1.70269	4.93683	-8.32643	4.78963e-05	0.00209393	2.6172	Down		12
TC0900007844.hg.1	SPIN1	spindlin 1	-1.67048	6.59949	-8.31205	4.84655e-05	0.00209884	2.60525	Down		12
TC1000011948.hg.1	PDZD8	PDZ domain containing 8	-2.29437	6.69217	-8.3071	4.86632e-05	0.00209884	2.60114	Down		12
TC1400007172.hg.1	STYX	serine/threonine/tyrosine interacting protein	-2.35862	6.61875	-8.1399	5.59059e-05	0.00217995	2.4606	Down		12
TC0300013834.hg.1	RAD54L2	RAD54 like 2	-1.96459	4.5327	-8.05079	6.02538e-05	0.00224471	2.38456	Down		12
TC1000010065.hg.1	ARHGAP21	Rho GTPase activating protein 21	-1.76753	4.7719	-7.99274	6.32898e-05	0.00227303	2.33459	Down		12
TC1800008474.hg.1	SLC39A6	solute carrier family 39 member 6	-1.57912	4.1043	-7.9893	6.34752e-05	0.00227546	2.33161	Down		12
TC1800007797.hg.1	ATP9B	ATPase phospholipid transporting 9B (putative)	-2.33219	4.41185	-7.9157	6.75866e-05	0.00231942	2.26774	Down		12
TC0200013298.hg.1	ST3GAL5	ST3 beta-galactoside alpha-2,3-sialyltransferase 5	-2.12042	5.71411	-7.73243	7.91844e-05	0.00248918	2.10619	Down		12
TC0500010876.hg.1	SMIM15	small integral membrane protein 15	-1.5426	6.00226	-7.58966	8.97705e-05	0.00258443	1.97784	Down		12
TC1200010481.hg.1	TWF1	twinfilin actin binding protein 1	-1.55658	5.96719	-7.50564	9.6736e-05	0.00267144	1.90126	Down		12
TC0400010626.hg.1	FRYL	FRY like transcription coactivator	-1.72714	4.71429	-7.41189	0.00010523	0.00277097	1.81489	Down		12
TC0200015431.hg.1	TMEM237	transmembrane protein 237	-1.503	6.10669	-7.38444	0.000107872	0.00279626	1.78942	Down		12
TC0800011150.hg.1	TP53INP1	tumor protein p53 inducible nuclear protein 1	-1.7449	5.01773	-7.34605	0.000111693	0.00283373	1.75365	Down		12
TC0500008702.hg.1	CAMLG	calcium modulating ligand	-1.95581	6.23769	-7.11128	0.000138623	0.00308769	1.5312	Down		12
TC1000008046.hg.1	FUT11	fucosyltransferase 11	-1.61145	7.05734	-7.05132	0.000146616	0.00316028	1.47334	Down		12
TC0100016839.hg.1	DENND1B	DENN domain containing 1B	-2.35872	3.91465	-6.96157	0.000159557	0.00328591	1.38595	Down		12
TC0200008930.hg.1	SLC20A1	solute carrier family 20 member 1	-1.88238	6.64736	-6.95231	0.000160964	0.00329923	1.37687	Down		12
TC0100014910.hg.1	TGFBR3	transforming growth factor beta receptor 3	-1.50278	6.35541	-6.87322	0.000173554	0.00339813	1.29897	Down		12
TC0X00006603.hg.1	HCCS	holocytochrome c synthase	-1.82589	6.2217	-6.79347	0.000187371	0.00352435	1.21964	Down		12
TC1100010400.hg.1	LGR4	leucine rich repeat containing G protein-coupled receptor 4	-1.95379	4.66696	-6.79347	0.000187372	0.00352435	1.21963	Down		12
TC1500010740.hg.1	DTWD1	DTW domain containing 1	-1.73634	4.28171	-6.7057	0.000204014	0.00366346	1.13141	Down		12
TC1500008470.hg.1	ARRDC4	arrestin domain containing 4	-1.83944	6.25698	-6.65015	0.000215397	0.00379366	1.07507	Down		12
TC0800008314.hg.1	MTDH	metadherin	-1.51589	9.20218	-6.64658	0.000216152	0.00379902	1.07144	Down		12
TC0100009064.hg.1	FNBP1L	formin binding protein 1 like	-1.52806	4.97486	-6.60966	0.000224139	0.00387671	1.03376	Down		12
TC0600014328.hg.1	OSTM1	osteoclastogenesis associated transmembrane protein 1	-2.01724	3.49865	-6.4188	0.000271037	0.00425678	0.836213	Down		12
TC0400008557.hg.1	USP53	ubiquitin specific peptidase 53	-1.96666	4.97762	-6.21958	0.000331957	0.00478094	0.624925	Down		12
TC0800010553.hg.1	NSMAF	neutral sphingomyelinase activation associated factor	-1.81203	6.99151	-6.18903	0.00034258	0.00487289	0.592059	Down		12
TC0600009364.hg.1	NCOA7	nuclear receptor coactivator 7	-1.67391	5.2534	-6.16648	0.000350663	0.00494035	0.567719	Down		12
TC1400010765.hg.1	RDH11	retinol dehydrogenase 11	-1.9093	6.7233	-6.08158	0.000383057	0.00518368	0.475452	Down		12
TC1200007170.hg.1	CCDC91	coiled-coil domain containing 91	-1.50591	6.98958	-6.07643	0.000385128	0.0052062	0.469818	Down		12
TC1400009337.hg.1	DHRS7	dehydrogenase/reductase 7	-1.74957	5.3889	-6.01442	0.000411044	0.00541062	0.401762	Down		12
TC0200012320.hg.1	MAP4K3	mitogen-activated protein kinase kinase kinase kinase 3	-1.66571	6.44268	-5.78433	0.000525569	0.00625438	0.14457	Down		12
TC1200008734.hg.1	RIC8B	RIC8 guanine nucleotide exchange factor B	-1.87307	4.19603	-5.74586	0.00054797	0.00641718	0.100843	Down		12
TC2100007278.hg.1	PKNOX1	PBX/knotted 1 homeobox 1	-1.51194	5.0569	-5.12806	0.00110013	0.00978463	-0.630865	Down		12
TC0500011208.hg.1	WDR41	WD repeat domain 41	-2.07539	6.33146	-10.431	9.98728e-06	0.00174206	4.16942	Down		10
TC0900009346.hg.1	CBWD1	COBW domain containing 1	-2.23697	6.5505	-10.16	1.20242e-05	0.00174206	3.98949	Down		10
TC0800008120.hg.1	LRRCC1	leucine rich repeat and coiled-coil centrosomal protein 1	-2.01547	5.67081	-10.1557	1.206e-05	0.00174206	3.98659	Down		10
TC1800008965.hg.1	TMX3	thioredoxin related transmembrane protein 3	-2.4138	4.50672	-9.97879	1.36462e-05	0.00174206	3.86616	Down		10
TC1000009111.hg.1	WDR11	WD repeat domain 11	-2.18286	4.48526	-9.90474	1.43789e-05	0.00174206	3.81504	Down		10
TC0300013962.hg.1	ANO10	anoctamin 10	-2.12548	7.51864	-9.87434	1.46923e-05	0.00174206	3.79394	Down		10
TC0200007746.hg.1	B3GNT2	UDP-GlcNAc:betaGal beta-1,3-N-acetylglucosaminyltransferase 2	-2.74493	6.04688	-9.80635	1.54215e-05	0.00174206	3.74648	Down		10
TC0800008150.hg.1	CPNE3	copine 3	-2.1917	5.54249	-9.64111	1.73698e-05	0.00174206	3.62962	Down		10
TC0300007189.hg.1	SNRK	SNF related kinase	-1.87753	4.42688	-9.47231	1.96505e-05	0.00174206	3.50798	Down		10
TC1500009358.hg.1	SECISBP2L	SECIS binding protein 2 like	-2.92399	5.55394	-9.38469	2.09659e-05	0.00176109	3.44392	Down		10
TC0300013921.hg.1	PIGX	phosphatidylinositol glycan anchor biosynthesis class X	-1.90823	5.45183	-9.03812	2.72309e-05	0.00187589	3.18421	Down		10
TC1600007169.hg.1	METTL9	methyltransferase like 9	-1.82428	8.3535	-8.77994	3.32727e-05	0.00192848	2.98392	Down		10
TC0100011736.hg.1	DEGS1	delta 4-desaturase, sphingolipid 1	-2.25953	4.86386	-8.70866	3.51963e-05	0.00193732	2.92755	Down		10
TC0700006977.hg.1	NFE2L3	nuclear factor, erythroid 2 like 3	-1.74832	4.52447	-8.63746	3.7243e-05	0.00197512	2.87079	Down		10
TC0200016720.hg.1	RNF149	ring finger protein 149	-1.84416	3.68079	-8.62223	3.76979e-05	0.00197512	2.85858	Down		10
TC0700011710.hg.1	SLC25A40	solute carrier family 25 member 40	-2.03316	5.72475	-8.43147	4.3957e-05	0.00203801	2.70388	Down		10
TC0900007604.hg.1	OSTF1	osteoclast stimulating factor 1	-1.76092	8.16266	-8.34427	4.72001e-05	0.00208661	2.632	Down		10
TC1200007892.hg.1	ARHGEF25	Rho guanine nucleotide exchange factor 25	-1.97208	3.57322	-8.21486	5.25192e-05	0.00213526	2.52395	Down		10
TC1100012186.hg.1	MSANTD4	Myb/SANT DNA binding domain containing 4 with coiled-coils	-1.6047	5.02449	-8.11668	5.70036e-05	0.00219578	2.44087	Down		10
TC1200010516.hg.1	SLC38A1	solute carrier family 38 member 1	-1.78946	6.4929	-7.99794	6.30107e-05	0.00227246	2.33908	Down		10
TC1500009189.hg.1	ZNF106	zinc finger protein 106	-2.08507	6.71173	-7.9347	6.64972e-05	0.00230389	2.28428	Down		10
TC0900011148.hg.1	CTNNAL1	catenin alpha like 1	-1.76448	6.86558	-7.89935	6.854e-05	0.00234451	2.25347	Down		10
TC1200007418.hg.1	ANO6	anoctamin 6	-1.5977	6.90684	-7.85354	7.12926e-05	0.00238307	2.21334	Down		10
TC0300009282.hg.1	TIPARP	TCDD inducible poly(ADP-ribose) polymerase	-1.79887	6.93565	-7.78065	7.59312e-05	0.0024374	2.14903	Down		10
TC0200016740.hg.1	ARL5A	ADP ribosylation factor like GTPase 5A	-1.57238	7.11914	-7.78013	7.59652e-05	0.0024374	2.14857	Down		10
TC0800011021.hg.1	RMDN1	regulator of microtubule dynamics 1	-1.57456	5.98572	-7.74458	7.83502e-05	0.00248008	2.11701	Down		10
TC0300012157.hg.1	RABL3	RAB, member of RAS oncogene family like 3	-1.54483	3.68101	-7.72365	7.97935e-05	0.00249611	2.09836	Down		10
TC0100014250.hg.1	TMEM59	transmembrane protein 59	-1.60811	8.48237	-7.54079	9.37508e-05	0.00263595	1.93339	Down		10
TC0100013588.hg.1	PTP4A2	protein tyrosine phosphatase 4A2	-1.66073	9.00919	-7.5242	9.51462e-05	0.00265455	1.91825	Down		10
TC1700012446.hg.1	CCDC47	coiled-coil domain containing 47	-1.90185	8.34657	-7.517	9.57596e-05	0.00266475	1.91166	Down		10
TC2200006521.hg.1	BCL2L13	BCL2 like 13	-1.60454	6.40608	-7.49837	9.73663e-05	0.00268032	1.8946	Down		10
TC0X00011248.hg.1	TMLHE	trimethyllysine hydroxylase, epsilon	-1.7054	5.4877	-7.4946	9.76949e-05	0.00268466	1.89115	Down		10
TC0400008074.hg.1	NUDT9	nudix hydrolase 9	-1.73771	4.77961	-7.29932	0.00011655	0.00288682	1.70987	Down		10
TC0100018233.hg.1	FPGT	fucose-1-phosphate guanylyltransferase	-1.61804	4.84928	-7.24874	0.000122073	0.00294906	1.66222	Down		10
TC0800010417.hg.1	PCMTD1	protein-L-isoaspartate (D-aspartate) O-methyltransferase domain containing 1	-1.68768	6.27439	-7.14653	0.000134152	0.00305552	1.56501	Down		10
TC0200009902.hg.1	NOSTRIN	nitric oxide synthase trafficking	-1.71529	5.68828	-7.08292	0.000142342	0.00312748	1.50388	Down		10
TC0800006864.hg.1	ZDHHC2	zinc finger DHHC-type palmitoyltransferase 2	-1.54054	6.53753	-7.02423	0.000150394	0.00320242	1.44707	Down		10
TC0900010404.hg.1	ZFAND5	zinc finger AN1-type containing 5	-1.60698	7.01146	-7.00336	0.00015338	0.0032288	1.42676	Down		10
TC0200013772.hg.1	RGPD3	RANBP2 like and GRIP domain containing 3	-1.74769	4.13979	-6.87284	0.000173617	0.00339813	1.29859	Down		10
TC0X00010919.hg.1	CT45A10	cancer/testis antigen family 45 member A10	-1.55744	7.47947	-6.83759	0.000179582	0.00345415	1.26362	Down		10
TC0X00010836.hg.1	RAP2C	RAP2C, member of RAS oncogene family	-1.60955	6.71657	-6.75707	0.000194082	0.00359426	1.18317	Down		10
TC1300008229.hg.1	ZMYM5	zinc finger MYM-type containing 5	-1.57472	5.71575	-6.75127	0.000195176	0.00360562	1.17734	Down		10
TC1800007326.hg.1	ME2	malic enzyme 2	-1.86914	7.73298	-6.73729	0.000197842	0.00361953	1.16327	Down		10
TC1600008568.hg.1	ATMIN	ATM interactor	-1.88932	5.63866	-6.69834	0.000205484	0.0036814	1.12396	Down		10
TC0X00011001.hg.1	MAGEC2	MAGE family member C2	-1.80064	6.1698	-6.56222	0.000234887	0.00396921	0.985102	Down		10
TC1100008673.hg.1	TMEM135	transmembrane protein 135	-1.79148	5.60576	-6.34955	0.000290676	0.00443699	0.763367	Down		10
TC1300009505.hg.1	ABCC4	ATP binding cassette subfamily C member 4	-2.17467	6.76674	-6.25287	0.000320796	0.00468744	0.660598	Down		10
TC0100017060.hg.1	DSTYK	dual serine/threonine and tyrosine protein kinase	-1.65379	5.11086	-6.03454	0.000402426	0.00532788	0.423908	Down		10
TC1000006880.hg.1	PTER	phosphotriesterase related	-2.01174	3.75964	-5.71248	0.000568267	0.0065483	0.0627312	Down		10
TC0400008947.hg.1	TMEM184C	transmembrane protein 184C	-1.52041	5.69334	-5.64093	0.000614641	0.00686992	-0.0195049	Down		10
TC1500007520.hg.1	APH1B	aph-1 homolog B, gamma-secretase subunit	-1.57147	4.30418	-5.50372	0.000715749	0.00752846	-0.179269	Down		10
TC1700007638.hg.1	GGNBP2	gametogenetin binding protein 2	-1.52713	6.79446	-5.4502	0.000760073	0.00779829	-0.242341	Down		10
TC0800006447.hg.1	FBXO25	F-box protein 25	-1.53906	3.68105	-5.2654	0.000938055	0.00884437	-0.463336	Down		10
TC1200010397.hg.1	CPNE8	copine 8	-1.59927	6.12965	-5.23835	0.000967769	0.00903307	-0.496109	Down		10
TC1800008162.hg.1	FAM210A	family with sequence similarity 210 member A	-1.7083	6.00949	-4.9835	0.00130478	0.0109118	-0.810283	Down		10
TC0600008780.hg.1	CASP8AP2	caspase 8 associated protein 2	-2.51984	4.21903	-12.4118	2.89375e-06	0.00174206	5.33769	Down		8
TC0100015550.hg.1	FAM72C	family with sequence similarity 72 member C	-2.52638	7.58445	-10.5347	9.31324e-06	0.00174206	4.23686	Down		8
TC0600011162.hg.1	ZNF322	zinc finger protein 322	-3.23177	3.94489	-10.5014	9.52411e-06	0.00174206	4.21527	Down		8
TC1300007731.hg.1	GPR180	G protein-coupled receptor 180	-2.47063	3.67838	-10.3756	1.03702e-05	0.00174206	4.13304	Down		8
TC0500011408.hg.1	TMEM161B	transmembrane protein 161B	-2.09128	6.07568	-10.3668	1.04326e-05	0.00174206	4.12724	Down		8
TC0200016624.hg.1	KIDINS220	kinase D interacting substrate 220	-2.25074	5.90109	-9.91591	1.42655e-05	0.00174206	3.82278	Down		8
TC0100012278.hg.1	SCCPDH	saccharopine dehydrogenase (putative)	-2.25698	7.11427	-9.5414	1.86787e-05	0.00174206	3.55805	Down		8
TC0800008295.hg.1	PTDSS1	phosphatidylserine synthase 1	-2.06947	6.76066	-9.43327	2.02248e-05	0.00174206	3.47952	Down		8
TC0100015752.hg.1	CTSS	cathepsin S	-2.75009	4.90387	-9.23875	2.33821e-05	0.0017916	3.33581	Down		8
TC0X00006789.hg.1	FAM3C	FAM3 metabolism regulating signaling molecule C	-1.827	4.9887	-9.19665	2.41362e-05	0.00180035	3.30428	Down		8
TC0100015397.hg.1	CD58	CD58 molecule	-2.40641	3.9941	-9.12686	2.54471e-05	0.00182295	3.25169	Down		8
TC0300007055.hg.1	CTDSPL	CTD small phosphatase like	-2.00859	5.44031	-8.97734	2.85337e-05	0.00188708	3.13759	Down		8
TC0100011695.hg.1	BROX	BRO1 domain and CAAX motif containing	-2.06528	6.74396	-8.5954	3.85145e-05	0.00198014	2.83703	Down		8
TC0500013399.hg.1	PANK3	pantothenate kinase 3	-1.6788	6.41388	-8.51887	4.09553e-05	0.00199994	2.77519	Down		8
TC1500010106.hg.1	TSPAN3	tetraspanin 3	-1.90747	6.96968	-8.50275	4.1491e-05	0.00200215	2.7621	Down		8
TC0100017722.hg.1	C1orf131	chromosome 1 open reading frame 131	-2.08714	3.25779	-8.48722	4.2015e-05	0.00200215	2.74945	Down		8
TC1700007138.hg.1	TVP23B	trans-golgi network vesicle protein 23 homolog B	-1.76359	6.44117	-8.39663	4.5222e-05	0.00206107	2.67524	Down		8
TC0200013515.hg.1	STARD7	StAR related lipid transfer domain containing 7	-1.71962	7.39466	-8.0432	6.06414e-05	0.00224471	2.37805	Down		8
TC0700008292.hg.1	STEAP1	STEAP family member 1	-1.61504	3.95943	-7.95569	6.53166e-05	0.00228487	2.30252	Down		8
TC1700012309.hg.1	METTL23	methyltransferase like 23	-1.64443	5.52831	-7.93583	6.64333e-05	0.00230352	2.28526	Down		8
TC1100012976.hg.1	NUCB2	nucleobindin 2	-1.62454	8.70456	-7.9214	6.72579e-05	0.0023118	2.2727	Down		8
TC1300008137.hg.1	TMCO3	transmembrane and coiled-coil domains 3	-2.45895	5.25	-7.8452	7.18067e-05	0.00239261	2.20601	Down		8
TC0600014361.hg.1	CNKSR3	CNKSR family member 3	-1.85807	4.83418	-7.81987	7.33946e-05	0.00241197	2.1837	Down		8
TC0100015975.hg.1	RIT1	Ras like without CAAX 1	-1.56587	5.74054	-7.79022	7.53028e-05	0.00243408	2.15751	Down		8
TC0100016035.hg.1	ETV3	ETS variant transcription factor 3	-1.69736	6.37968	-7.68861	8.22776e-05	0.00252707	2.06702	Down		8
TC0300009600.hg.1	ZNF639	zinc finger protein 639	-2.34972	6.45617	-7.67049	8.35954e-05	0.00252763	2.05077	Down		8
TC0300013896.hg.1	MFSD1	major facilitator superfamily domain containing 1	-1.82881	4.692	-7.64228	8.56949e-05	0.00255049	2.0254	Down		8
TC0200008806.hg.1	LIMS1	LIM zinc finger domain containing 1	-1.54798	6.43186	-7.60822	8.83091e-05	0.00257207	1.99465	Down		8
TC0700008517.hg.1	ZKSCAN1	zinc finger with KRAB and SCAN domains 1	-2.09451	6.25116	-7.55186	9.28323e-05	0.00262543	1.94348	Down		8
TC0100011543.hg.1	TATDN3	TatD DNase domain containing 3	-1.74307	6.07839	-7.51488	9.59412e-05	0.00266475	1.90972	Down		8
TC1200007626.hg.1	METTL7A	methyltransferase like 7A	-1.96052	6.75584	-7.48334	9.8684e-05	0.00269383	1.88081	Down		8
TC0100010379.hg.1	UHMK1	U2AF homology motif kinase 1	-2.31802	7.227	-7.42357	0.000104127	0.00276476	1.82571	Down		8
TC1900008498.hg.1	NUCB1	nucleobindin 1	-1.7576	8.17093	-7.33002	0.000113333	0.00285589	1.73866	Down		8
TC2100007072.hg.1	TTC3	tetratricopeptide repeat domain 3	-1.98882	7.12153	-7.22557	0.000124702	0.00296376	1.64028	Down		8
TC0900010390.hg.1	ABHD17B	abhydrolase domain containing 17B, depalmitoylase	-1.85232	5.13795	-7.20262	0.000127367	0.00298509	1.61851	Down		8
TC1000010844.hg.1	RUFY2	RUN and FYVE domain containing 2	-1.65596	5.66455	-7.18348	0.000129638	0.00301923	1.60029	Down		8
TC2200008477.hg.1	PATZ1	POZ/BTB and AT hook containing zinc finger 1	-1.80207	4.29001	-7.17164	0.000131066	0.00303294	1.589	Down	TSG, fusion	8
TC1100010051.hg.1	TMEM9B	TMEM9 domain family member B	-1.58389	4.88647	-7.13613	0.000135455	0.0030659	1.55504	Down		8
TC0200007954.hg.1	PCYOX1	prenylcysteine oxidase 1	-2.25195	6.05544	-7.12671	0.000136646	0.00307752	1.54601	Down		8
TC1600010174.hg.1	MYLK3	myosin light chain kinase 3	-1.94394	5.75283	-7.02916	0.000149698	0.00319692	1.45185	Down		8
TC0700012427.hg.1	FAM3C	FAM3 metabolism regulating signaling molecule C	-1.67374	6.36229	-6.92001	0.000165978	0.00333495	1.34515	Down		8
TC0200010966.hg.1	RHBDD1	rhomboid domain containing 1	-1.7072	5.30014	-6.71777	0.000201631	0.00364704	1.1436	Down		8
TC0100011064.hg.1	CFH	complement factor H	-1.52207	6.69636	-6.48084	0.000254691	0.00413951	0.900942	Down		8
TC1200012666.hg.1	TMEM19	transmembrane protein 19	-2.02272	3.8641	-6.43307	0.000267175	0.00423771	0.85115	Down		8
TC0400009458.hg.1	CDKN2AIP	CDKN2A interacting protein	-1.84618	4.72145	-6.42456	0.00026947	0.00425234	0.842248	Down		8
TC0900010937.hg.1	ZNF322	zinc finger protein 322	-1.66038	4.7049	-6.40215	0.00027562	0.00430712	0.818755	Down		8
TC1900007744.hg.1	DPY19L3	dpy-19 like C-mannosyltransferase 3	-2.60565	4.4307	-6.22826	0.000329003	0.00475827	0.634248	Down		8
TC0400008609.hg.1	KIAA1109	KIAA1109	-1.70911	4.74197	-6.1513	0.000356224	0.00498986	0.551296	Down		8
TC1600010756.hg.1	ST3GAL2	ST3 beta-galactoside alpha-2,3-sialyltransferase 2	-1.90368	4.44827	-6.14185	0.000359735	0.00501987	0.541055	Down		8
TC0700008928.hg.1	CPED1	cadherin like and PC-esterase domain containing 1	-1.51905	7.47495	-6.07412	0.000386059	0.00521183	0.467297	Down		8
TC0100009324.hg.1	FAM102B	family with sequence similarity 102 member B	-2.27796	8.18026	-6.06922	0.000388044	0.00522349	0.461938	Down		8
TC0100012816.hg.1	CLSTN1	calsyntenin 1	-1.60516	6.79175	-6.06556	0.000389536	0.0052306	0.457928	Down		8
TC0600007257.hg.1	TRIM38	tripartite motif containing 38	-1.7731	4.47272	-5.88723	0.000470477	0.00583987	0.260508	Down		8
TC0700008149.hg.1	PHTF2	putative homeodomain transcription factor 2	-1.5631	6.37891	-5.79539	0.000519319	0.00620552	0.1571	Down		8
TC1900008988.hg.1	ZNF805	zinc finger protein 805	-1.66803	3.47062	-5.77936	0.000528405	0.00626752	0.138932	Down		8
TC1700010358.hg.1	MYO1D	myosin ID	-2.0388	6.33857	-5.75771	0.000540958	0.0063677	0.114336	Down		8
TC1000011596.hg.1	DNMBP	dynamin binding protein	-1.79305	4.53087	-5.66639	0.000597675	0.00675157	0.00984182	Down		8
TC1200010693.hg.1	TFCP2	transcription factor CP2	-1.67025	5.05831	-5.53889	0.000688188	0.00734589	-0.138061	Down		8
TC1900008180.hg.1	ZNF526	zinc finger protein 526	-1.54726	4.68668	-5.42814	0.000779211	0.0078914	-0.26845	Down		8
TC0300012572.hg.1	CEP70	centrosomal protein 70	-1.94747	6.36422	-5.41192	0.000793632	0.0079709	-0.287706	Down		8
TC0300006566.hg.1	CRELD1	cysteine rich with EGF like domains 1	-1.89869	5.43948	-4.73111	0.00177003	0.0132507	-1.13111	Down		8
TC0700012293.hg.1	TMEM168	transmembrane protein 168	-2.44432	3.86856	-12.1303	3.41158e-06	0.00174206	5.186	Down		6
TC0100015160.hg.1	SLC25A24	solute carrier family 25 member 24	-2.43228	4.48047	-11.5924	4.71932e-06	0.00174206	4.88364	Down		6
TC0300010643.hg.1	CMTM6	CKLF like MARVEL transmembrane domain containing 6	-2.35329	4.17497	-11.466	5.10341e-06	0.00174206	4.81009	Down		6
TC1400006943.hg.1	MIPOL1	mirror-image polydactyly 1	-2.26101	4.30307	-11.165	6.16794e-06	0.00174206	4.63101	Down		6
TC1600007990.hg.1	RSPRY1	ring finger and SPRY domain containing 1	-3.22466	5.403	-10.7221	8.22061e-06	0.00174206	4.35688	Down		6
TC1400009131.hg.1	MAP4K5	mitogen-activated protein kinase kinase kinase kinase 5	-2.13976	6.1723	-10.5164	9.42835e-06	0.00174206	4.22502	Down		6
TC0100007943.hg.1	RLF	RLF zinc finger	-2.2585	6.45912	-10.0982	1.25513e-05	0.00174206	3.94773	Down		6
TC0100015434.hg.1	GDAP2	ganglioside induced differentiation associated protein 2	-2.19509	6.11953	-9.71073	1.65171e-05	0.00174206	3.67912	Down		6
TC0200009687.hg.1	ARL6IP6	ADP ribosylation factor like GTPase 6 interacting protein 6	-1.90185	5.91146	-9.61092	1.7755e-05	0.00174206	3.60803	Down		6
TC0600009831.hg.1	PPP1R14C	protein phosphatase 1 regulatory inhibitor subunit 14C	-2.39686	4.51865	-9.10881	2.5799e-05	0.0018291	3.23802	Down		6
TC0500013200.hg.1	RFESD	Rieske Fe-S domain containing	-1.88914	5.35772	-9.00235	2.79893e-05	0.00188676	3.15682	Down		6
TC1800007835.hg.1	ADNP2	ADNP homeobox 2	-1.94199	5.38475	-8.96014	2.8915e-05	0.00188708	3.12434	Down		6
TC1000012427.hg.1	AKR1C1	aldo-keto reductase family 1 member C1	-1.90146	5.88803	-8.9249	2.97143e-05	0.00189399	3.0971	Down		6
TC1900008989.hg.1	ZNF460	zinc finger protein 460	-1.82078	5.98667	-8.88002	3.07681e-05	0.00191291	3.06226	Down		6
TC0400007128.hg.1	TBC1D19	TBC1 domain family member 19	-1.82681	4.30425	-8.785	3.31409e-05	0.00192599	2.98789	Down		6
TC1900007917.hg.1	ZNF146	zinc finger protein 146	-1.91192	6.74703	-8.62506	3.76129e-05	0.00197512	2.86085	Down		6
TC1100012831.hg.1	ZBTB44	zinc finger and BTB domain containing 44	-1.93955	5.42535	-8.62497	3.76155e-05	0.00197512	2.86078	Down		6
TC1200010006.hg.1	PLBD1	phospholipase B domain containing 1	-1.82084	6.55589	-8.62236	3.76941e-05	0.00197512	2.85869	Down		6
TC0900012276.hg.1	SCAI	suppressor of cancer cell invasion	-2.51539	5.53155	-8.48059	4.22406e-05	0.00200629	2.74405	Down		6
TC1600010855.hg.1	GLG1	golgi glycoprotein 1	-1.85673	7.11935	-8.44214	4.35778e-05	0.00203801	2.71262	Down		6
TC0X00008734.hg.1	PASD1	PAS domain containing repressor 1	-2.35701	4.0463	-8.32842	4.78181e-05	0.00209393	2.61885	Down		6
TC0500007881.hg.1	JMY	junction mediating and regulatory protein, p53 cofactor	-1.63539	5.41836	-8.22811	5.1945e-05	0.00213526	2.53509	Down		6
TC0400011932.hg.1	ELF2	E74 like ETS transcription factor 2	-1.69697	6.26236	-8.21672	5.24382e-05	0.00213526	2.52551	Down		6
TC1900007743.hg.1	ZNF507	zinc finger protein 507	-1.83697	5.77048	-8.1786	5.41276e-05	0.00215468	2.49338	Down		6
TC0100018242.hg.1	HS2ST1	heparan sulfate 2-O-sulfotransferase 1	-2.23737	5.72533	-8.14574	5.56334e-05	0.00217561	2.46556	Down		6
TC0300010714.hg.1	TRANK1	tetratricopeptide repeat and ankyrin repeat containing 1	-1.7299	6.0226	-8.04357	6.06222e-05	0.00224471	2.37837	Down		6
TC2100006714.hg.1	NCAM2	neural cell adhesion molecule 2	-1.77145	5.45003	-8.04092	6.07583e-05	0.0022448	2.37609	Down		6
TC0800007362.hg.1	PLEKHA2	pleckstrin homology domain containing A2	-1.91151	6.18176	-7.97075	6.44845e-05	0.00227913	2.31557	Down		6
TC0300012281.hg.1	ZXDC	ZXD family zinc finger C	-1.69746	6.18762	-7.92816	6.68703e-05	0.00230671	2.27859	Down		6
TC0400007459.hg.1	OCIAD1	OCIA domain containing 1	-2.34787	7.28521	-7.82933	7.2797e-05	0.00240575	2.19204	Down		6
TC0600013001.hg.1	CEP85L	centrosomal protein 85 like	-1.87416	4.63786	-7.6033	8.8694e-05	0.00257207	1.99019	Down		6
TC0400012068.hg.1	PRMT9	protein arginine methyltransferase 9	-1.69191	3.51034	-7.54953	9.30247e-05	0.00262916	1.94136	Down		6
TC0600011880.hg.1	GTPBP2	GTP binding protein 2	-1.61552	7.51103	-7.43077	0.000103454	0.00275529	1.83237	Down		6
TC0700008870.hg.1	CAV2	caveolin 2	-1.52054	5.52937	-7.23635	0.000123471	0.00296326	1.6505	Down		6
TC0700008147.hg.1	RSBN1L	round spermatid basic protein 1 like	-2.12653	6.36501	-7.20986	0.000126519	0.00297767	1.62538	Down		6
TC0100011592.hg.1	KCTD3	potassium channel tetramerization domain containing 3	-1.92416	6.28524	-7.12646	0.000136678	0.00307752	1.54577	Down		6
TC0700008662.hg.1	ARMC10	armadillo repeat containing 10	-1.72718	6.03399	-7.06875	0.000144241	0.00314044	1.4902	Down		6
TC0100015180.hg.1	WDR47	WD repeat domain 47	-1.57761	5.56616	-7.0223	0.000150667	0.00320448	1.4452	Down		6
TC2200007672.hg.1	GRAMD4	GRAM domain containing 4	-1.82955	3.85999	-6.98539	0.000156003	0.00325596	1.40924	Down		6
TC0600013206.hg.1	SLC18B1	solute carrier family 18 member B1	-1.5074	5.93281	-6.97704	0.000157238	0.00326605	1.40108	Down		6
TC0600012299.hg.1	SLC17A5	solute carrier family 17 member 5	-1.54388	3.55972	-6.96964	0.000158343	0.00327215	1.39385	Down		6
TC0100014743.hg.1	TTLL7	tubulin tyrosine ligase like 7	-1.74454	4.15184	-6.93453	0.000163702	0.00331886	1.35943	Down		6
TC0X00007116.hg.1	RP2	RP2 activator of ARL3 GTPase	-1.56378	5.35875	-6.92991	0.000164423	0.00332199	1.35489	Down		6
TC1000008585.hg.1	MARVELD1	MARVEL domain containing 1	-1.50108	4.32323	-6.88953	0.00017087	0.0033794	1.3151	Down		6
TC1300010030.hg.1	N4BP2L2	NEDD4 binding protein 2 like 2	-1.56094	6.65165	-6.76263	0.000193039	0.00359343	1.18875	Down		6
TC1100007220.hg.1	DEPDC7	DEP domain containing 7	-1.89344	5.3598	-6.7625	0.000193065	0.00359343	1.18861	Down		6
TC0500010869.hg.1	ELOVL7	ELOVL fatty acid elongase 7	-2.07505	4.28106	-6.75958	0.000193611	0.00359343	1.18569	Down		6
TC0400007789.hg.1	RUFY3	RUN and FYVE domain containing 3	-2.03866	4.25272	-6.71813	0.00020156	0.00364704	1.14396	Down		6
TC1300009993.hg.1	BIVM	basic, immunoglobulin-like variable motif containing	-1.77409	4.82553	-6.71399	0.000202373	0.00364704	1.13979	Down		6
TC0400010612.hg.1	NFXL1	nuclear transcription factor, X-box binding like 1	-1.5202	4.06775	-6.59478	0.000227449	0.00391192	1.01853	Down		6
TC0600009080.hg.1	CEP57L1	centrosomal protein 57 like 1	-1.57244	6.5049	-6.50219	0.000249321	0.00408138	0.923107	Down		6
TC1400010777.hg.1	TC2N	tandem C2 domains, nuclear	-2.75064	5.08595	-6.47356	0.000256549	0.00415882	0.893379	Down		6
TC0600007092.hg.1	FAM8A1	family with sequence similarity 8 member A1	-1.67202	6.39146	-6.47165	0.000257039	0.00416091	0.891393	Down		6
TC1700008328.hg.1	STXBP4	syntaxin binding protein 4	-1.88002	3.92116	-6.33291	0.000295627	0.00447169	0.74577	Down		6
TC0300011276.hg.1	DENND6A	DENN domain containing 6A	-1.77883	4.63813	-6.31527	0.000300981	0.00452375	0.727067	Down		6
TC1500010727.hg.1	CCNDBP1	cyclin D1 binding protein 1	-1.5493	7.33437	-6.28368	0.000310836	0.00460076	0.693482	Down		6
TC0100008978.hg.1	LRRC8B	leucine rich repeat containing 8 VRAC subunit B	-1.50309	6.64583	-6.19141	0.000341738	0.00486969	0.594625	Down		6
TC1500009005.hg.1	ZNF770	zinc finger protein 770	-1.6047	4.68841	-6.15841	0.000353608	0.00496309	0.558989	Down		6
TC0100008955.hg.1	PKN2	protein kinase N2	-1.56277	6.58467	-6.0603	0.000391688	0.00524328	0.452172	Down		6
TC0200011885.hg.1	TTC32	tetratricopeptide repeat domain 32	-1.59051	4.86195	-5.85232	0.000488413	0.00599293	0.221346	Down		6
TC1500009623.hg.1	BNIP2	BCL2 interacting protein 2	-1.79159	4.45198	-5.84229	0.00049371	0.00603681	0.210054	Down		6
TC0900010586.hg.1	C9orf64	chromosome 9 open reading frame 64	-1.52006	5.98102	-5.80604	0.000513372	0.00618211	0.169162	Down		6
TC0700011799.hg.1	HEPACAM2	HEPACAM family member 2	-1.6744	5.42139	-5.72608	0.000559897	0.00648512	0.0782813	Down		6
TC1400010624.hg.1	PTGR2	prostaglandin reductase 2	-2.2079	5.72521	-5.51533	0.000706522	0.00746448	-0.165652	Down		6
TC2200009244.hg.1	CCDC117	coiled-coil domain containing 117	-1.62772	5.17598	-5.38948	0.00081406	0.0080888	-0.314394	Down		6
TC2000009180.hg.1	OSER1	oxidative stress responsive serine rich 1	-1.56049	5.92781	-4.79185	0.00164341	0.0125775	-1.05302	Down		6
TC0800008266.hg.1	DPY19L4	dpy-19 like 4	-2.69434	5.20745	-11.565	4.79959e-06	0.00174206	4.86781	Down		4
TC0700010716.hg.1	DPY19L1	dpy-19 like C-mannosyltransferase 1	-2.6727	4.78273	-11.176	6.12474e-06	0.00174206	4.63768	Down		4
TC0600014332.hg.1	ZBTB24	zinc finger and BTB domain containing 24	-2.14572	3.80099	-10.8435	7.59023e-06	0.00174206	4.43331	Down		4
TC0200007399.hg.1	PLEKHH2	pleckstrin homology, MyTH4 and FERM domain containing H2	-2.30612	4.36849	-10.7612	8.01143e-06	0.00174206	4.38159	Down		4
TC0700007345.hg.1	STK17A	serine/threonine kinase 17a	-2.71879	4.92607	-10.4931	9.57727e-06	0.00174206	4.2099	Down		4
TC0900009470.hg.1	ERMP1	endoplasmic reticulum metallopeptidase 1	-2.21768	6.01436	-10.1491	1.21157e-05	0.00174206	3.98212	Down		4
TC0300011757.hg.1	PROS1	protein S	-2.8315	4.71762	-9.94672	1.39582e-05	0.00174206	3.84408	Down		4
TC0400008841.hg.1	ELMOD2	ELMO domain containing 2	-2.09477	4.82036	-9.60018	1.78942e-05	0.00174206	3.60033	Down		4
TC0400008834.hg.1	SCOC	short coiled-coil protein	-2.21526	5.46754	-9.39089	2.08696e-05	0.00176109	3.44847	Down		4
TC0200010362.hg.1	COQ10B	coenzyme Q10B	-2.17527	6.15937	-9.04808	2.7024e-05	0.00187491	3.19182	Down		4
TC1500008982.hg.1	KATNBL1	katanin regulatory subunit B1 like 1	-2.01047	4.63964	-8.84296	3.167e-05	0.00191634	3.03336	Down		4
TC1100010156.hg.1	BTBD10	BTB domain containing 10	-1.95268	4.5692	-8.82761	3.20523e-05	0.00191652	3.02135	Down		4
TC0900012202.hg.1	KIAA2026	KIAA2026	-1.80073	3.62976	-8.65213	3.68104e-05	0.00197512	2.88253	Down		4
TC1600011075.hg.1	ZDHHC7	zinc finger DHHC-type palmitoyltransferase 7	-1.78672	6.47219	-8.61922	3.77885e-05	0.00197512	2.85617	Down		4
TC0200016669.hg.1	ASB3	ankyrin repeat and SOCS box containing 3	-1.95716	5.80958	-8.45056	4.3281e-05	0.00203346	2.71952	Down		4
TC1600007557.hg.1	ZNF267	zinc finger protein 267	-1.68075	6.46317	-8.32993	4.77586e-05	0.00209393	2.62011	Down		4
TC1000007333.hg.1	ZNF33A	zinc finger protein 33A	-1.89715	4.88822	-8.26341	5.04488e-05	0.00211548	2.56468	Down		4
TC0400011144.hg.1	ANTXR2	ANTXR cell adhesion molecule 2	-1.63958	5.75281	-8.19592	5.33528e-05	0.00214856	2.508	Down		4
TC0900010019.hg.1	ZBTB5	zinc finger and BTB domain containing 5	-1.7539	4.79404	-8.18803	5.3704e-05	0.00214962	2.50135	Down		4
TC0400012251.hg.1	C4orf46	chromosome 4 open reading frame 46	-1.81714	6.04039	-7.92834	6.68599e-05	0.00230671	2.27874	Down		4
TC1000011969.hg.1	FAM204A	family with sequence similarity 204 member A	-1.96677	5.45276	-7.7807	7.59279e-05	0.0024374	2.14907	Down		4
TC0300010891.hg.1	ZNF852	zinc finger protein 852	-1.67945	4.14992	-7.57454	9.09817e-05	0.0025963	1.96411	Down		4
TC0800007957.hg.1	RDH10	retinol dehydrogenase 10	-1.6214	5.49746	-7.56545	9.17184e-05	0.00260581	1.95585	Down		4
TC1700012120.hg.1	OGFOD3	2-oxoglutarate and iron dependent oxygenase domain containing 3	-1.51121	6.04575	-7.47901	9.90676e-05	0.00269563	1.87683	Down		4
TC0600012550.hg.1	LYRM2	LYR motif containing 2	-1.77367	4.67303	-7.37592	0.000108708	0.00280306	1.78149	Down		4
TC0300012935.hg.1	SHOX2	short stature homeobox 2	-1.53069	5.68446	-7.3693	0.000109361	0.00281089	1.77533	Down		4
TC1900006646.hg.1	GIPC3	GIPC PDZ domain containing family member 3	-1.77618	4.4714	-7.34419	0.000111882	0.00283373	1.75191	Down		4
TC0900010580.hg.1	GKAP1	G kinase anchoring protein 1	-1.60976	4.3461	-7.31275	0.00011513	0.00287904	1.72248	Down		4
TC0700013605.hg.1	PNPLA8	patatin like phospholipase domain containing 8	-1.84645	4.92728	-7.23387	0.000123753	0.00296326	1.64815	Down		4
TC0400009855.hg.1	TMEM128	transmembrane protein 128	-1.85945	4.76033	-7.15621	0.000132954	0.00304931	1.57426	Down		4
TC1200008508.hg.1	VEZT	vezatin, adherens junctions transmembrane protein	-1.68226	5.28013	-7.08248	0.0001424	0.00312748	1.50346	Down		4
TC1600006870.hg.1	ATF7IP2	activating transcription factor 7 interacting protein 2	-1.56466	4.14403	-7.0272	0.000149974	0.00319935	1.44995	Down		4
TC2200006950.hg.1	SRRD	SRR1 domain containing	-1.92957	3.61296	-6.89382	0.000170172	0.00337556	1.31933	Down		4
TC1400006828.hg.1	COCH	cochlin	-1.53992	5.42101	-6.80353	0.000185563	0.00350627	1.22969	Down		4
TC1900012021.hg.1	ZNF841	zinc finger protein 841	-1.53643	4.56868	-6.56972	0.00023315	0.00395355	0.992815	Down		4
TC0800008550.hg.1	EBAG9	estrogen receptor binding site associated antigen 9	-1.70964	8.10758	-5.95265	0.000438795	0.00559612	0.333447	Down		4
TC0300008017.hg.1	ZNF654	zinc finger protein 654	-2.38687	3.8595	-5.65127	0.000607689	0.00682561	-0.00757822	Down		4
TC0700009604.hg.1	ZNF398	zinc finger protein 398	-1.77929	4.38698	-5.55772	0.000673915	0.00725235	-0.116071	Down		4
TC0X00011221.hg.1	GAB3	GRB2 associated binding protein 3	-1.54687	6.98625	-5.43205	0.000775784	0.00787784	-0.263821	Down		4
TC1200012819.hg.1	TMBIM4	transmembrane BAX inhibitor motif containing 4	-1.509	5.33041	-5.3194	0.000881702	0.00848325	-0.398238	Down		4
TC0900008793.hg.1	ZBTB34	zinc finger and BTB domain containing 34	-1.56617	5.11526	-5.16596	0.00105252	0.00950133	-0.584349	Down		4
TC0300011182.hg.1	GLT8D1	glycosyltransferase 8 domain containing 1	-1.6429	6.25892	-4.98589	0.00130106	0.0108894	-0.807283	Down		4
TC0700010443.hg.1	STEAP1B	STEAP family member 1B	-1.85867	4.97668	-9.41658	2.0476e-05	0.00175673	3.46731	Down		2
TC0100018091.hg.1	ZNF124	zinc finger protein 124	-1.71265	6.63454	-8.691	3.56919e-05	0.0019416	2.91352	Down		2
TC0300009147.hg.1	RNF13	ring finger protein 13	-1.71959	6.75372	-8.58379	3.88741e-05	0.00198229	2.82769	Down		2
TC1400010022.hg.1	BTBD7	BTB domain containing 7	-1.80195	4.79602	-8.49265	4.18308e-05	0.00200215	2.75387	Down		2
TC0X00010406.hg.1	TCEAL8	transcription elongation factor A like 8	-1.6996	5.6291	-8.43342	4.38874e-05	0.00203801	2.70548	Down		2
TC1900007963.hg.1	ZNF383	zinc finger protein 383	-1.82927	3.37706	-8.30414	4.87822e-05	0.00209884	2.59867	Down		2
TC0100008369.hg.1	LRRC42	leucine rich repeat containing 42	-1.73431	6.92383	-8.1679	5.46129e-05	0.00216313	2.48433	Down		2
TC0100018562.hg.1	AIDA	axin interactor, dorsalization associated	-1.71527	7.21894	-8.14237	5.57901e-05	0.00217802	2.4627	Down		2
TC1100010274.hg.1	SPTY2D1	SPT2 chromatin protein domain containing 1	-1.65641	5.22362	-8.05114	6.02361e-05	0.00224471	2.38486	Down		2
TC1900012025.hg.1	ZNF28	zinc finger protein 28	-1.85644	4.22032	-7.97942	6.40105e-05	0.00227586	2.32307	Down		2
TC1900010047.hg.1	NR2C2AP	nuclear receptor 2C2 associated protein	-1.55809	4.16102	-7.82505	7.3067e-05	0.00240849	2.18827	Down		2
TC0700013548.hg.1	URGCP	upregulator of cell proliferation	-2.35359	5.3901	-7.62159	8.72721e-05	0.00256163	2.00674	Down		2
TC1900011821.hg.1	ZNF776	zinc finger protein 776	-1.92155	4.03614	-7.44862	0.000101806	0.00273177	1.84885	Down		2
TC1300010031.hg.1	CCDC169-SOHLH2	CCDC169-SOHLH2 readthrough	-1.84298	5.14026	-7.22974	0.000124224	0.00296376	1.64424	Down		2
TC1600009722.hg.1	USP31	ubiquitin specific peptidase 31	-1.58721	3.52262	-7.12857	0.00013641	0.00307752	1.5478	Down		2
TC0700013396.hg.1	CLDN12	claudin 12	-1.67373	3.60387	-7.10054	0.000140018	0.00310597	1.52087	Down		2
TC1900011667.hg.1	ZNF700	zinc finger protein 700	-1.87276	4.96804	-6.94007	0.000162844	0.00331584	1.36487	Down		2
TC0100014566.hg.1	ANKRD13C	ankyrin repeat domain 13C	-1.72521	4.43282	-6.89774	0.000169536	0.003373	1.32321	Down		2
TC1900011312.hg.1	ZNF611	zinc finger protein 611	-2.21666	4.7739	-6.86873	0.000174301	0.00340503	1.29452	Down		2
TC1900007051.hg.1	ZNF439	zinc finger protein 439	-1.53072	3.718	-6.6721	0.000210817	0.00374008	1.09738	Down		2
TC1100012052.hg.1	CCDC82	coiled-coil domain containing 82	-1.6294	5.93976	-6.64161	0.000217208	0.00380833	1.06638	Down		2
TC1900009592.hg.1	ZNF562	zinc finger protein 562	-1.60493	5.55064	-6.57786	0.000231282	0.00394422	1.00117	Down		2
TC0100012272.hg.1	CNST	consortin, connexin sorting protein	-1.64163	6.20946	-6.52554	0.000243592	0.00403799	0.947276	Down		2
TC0600013147.hg.1	ARHGAP18	Rho GTPase activating protein 18	-1.94197	6.40514	-6.35829	0.000288111	0.00441492	0.772599	Down		2
TC0400007023.hg.1	PACRGL	parkin coregulated like	-1.67352	5.24895	-6.35307	0.000289641	0.0044272	0.76708	Down		2
TC1100012029.hg.1	FAM76B	family with sequence similarity 76 member B	-1.53898	5.16887	-6.29257	0.000308027	0.00458261	0.702948	Down		2
TC0200008534.hg.1	ANKRD36	ankyrin repeat domain 36	-1.63513	4.00343	-6.29023	0.000308764	0.00459043	0.700456	Down		2
TC0400006703.hg.1	KIAA0232	KIAA0232	-1.88141	4.93097	-6.15104	0.00035632	0.00498986	0.551012	Down		2
TC0100013349.hg.1	RSRP1	arginine and serine rich protein 1	-1.96894	6.53693	-5.92073	0.000453947	0.00570663	0.297934	Down		2
TC1500007237.hg.1	SCG3	secretogranin III	-1.72293	4.5921	-5.5591	0.000672881	0.00724481	-0.114459	Down		2
TC1400009668.hg.1	PNMA1	PNMA family member 1	-1.73637	5.53646	-5.41217	0.000793403	0.0079709	-0.287402	Down		2
TC1300010032.hg.1	SOHLH2	spermatogenesis and oogenesis specific basic helix-loop-helix 2	-1.86848	5.1798	-5.40092	0.000803568	0.00802681	-0.300771	Down		2
TC0200015608.hg.1	LANCL1	LanC like 1	-1.65411	4.99679	-5.39714	0.000807018	0.00805015	-0.30527	Down		2
TC0300011834.hg.1	FILIP1L	filamin A interacting protein 1 like	-1.51454	5.43396	-5.36605	0.000836017	0.00821197	-0.342347	Down		2
TC0900011454.hg.1	ZBTB26	zinc finger and BTB domain containing 26	-2.56115	4.07481	-5.15649	0.00106421	0.00956113	-0.595962	Down		2
TC0800011105.hg.1	TRIQK	triple QxxK/R motif containing	-1.56055	3.6072	-4.96924	0.00132713	0.011018	-0.828146	Down		2
TC0800011395.hg.1	LRP12	LDL receptor related protein 12	-1.72453	4.02699	-4.94041	0.00137362	0.0112407	-0.864364	Down		2
TC1000008328.hg.1	SHLD2	shieldin complex subunit 2	-2.54578	4.87656	-12.6667	2.50036e-06	0.00174206	5.47132	Down		#NA
TC0500011163.hg.1	CERT1	ceramide transporter 1	-2.56236	5.63358	-11.6462	4.56586e-06	0.00174206	4.91464	Down		#NA
TC2000008995.hg.1	NORAD	non-coding RNA activated by DNA damage	-2.56822	5.90648	-11.4364	5.19834e-06	0.00174206	4.79273	Down		#NA
TC0100008803.hg.1	MIGA1	mitoguardin 1	-2.28035	3.63276	-11.3428	5.51173e-06	0.00174206	4.73751	Down		#NA
TC1000010407.hg.1	CCNYL2	cyclin Y like 2 (pseudogene)	-2.25027	4.94103	-11.1883	6.07726e-06	0.00174206	4.64506	Down		#NA
TC0100018006.hg.1	ADSS2	adenylosuccinate synthase 2	-2.18177	6.10205	-10.9544	7.06178e-06	0.00174206	4.50225	Down		#NA
TC1000009894.hg.1	MINDY3	MINDY lysine 48 deubiquitinase 3	-2.27957	4.05226	-10.6559	8.58912e-06	0.00174206	4.31477	Down		#NA
TC0100011026.hg.1	RO60	Ro60, Y RNA binding protein	-2.96487	5.68809	-10.577	9.05279e-06	0.00174206	4.26419	Down		#NA
TC0600007310.hg.1	HCG11	HLA complex group 11	-2.37211	4.71083	-10.2585	1.12343e-05	0.00174206	4.05549	Down		#NA
TC0100012421.hg.1	FAM41C	family with sequence similarity 41 member C	-2.1282	4.6508	-10.2351	1.14161e-05	0.00174206	4.03991	Down		#NA
TC4_GL000008v2_random00006444.hg.1	ANKRD20A12P	ankyrin repeat domain 20 family member A12, pseudogene	-2.10439	3.8296	-10.217	1.15596e-05	0.00174206	4.02778	Down		#NA
TC0500012372.hg.1	LARS1	leucyl-tRNA synthetase 1	-2.1732	7.62625	-10.0853	1.2665e-05	0.00174206	3.93895	Down		#NA
TC0600011996.hg.1	MMUT	methylmalonyl-CoA mutase	-1.99745	5.80072	-9.95946	1.38333e-05	0.00174206	3.85286	Down		#NA
TC0500010640.hg.1	TMEM267	transmembrane protein 267	-2.01945	4.59373	-9.7802	1.57128e-05	0.00174206	3.72813	Down		#NA
TC0900007142.hg.1	EBLN3P	endogenous Bornavirus like nucleoprotein 3, pseudogene	-2.21556	5.32812	-9.74688	1.60929e-05	0.00174206	3.70467	Down		#NA
TC1000010536.hg.1	GLUD1P2	glutamate dehydrogenase 1 pseudogene 2	-1.92186	6.4747	-9.5972	1.79331e-05	0.00174206	3.59819	Down		#NA
TC1900011318.hg.1	ZNF888	zinc finger protein 888	-1.90692	3.8986	-9.57728	1.81953e-05	0.00174206	3.58389	Down		#NA
TC1000012604.hg.1	EEF1AKMT2	EEF1A lysine methyltransferase 2	-2.51261	5.4613	-9.53817	1.87229e-05	0.00174206	3.55571	Down		#NA
TC0800011804.hg.1	CCDC26	CCDC26 long non-coding RNA	-2.19561	5.33661	-9.53601	1.87525e-05	0.00174206	3.55415	Down		#NA
TC0700006899.hg.1	SNORD93	small nucleolar RNA, C/D box 93	-2.00506	3.22937	-9.5108	1.91023e-05	0.00174206	3.53592	Down		#NA
TC0600009868.hg.1	ARMT1	acidic residue methyltransferase 1	-2.27114	5.6745	-9.4462	2.00326e-05	0.00174206	3.48896	Down		#NA
TC1000007878.hg.1	KIFBP	kinesin family binding protein	-1.87589	4.517	-9.44456	2.00568e-05	0.00174206	3.48776	Down		#NA
TC0100016678.hg.1	NIBAN1	niban apoptosis regulator 1	-2.06877	5.66464	-9.35209	2.14803e-05	0.00176109	3.41993	Down		#NA
TC0800011139.hg.1	VIRMA	vir like m6A methyltransferase associated	-2.13023	6.06905	-9.24984	2.31878e-05	0.00178678	3.34409	Down		#NA
TC1900009583.hg.1	ZNF266	zinc finger protein 266	-2.1825	4.54978	-9.03056	2.73894e-05	0.00187856	3.17843	Down		#NA
TC1100008786.hg.1	CEP295	centrosomal protein 295	-2.29142	4.02126	-9.02641	2.74767e-05	0.00187856	3.17525	Down		#NA
TC0600008346.hg.1	KIAA1586	KIAA1586	-1.89488	6.35645	-8.97365	2.8615e-05	0.00188708	3.13475	Down		#NA
TC1800008779.hg.1	NARS1	asparaginyl-tRNA synthetase 1	-2.04724	6.92247	-8.97093	2.86753e-05	0.00188708	3.13265	Down		#NA
TC1800007355.hg.1	C18orf54	chromosome 18 open reading frame 54	-1.80438	3.58808	-8.96448	2.88184e-05	0.00188708	3.12768	Down		#NA
TC1200008706.hg.1	WASHC4	WASH complex subunit 4	-2.38117	4.71383	-8.8486	3.15309e-05	0.00191489	3.03777	Down		#NA
TC1400009186.hg.1	ERO1A	endoplasmic reticulum oxidoreductase 1 alpha	-2.12037	8.04058	-8.8483	3.15384e-05	0.00191489	3.03753	Down		#NA
TC1900009588.hg.1	ZNF121	zinc finger protein 121	-1.93481	6.56888	-8.83887	3.17715e-05	0.00191634	3.03016	Down		#NA
TC0900008028.hg.1	MFSD14B	major facilitator superfamily domain containing 14B	-2.0275	7.03306	-8.76306	3.37174e-05	0.00193361	2.97061	Down		#NA
TC0700006945.hg.1	PALS2	protein associated with LIN7 2, MAGUK family member	-2.11553	5.69066	-8.71312	3.50722e-05	0.00193732	2.9311	Down		#NA
TC0200007035.hg.1	SELENOI	selenoprotein I	-1.90447	5.04188	-8.62405	3.76432e-05	0.00197512	2.86004	Down		#NA
TC1100011374.hg.1	KMT5B	lysine methyltransferase 5B	-2.96812	5.17194	-8.54792	4.00088e-05	0.00198916	2.79873	Down		#NA
TC0500007890.hg.1	TENT2	terminal nucleotidyltransferase 2	-1.73224	6.84554	-8.54228	4.01906e-05	0.00198916	2.79417	Down		#NA
TC1500008692.hg.1	HERC2P7	hect domain and RLD 2 pseudogene 7	-1.93829	4.9933	-8.52161	4.08647e-05	0.00199777	2.77742	Down		#NA
TC0200011400.hg.1	SEPTIN2	septin 2	-2.07095	6.26308	-8.48381	4.2131e-05	0.00200547	2.74667	Down		#NA
TC0200009789.hg.1	MARCHF7	membrane associated ring-CH-type finger 7	-2.74701	8.02195	-8.39401	4.53187e-05	0.00206107	2.67309	Down		#NA
TC0500013291.hg.1	ATPSCKMT	ATP synthase c subunit lysine N-methyltransferase	-1.80747	4.45191	-8.39175	4.54021e-05	0.00206107	2.67123	Down		#NA
TC1100012229.hg.1	POGLUT3	protein O-glucosyltransferase 3	-1.94723	5.56387	-8.36466	4.64184e-05	0.0020753	2.64887	Down		#NA
TC0900009404.hg.1	PUM3	pumilio RNA binding family member 3	-1.95761	5.70562	-8.35219	4.68947e-05	0.0020842	2.63856	Down		#NA
TC1200012309.hg.1	MIR6880	microRNA 6880	2.03161	7.65892	8.33458	4.75768e-05	0.00209393	2.62396	Up		#NA
TC0300013933.hg.1	THUMPD3-AS1	THUMPD3 antisense RNA 1	-1.71323	4.00513	-8.31892	4.81926e-05	0.00209634	2.61096	Down		#NA
TC1100013007.hg.1	ZFP91-CNTF	ZFP91-CNTF readthrough (NMD candidate)	-2.06115	6.28532	-8.30127	4.88974e-05	0.00209978	2.59628	Down		#NA
TC1800006435.hg.1	ROCK1P1	Rho associated coiled-coil containing protein kinase 1 pseudogene 1	-2.35824	3.94206	-8.27253	5.00701e-05	0.00211292	2.5723	Down		#NA
TC0400008380.hg.1	MCUB	mitochondrial calcium uniporter dominant negative subunit beta	-2.34073	5.47232	-8.27084	5.014e-05	0.00211292	2.57089	Down		#NA
TC1600010752.hg.1	AARS1	alanyl-tRNA synthetase 1	-1.84856	8.85217	-8.26255	5.04847e-05	0.00211548	2.56396	Down		#NA
TC1200010928.hg.1	SNORD59B	small nucleolar RNA, C/D box 59B	-1.77765	5.66952	-8.25603	5.07575e-05	0.00212282	2.5585	Down		#NA
TC0100009199.hg.1	MFSD14A	major facilitator superfamily domain containing 14A	-1.72377	7.00291	-8.18645	5.37751e-05	0.00214962	2.50001	Down		#NA
TC1400010612.hg.1	PCNX4	pecanex 4	-1.62973	4.45032	-8.17676	5.42107e-05	0.00215512	2.49183	Down		#NA
TC1400009982.hg.1	PPP4R3A	protein phosphatase 4 regulatory subunit 3A	-1.67222	4.26287	-8.11974	5.68577e-05	0.00219578	2.44347	Down		#NA
TC0300013755.hg.1	LOC220729	succinate dehydrogenase complex flavoprotein subunit A pseudogene	-1.59317	5.60703	-8.05827	5.98744e-05	0.00224471	2.39098	Down		#NA
TC0300012208.hg.1	HACD2	3-hydroxyacyl-CoA dehydratase 2	-1.59297	6.02691	-8.03442	6.10931e-05	0.00224881	2.37051	Down		#NA
TC0500007421.hg.1	MTREX	Mtr4 exosome RNA helicase	-1.68419	6.5903	-8.01	6.23697e-05	0.00226909	2.34948	Down		#NA
TC1500009034.hg.1	CSNK1A1P1	casein kinase 1 alpha 1 pseudogene 1	-1.72304	5.04249	-8.00046	6.2876e-05	0.00227246	2.34126	Down		#NA
TC0X00008514.hg.1	INTS6L	integrator complex subunit 6 like	-1.87273	3.81176	-7.98466	6.3726e-05	0.00227586	2.3276	Down		#NA
TC0700007267.hg.1	YAE1	YAE1 maturation factor of ABCE1	-1.60363	4.53703	-7.98254	6.38407e-05	0.00227586	2.32577	Down		#NA
TC2000009916.hg.1	TGIF2-RAB5IF	TGIF2-RAB5IF readthrough	-2.00853	6.9109	-7.98102	6.3923e-05	0.00227586	2.32446	Down		#NA
TC0200012648.hg.1	PPP4R3B	protein phosphatase 4 regulatory subunit 3B	-2.19498	5.05743	-7.97446	6.42812e-05	0.00227913	2.31878	Down		#NA
TC0200014758.hg.1	AHCTF1P1	AT-hook containing transcription factor 1 pseudogene 1	-1.60759	7.6021	-7.96527	6.47856e-05	0.00227915	2.31083	Down		#NA
TC0600010235.hg.1	AFDN	afadin, adherens junction formation factor	-1.71445	6.67461	-7.94971	6.56508e-05	0.00229287	2.29732	Down	oncogene, fusion	#NA
TC0700007811.hg.1	INTS4P2	integrator complex subunit 4 pseudogene 2	-2.01981	5.87059	-7.94579	6.58708e-05	0.00229317	2.29392	Down		#NA
TC2200006935.hg.1	GRK3	G protein-coupled receptor kinase 3	-2.032	3.66486	-7.91242	6.77768e-05	0.00232228	2.26487	Down		#NA
TC0700011692.hg.1	ELAPOR2	endosome-lysosome associated apoptosis and autophagy regulator family member 2	-2.03648	6.51747	-7.89701	6.8678e-05	0.00234451	2.25142	Down		#NA
TC2000009944.hg.1	RTF2	replication termination factor 2	-1.61549	7.48612	-7.89145	6.90059e-05	0.00234878	2.24656	Down		#NA
TC0700007795.hg.1	CCT6P3	chaperonin containing TCP1 subunit 6 pseudogene 3	-1.79235	4.93889	-7.86174	7.07912e-05	0.00237335	2.22053	Down		#NA
TC0300011842.hg.1	TOMM70	translocase of outer mitochondrial membrane 70	-2.10524	6.99238	-7.84285	7.19523e-05	0.00239539	2.20395	Down		#NA
TC1000008467.hg.1	MARCHF5	membrane associated ring-CH-type finger 5	-2.13882	7.03946	-7.83251	7.25973e-05	0.00240396	2.19484	Down		#NA
TC0900011984.hg.1	MIR4674	microRNA 4674	2.08087	9.57363	7.82019	7.33744e-05	0.00241197	2.18398	Up		#NA
TC1500007379.hg.1	MINDY2	MINDY lysine 48 deubiquitinase 2	-2.69781	4.00097	-7.7942	7.50434e-05	0.00243118	2.16103	Down		#NA
TC0400012854.hg.1	TMEM144	transmembrane protein 144	-1.60415	5.82759	-7.78854	7.54131e-05	0.00243408	2.15602	Down		#NA
TC0700007178.hg.1	SEPTIN7	septin 7	-1.62345	7.98364	-7.74216	7.85156e-05	0.00248008	2.11485	Down		#NA
TC0100011242.hg.1	TMEM183A	transmembrane protein 183A	-1.5666	8.30601	-7.69125	8.20876e-05	0.00252707	2.06939	Down		#NA
TC0900011146.hg.1	ELP1	elongator acetyltransferase complex subunit 1	-2.11794	4.92118	-7.68356	8.26424e-05	0.00252707	2.0625	Down		#NA
TC1700009431.hg.1	SNORD91B	small nucleolar RNA, C/D box 91B	-1.56212	5.1092	-7.68133	8.28042e-05	0.00252707	2.0605	Down		#NA
TC0100006469.hg.1	LINC01128	long intergenic non-protein coding RNA 1128	-1.60123	6.5717	-7.63965	8.58936e-05	0.00255049	2.02303	Down		#NA
TC0100014226.hg.1	CZIB	CXXC motif containing zinc binding protein	-1.83204	8.23518	-7.63395	8.63264e-05	0.00255107	2.01789	Down		#NA
TC0600009051.hg.1	AFG1L	AFG1 like ATPase	-1.57487	3.91726	-7.53265	9.44328e-05	0.00264632	1.92597	Down		#NA
TC0200010149.hg.1	SCHLAP1	SWI/SNF complex antagonist associated with prostate cancer 1	-1.71044	3.7126	-7.53203	9.44852e-05	0.00264632	1.9254	Down		#NA
TC0200011919.hg.1	LDAH	lipid droplet associated hydrolase	-2.17366	4.55666	-7.4914	9.79749e-05	0.00268948	1.88821	Down		#NA
TC1000012491.hg.1	ENTPD7	ectonucleoside triphosphate diphosphohydrolase 7	-1.98017	5.00818	-7.48588	9.84601e-05	0.00269383	1.88314	Down		#NA
TC1300008614.hg.1	SPART	spartin	-2.17778	5.8721	-7.48318	9.86984e-05	0.00269383	1.88066	Down		#NA
TC0500013284.hg.1	SDHAP3	succinate dehydrogenase complex flavoprotein subunit A pseudogene 3	-1.67813	6.54283	-7.47056	9.98208e-05	0.00270378	1.86906	Down		#NA
TC0100017365.hg.1	EPRS1	glutamyl-prolyl-tRNA synthetase 1	-2.03567	8.24795	-7.46676	0.000100161	0.00270978	1.86557	Down		#NA
TC1000006639.hg.1	FBH1	F-box DNA helicase 1	-1.77702	7.08376	-7.45302	0.000101405	0.00272581	1.8529	Down		#NA
TC1600007575.hg.1	TP53TG3D	TP53 target 3D	-1.67128	4.35958	-7.40865	0.000105538	0.00277496	1.81189	Down		#NA
TC1400007155.hg.1	RTRAF	RNA transcription, translation and transport factor	-1.67692	8.38396	-7.37805	0.000108497	0.00280267	1.78348	Down		#NA
TC1600011558.hg.1	SMG1P7	SMG1 pseudogene 7	-1.56498	6.19494	-7.36362	0.000109926	0.0028154	1.77004	Down		#NA
TC1600008144.hg.1	PHAF1	phagosome assembly factor 1	-1.73545	5.85366	-7.3409	0.000112217	0.00284055	1.74884	Down		#NA
TC0200013331.hg.1	ANAPC1P2	ANAPC1 pseudogene 2	-1.70118	6.49509	-7.33947	0.000112363	0.00284161	1.7475	Down		#NA
TC1000008044.hg.1	GLUD1P3	glutamate dehydrogenase 1 pseudogene 3	-1.58933	8.31326	-7.2873	0.000117836	0.00290324	1.69858	Down		#NA
TC0200016667.hg.1	GPR75-ASB3	GPR75-ASB3 readthrough	-1.54725	6.21355	-7.23869	0.000123206	0.00296326	1.65271	Down		#NA
TC0100007693.hg.1	S100PBP	S100P binding protein	-1.96822	5.8808	-7.18904	0.000128974	0.00301509	1.60558	Down		#NA
TC1900007447.hg.1	ZNF101	zinc finger protein 101	-2.15997	4.63393	-7.16349	0.000132059	0.00304458	1.58122	Down		#NA
TC0300013944.hg.1	FGD5-AS1	FGD5 antisense RNA 1	-1.92001	5.59551	-7.11655	0.000137945	0.00308191	1.53626	Down		#NA
TC0900010789.hg.1	IARS1	isoleucyl-tRNA synthetase 1	-1.90921	7.56752	-7.10644	0.00013925	0.00309531	1.52654	Down		#NA
TC0100015048.hg.1	MIR548N	microRNA 548n	-1.58643	8.03249	-7.06743	0.000144419	0.00314044	1.48893	Down		#NA
TC0700007129.hg.1	DPY19L1P2	DPY19L1 pseudogene 2	-1.74602	4.18759	-7.02905	0.000149713	0.00319692	1.45175	Down		#NA
TC0300012880.hg.1	C3orf33	chromosome 3 open reading frame 33	-1.53824	3.76845	-7.02177	0.000150742	0.00320448	1.44468	Down		#NA
TC0X00009007.hg.1	PUDP	pseudouridine 5'-phosphatase	-1.63391	4.76937	-7.01129	0.000152237	0.003222	1.43448	Down		#NA
TC0200007717.hg.1	AHSA2P	activator of HSP90 ATPase homolog 2, pseudogene	-1.929	5.17211	-7.00064	0.000153773	0.0032288	1.42411	Down		#NA
TC0700010682.hg.1	DPY19L1P1	DPY19L1 pseudogene 1	-1.50856	3.75061	-6.99342	0.000154825	0.00323759	1.41707	Down		#NA
TC0300011314.hg.1	CFAP20DC	CFAP20 domain containing	-1.52025	3.5564	-6.97065	0.000158192	0.00327215	1.39483	Down		#NA
TC0500006737.hg.1	MARCHF6	membrane associated ring-CH-type finger 6	-1.6487	9.03402	-6.96989	0.000158305	0.00327215	1.3941	Down		#NA
TC0800010524.hg.1	BPNT2	3'(2'), 5'-bisphosphate nucleotidase 2	-1.51495	6.06911	-6.96623	0.000158855	0.00327767	1.39051	Down		#NA
TC2200007078.hg.1	TUG1	taurine up-regulated 1	-2.04658	5.43418	-6.96489	0.000159056	0.0032787	1.3892	Down		#NA
TC1900011916.hg.1	ZNF626	zinc finger protein 626	-1.69656	5.43953	-6.94582	0.000161958	0.00331108	1.37051	Down		#NA
TC1900008692.hg.1	ZNF480	zinc finger protein 480	-1.77179	3.18647	-6.94232	0.000162496	0.00331342	1.36708	Down		#NA
TC0700011151.hg.1	FKBP9P1	FKBP prolyl isomerase 9 pseudogene 1	-1.58967	6.37199	-6.94047	0.000162782	0.00331584	1.36526	Down		#NA
TC1100011684.hg.1	THAP12	THAP domain containing 12	-1.6528	6.4337	-6.92616	0.00016501	0.00332719	1.3512	Down		#NA
TC1700007628.hg.1	NPEPPSP1	NPEPPS pseudogene 1	-1.69565	4.48806	-6.89262	0.000170367	0.00337556	1.31815	Down		#NA
TC0200010419.hg.1	SGO2	shugoshin 2	-1.86744	3.50764	-6.87283	0.000173619	0.00339813	1.29858	Down		#NA
TC1400007033.hg.1	TOGARAM1	TOG array regulator of axonemal microtubules 1	-1.52359	4.7121	-6.85203	0.000177112	0.0034288	1.27796	Down		#NA
TC0100015580.hg.1	NBPF20	NBPF member 20	-1.60304	3.99907	-6.85082	0.000177316	0.0034288	1.27677	Down		#NA
TC0300013884.hg.1	DIPK2A	divergent protein kinase domain 2A	-2.56306	4.45143	-6.84033	0.000179109	0.00344855	1.26635	Down		#NA
TC1100011559.hg.1	MIR139	microRNA 139	1.62857	7.42341	6.74555	0.000196263	0.00361024	1.17158	Up		#NA
TC0700013524.hg.1	MACC1	MET transcriptional regulator MACC1	-1.83295	5.18391	-6.73332	0.000198606	0.00362874	1.15928	Down	oncogene	#NA
TC0700013336.hg.1	PMS2CL	PMS2 C-terminal like pseudogene	-2.12484	3.83716	-6.70873	0.000203414	0.00365505	1.13447	Down		#NA
TC1500010672.hg.1	TARS3	threonyl-tRNA synthetase 3	-1.74657	3.3017	-6.65888	0.000213561	0.00377489	1.08395	Down		#NA
TC0400011882.hg.1	PABPC4L	poly(A) binding protein cytoplasmic 4 like	1.52642	6.10455	6.62971	0.000219761	0.00383314	1.05425	Up		#NA
TC0900011577.hg.1	SNORA65	small nucleolar RNA, H/ACA box 65	2.14083	5.83761	6.58665	0.000229282	0.003921	1.01019	Up		#NA
TC1600009608.hg.1	NOMO2	NODAL modulator 2	-1.56676	7.78783	-6.5773	0.000231409	0.00394422	1.0006	Down		#NA
TC1600007113.hg.1	VPS35L	VPS35 endosomal protein sorting factor like	-1.50618	6.28823	-6.5446	0.000239025	0.00400682	0.96695	Down		#NA
TC0100014203.hg.1	TUT4	terminal uridylyl transferase 4	-1.9967	4.16411	-6.48733	0.000253046	0.00412513	0.907683	Down		#NA
TC1100007563.hg.1	LOC646813	DExH-box helicase 9 pseudogene	-1.54683	4.10086	-6.46474	0.000258824	0.00417292	0.884195	Down		#NA
TC0100018185.hg.1	MICOS10	mitochondrial contact site and cristae organizing system subunit 10	-1.5303	8.47723	-6.44497	0.000264003	0.00421754	0.863582	Down		#NA
TC1000011299.hg.1	WAPL	WAPL cohesin release factor	-2.03907	5.49301	-6.42837	0.000268442	0.00424944	0.846227	Down		#NA
TC0200015019.hg.1	LNPK	lunapark, ER junction formation factor	-1.79825	6.52698	-6.42539	0.000269246	0.00425234	0.843115	Down		#NA
TC1600011509.hg.1	RRN3P3	RRN3 pseudogene 3	-1.83498	5.11259	-6.39535	0.000277517	0.00432277	0.811615	Down		#NA
TC1400008632.hg.1	SNORD9	small nucleolar RNA, C/D box 9	-2.09387	5.27098	-6.36932	0.000284912	0.00439274	0.784229	Down		#NA
TC1000009920.hg.1	VIM-AS1	VIM antisense RNA 1	-1.55067	4.43661	-6.34975	0.000290617	0.00443699	0.763577	Down		#NA
TC0700010501.hg.1	GSDME	gasdermin E	-1.80115	3.8697	-6.3463	0.000291637	0.00444482	0.759927	Down		#NA
TC1000009217.hg.1	ABRAXAS2	abraxas 2, BRISC complex subunit	-2.09655	5.56901	-6.34562	0.000291837	0.00444534	0.759214	Down		#NA
TC0600011194.hg.1	ZNF204P	zinc finger protein 204, pseudogene	-1.51873	4.79984	-6.33203	0.000295891	0.00447413	0.744839	Down		#NA
TC1600010181.hg.1	NETO2	neuropilin and tolloid like 2	-1.7142	6.65651	-6.20709	0.000336253	0.00482086	0.611509	Down		#NA
TC0400007512.hg.1	SNORA26	small nucleolar RNA, H/ACA box 26	-1.6952	4.88587	-6.16157	0.000352453	0.0049565	0.562403	Down		#NA
TC1000007555.hg.1	SHLD2P3	shieldin complex subunit 2 pseudogene 3	-1.93079	4.68757	-6.15677	0.000354209	0.00496831	0.557216	Down		#NA
TC0300011135.hg.1	DCAF1	DDB1 and CUL4 associated factor 1	-1.63163	4.47491	-6.12992	0.000364223	0.00505849	0.52811	Down		#NA
TC0900012154.hg.1	TMEFF1	transmembrane protein with EGF like and two follistatin like domains 1	-1.56846	3.89384	-6.12379	0.000366554	0.00507424	0.521448	Down		#NA
TC1200012719.hg.1	CFAP251	cilia and flagella associated protein 251	-1.77843	4.59796	-6.10873	0.00037235	0.00510402	0.505065	Down		#NA
TC1000012581.hg.1	ARHGAP19-SLIT1	ARHGAP19-SLIT1 readthrough (NMD candidate)	-1.84465	7.59994	-6.02838	0.000405041	0.00535271	0.417138	Down		#NA
TC2000007088.hg.1	ABALON	apoptotic BCL2L1-antisense long non-coding RNA	1.72339	6.03611	5.9938	0.000420082	0.0054593	0.379023	Up		#NA
TC0300012790.hg.1	TMEM183BP	transmembrane protein 183B, pseudogene	-1.50216	7.80308	-5.99306	0.000420413	0.0054593	0.378198	Down		#NA
TC1000012548.hg.1	PARGP1	poly(ADP-ribose) glycohydrolase pseudogene 1	-1.98881	4.70793	-5.983	0.000424905	0.00549315	0.367086	Down		#NA
TC0X00010640.hg.1	STEEP1	STING1 ER exit protein 1	-1.56339	6.50672	-5.96178	0.000434564	0.0055591	0.343579	Down		#NA
TC1900011883.hg.1	ZNF799	zinc finger protein 799	-1.71947	3.815	-5.95138	0.000439389	0.00559612	0.332031	Down		#NA
TC0200016561.hg.1	PHOSPHO2-KLHL23	PHOSPHO2-KLHL23 readthrough	-1.91423	4.42464	-5.91109	0.000458637	0.00574282	0.287178	Down		#NA
TC0400007913.hg.1	SEPTIN11	septin 11	-1.68521	7.8656	-5.87878	0.000474749	0.00588684	0.251046	Down		#NA
TC0500007610.hg.1	ERBIN	erbb2 interacting protein	-1.53808	7.18132	-5.86112	0.000483822	0.00595497	0.231233	Down		#NA
TC2200008174.hg.1	IGLL1	immunoglobulin lambda like polypeptide 1	1.51919	6.40145	5.85696	0.000485986	0.0059699	0.226561	Up		#NA
TC0400009038.hg.1	TMEM131L	transmembrane 131 like	-1.91431	5.2023	-5.82133	0.000504976	0.00612347	0.186429	Down		#NA
TC0700011982.hg.1	CASTOR3	CASTOR family member 3	-1.69131	5.64772	-5.75836	0.000540578	0.00636495	0.115072	Down		#NA
TC0X00011406.hg.1	EOLA2	endothelium and lymphocyte associated ASCH domain 2	-1.6429	5.69393	-5.75052	0.0005452	0.00640028	0.106152	Down		#NA
TC0700007807.hg.1	ZNF92	zinc finger protein 92	-1.99767	5.82606	-5.72783	0.000558832	0.00647971	0.0802758	Down		#NA
TC1100009824.hg.1	CARS1	cysteinyl-tRNA synthetase 1	-1.55373	6.19872	-5.67718	0.000590644	0.00670529	0.0222481	Down		#NA
TC1000007337.hg.1	ZNF37A	zinc finger protein 37A	-1.80526	5.25486	-5.67596	0.000591435	0.00671114	0.0208447	Down		#NA
TC0100010924.hg.1	ODR4	odr-4 GPCR localization factor homolog	-1.75894	6.54385	-5.6742	0.000592573	0.00671559	0.0188294	Down		#NA
TC0700010216.hg.1	ZNF12	zinc finger protein 12	-2.1546	4.82996	-5.56569	0.000667972	0.00722346	-0.106779	Down		#NA
TC1000011938.hg.1	SHTN1	shootin 1	-1.72648	7.02476	-5.51544	0.00070643	0.00746448	-0.165515	Down		#NA
TC1000008984.hg.1	FHIP2A	FHF complex subunit HOOK interacting protein 2A	-1.72033	4.71664	-5.33557	0.000865557	0.0083874	-0.378823	Down		#NA
TC0100016492.hg.1	COP1	COP1 E3 ubiquitin ligase	-1.89254	5.06877	-5.27933	0.000923147	0.00874061	-0.446502	Down		#NA
TC1600009685.hg.1	RRN3P1	RRN3 pseudogene 1	-1.82337	4.79216	-5.26776	0.000935507	0.00882683	-0.460479	Down		#NA
[truncated: 80 more rows]
